# Supplementary material for: Manual joint mobilisation techniques, supervised physical activity, psychological treatment, acupuncture and patient education for patients with tension-type headache. A systematic review and meta-analysis
Source: PubMed Central journal article supplement (PMC8379845; doi:10.1186/s10194-021-01298-4), 2021-08-21
Supplement: 10194_2021_1298_MOESM1_ESM.pdf [file 10194_2021_1298_MOESM1_ESM.pdf]

## **Additional tables and figures**

### **Manual joint mobilisation techniques, supervised physical activity, psychological treatment, acupuncture and patient education for patients with tension-type headache. A systematic review and meta-analysis**

Lotte Skytte Krøll<sup>1</sup>, Henriette Edemann Callesen<sup>2</sup>, Louise Ninett Carlsen<sup>1,3</sup>, Kirsten Birkefoss<sup>4</sup>, Dagmar Beier<sup>5</sup>, Henrik Wulff Christensen<sup>6</sup>, Mette Jensen<sup>7</sup>, Hanna Tómasdóttir<sup>8</sup>, Hanne Würtzen<sup>9</sup>, Christel Vesth Høst<sup>3</sup>, Jakob Møller Hansen<sup>1,3</sup>.

**Table 1** Primary and secondary outcomes for, manual joint mobilisation techniques, supervised physical activity, psychological treatment, acupuncture, and patient education.

| Interventions                                                    | Outcome                                                          | Time-point                           | Primary/secondary           |
|------------------------------------------------------------------|------------------------------------------------------------------|--------------------------------------|-----------------------------|
| • Manual joint mobilisation techniques                           | Headache frequency, days per month                               | At the end of treatment              | Primary                     |
|                                                                  | Quality of life                                                  | At the end of the treatment          | Primary                     |
| • Supervised physical activity                                   | Headache frequency, days per month                               | Follow-up after the end of treatment | Secondary                   |
|                                                                  | Quality of life                                                  | Follow-up after the end of treatment | Secondary                   |
| • Acupuncture                                                    | Headache intensity measured on Numeric rating scale or 100mm VAS | At the end of the treatment          | Secondary                   |
|                                                                  | Frequency of tension-type headache, days per month               | At the end of the treatment          | Secondary                   |
|                                                                  | Functioning                                                      | At the end of the treatment          | Secondary                   |
|                                                                  | Acute medication intake in days                                  | At the end of the treatment          | Secondary                   |
|                                                                  | Sick leave, days per month                                       | At the end of the treatment          | Secondary                   |
|                                                                  | Serious adverse events                                           | At the end of the treatment          | Secondary                   |
|                                                                  | • Psychological treatment                                        | Headache frequency, days per month   | At the end of the treatment |
| Quality of life                                                  |                                                                  | At the end of the treatment          | Primary                     |
| Functioning                                                      |                                                                  | At the end of the treatment          | Primary                     |
| Headache intensity measured on Numeric rating scale or 100mm VAS |                                                                  | At the end of the treatment          | Secondary                   |
| Compliance                                                       |                                                                  | At the end of the treatment          | Secondary                   |
| Frequency of tension-type headache, days per month               |                                                                  | At the end of the treatment          | Secondary                   |
| Functioning                                                      |                                                                  | Follow-up after the end of treatment | Secondary                   |
| Depression                                                       |                                                                  | At the end of the treatment          | Secondary                   |
| Anxiety                                                          |                                                                  | At the end of the treatment          | Secondary                   |
| Stress symptoms                                                  |                                                                  | At the end of the treatment          | Secondary                   |
| Serious adverse events                                           |                                                                  | At the end of the treatment          | Secondary                   |
| • Patient education                                              | Headache frequency, days per month                               | At the end of the treatment          | Primary                     |
|                                                                  | Quality of life                                                  | At the end of the treatment          | Primary                     |
|                                                                  | Degree of increased knowledge about illness and treatment        | At the end of the treatment          | Primary                     |
|                                                                  | Frequency of tension-type headache, days per month               | At the end of the treatment          | Secondary                   |
|                                                                  | Headache intensity measured on Numeric rating scale or 100mm VAS | At the end of the treatment          | Secondary                   |
|                                                                  | Self-rated health                                                | At the end of the treatment          | Secondary                   |
|                                                                  | General pain                                                     | At the end of the treatment          | Secondary                   |
|                                                                  | Burden of symptoms                                               | At the end of the treatment          | Secondary                   |
|                                                                  | Serious adverse events                                           | At the end of the treatment          | Secondary                   |

Evaluation of the guideline: National Institute for Health and Care Excellence. "Headaches in over 12s: diagnosis and management [CG150]." (2012).

| <i>Domain 1. Scope and Purpose</i> |             |             |
|------------------------------------|-------------|-------------|
|                                    | Appraiser 1 | Appraiser 2 |
| Item 1                             | 6           | 5           |
| Item 2                             | 5           | 6           |
| Item 3                             | 7           | 3           |

| <i>Domain 2. Stakeholder Involvement</i> |             |             |
|------------------------------------------|-------------|-------------|
|                                          | Appraiser 1 | Appraiser 2 |
| Item 4                                   | 4           | 4           |
| Item 5                                   | 5           | 6           |
| Item 6                                   | 5           | 4           |

| <i>Domain 3. Rigour of Development</i> |             |             |
|----------------------------------------|-------------|-------------|
|                                        | Appraiser 1 | Appraiser 2 |
| Item 7                                 | 3           | 6           |
| Item 8                                 | 7           | 6           |
| Item 9                                 | 6           | 6           |
| Item 10                                | 5           | 6           |
| Item 11                                | 7           | 6           |
| Item 12                                | 6           | 6           |
| Item 13                                | 2           | 1           |
| Item 14                                | 5           | 4           |

| <i>Domain 4. Clarity of Presentation</i> |             |             |
|------------------------------------------|-------------|-------------|
|                                          | Appraiser 1 | Appraiser 2 |
| Item 15                                  | 6           | 6           |
| Item 16                                  | 7           | 4           |
| Item 17                                  | 7           | 6           |

| <i>Domain 5. Applicability</i> |             |             |
|--------------------------------|-------------|-------------|
|                                | Appraiser 1 | Appraiser 2 |
| Item 18                        | 2           | 4           |
| Item 19                        | 1           | 3           |
| Item 20                        | 7           | 5           |
| Item 21                        | 7           | 2           |

| <i>Domain 6. Editorial Independence</i> |             |             |
|-----------------------------------------|-------------|-------------|
|                                         | Appraiser 1 | Appraiser 2 |
| Item 22                                 | 7           | 3           |
| Item 23                                 | 4           | 4           |

| <i>Overall Assessment</i> |             |             |
|---------------------------|-------------|-------------|
|                           | Appraiser 1 | Appraiser 2 |
| OA1                       | 5           | 5           |

**Fig. 1** AGREE evaluation

**Table 2** AMSTAR Evaluation

| Name                             | Was meta-analysis performed for the relevant outcomes? | 1. Was an 'a priori' design provided? | 2. Was there duplicate study selection and data extraction? | 3. Was a comprehensive literature search performed? | 4. Was the status of publication (i.e. grey literature) used as an inclusion criterion? | 5. Was a list of studies (included and excluded) provided? | 6. Were the characteristics of the included studies provided? | 7. Was the scientific quality of the included studies assessed and documented? | 8. Was the scientific quality of the included studies used appropriately in formulating conclusions? | 9. Were the methods used to combine the findings of studies appropriate? | 10. Was the likelihood of publication bias assessed? | 11. Was conflict of interest included? |
|----------------------------------|--------------------------------------------------------|---------------------------------------|-------------------------------------------------------------|-----------------------------------------------------|-----------------------------------------------------------------------------------------|------------------------------------------------------------|---------------------------------------------------------------|--------------------------------------------------------------------------------|------------------------------------------------------------------------------------------------------|--------------------------------------------------------------------------|------------------------------------------------------|----------------------------------------|
| Cerritelli et al. 2017           | No                                                     | No                                    | Yes                                                         | Yes                                                 | Yes                                                                                     | Can't answer                                               | Yes                                                           | Yes                                                                            | Yes                                                                                                  | Yes                                                                      | Yes                                                  | Yes                                    |
| Falsiroli Maistrello et al. 2019 | Yes                                                    | Yes                                   | Yes                                                         | Yes                                                 | No                                                                                      | No                                                         | Yes                                                           | Yes                                                                            | Yes                                                                                                  | Yes                                                                      | Yes                                                  | No                                     |
| Coelho et al. 2019               | Yes                                                    | Yes                                   | No                                                          | Yes                                                 | No                                                                                      | No                                                         | Yes                                                           | Yes                                                                            | Yes                                                                                                  | Yes                                                                      | Yes                                                  | Yes                                    |
| Falsiroli Maistrello et al. 2018 | Yes                                                    | Yes                                   | Yes                                                         | Yes                                                 | No                                                                                      | No                                                         | Yes                                                           | Yes                                                                            | Yes                                                                                                  | Yes                                                                      | Yes                                                  | No                                     |
| Anheyer et al. 2019              | Yes                                                    | No                                    | Yes                                                         | Yes                                                 | No                                                                                      | Yes                                                        | Yes                                                           | Yes                                                                            | Yes                                                                                                  | Yes                                                                      | Yes                                                  | Yes                                    |
| Gu et al. 2018                   | Yes                                                    | No                                    | No                                                          | Yes                                                 | No                                                                                      | No                                                         | Yes                                                           | Yes                                                                            | Yes                                                                                                  | Yes                                                                      | Yes                                                  | Yes                                    |
| Harris et al. 2015               | No                                                     | No                                    | Yes                                                         | Yes                                                 | No                                                                                      | Can't answer                                               | Yes                                                           | Yes                                                                            | Yes                                                                                                  | No                                                                       | No                                                   | Yes                                    |
| Lee et al. 2019                  | Yes                                                    | No                                    | No                                                          | Yes                                                 | No                                                                                      | No                                                         | Yes                                                           | Yes                                                                            | Yes                                                                                                  | Yes                                                                      | Yes                                                  | Yes                                    |
| Linde et al. 2016                | Yes                                                    | No                                    | Yes                                                         | Yes                                                 | Yes                                                                                     | No                                                         | Yes                                                           | Yes                                                                            | Yes                                                                                                  | Yes                                                                      | Yes                                                  | No                                     |
| France et al. 2014               | No                                                     | No                                    | Yes                                                         | Yes                                                 | No                                                                                      | No                                                         | Yes                                                           | Yes                                                                            | No                                                                                                   | No                                                                       | No                                                   | Yes                                    |

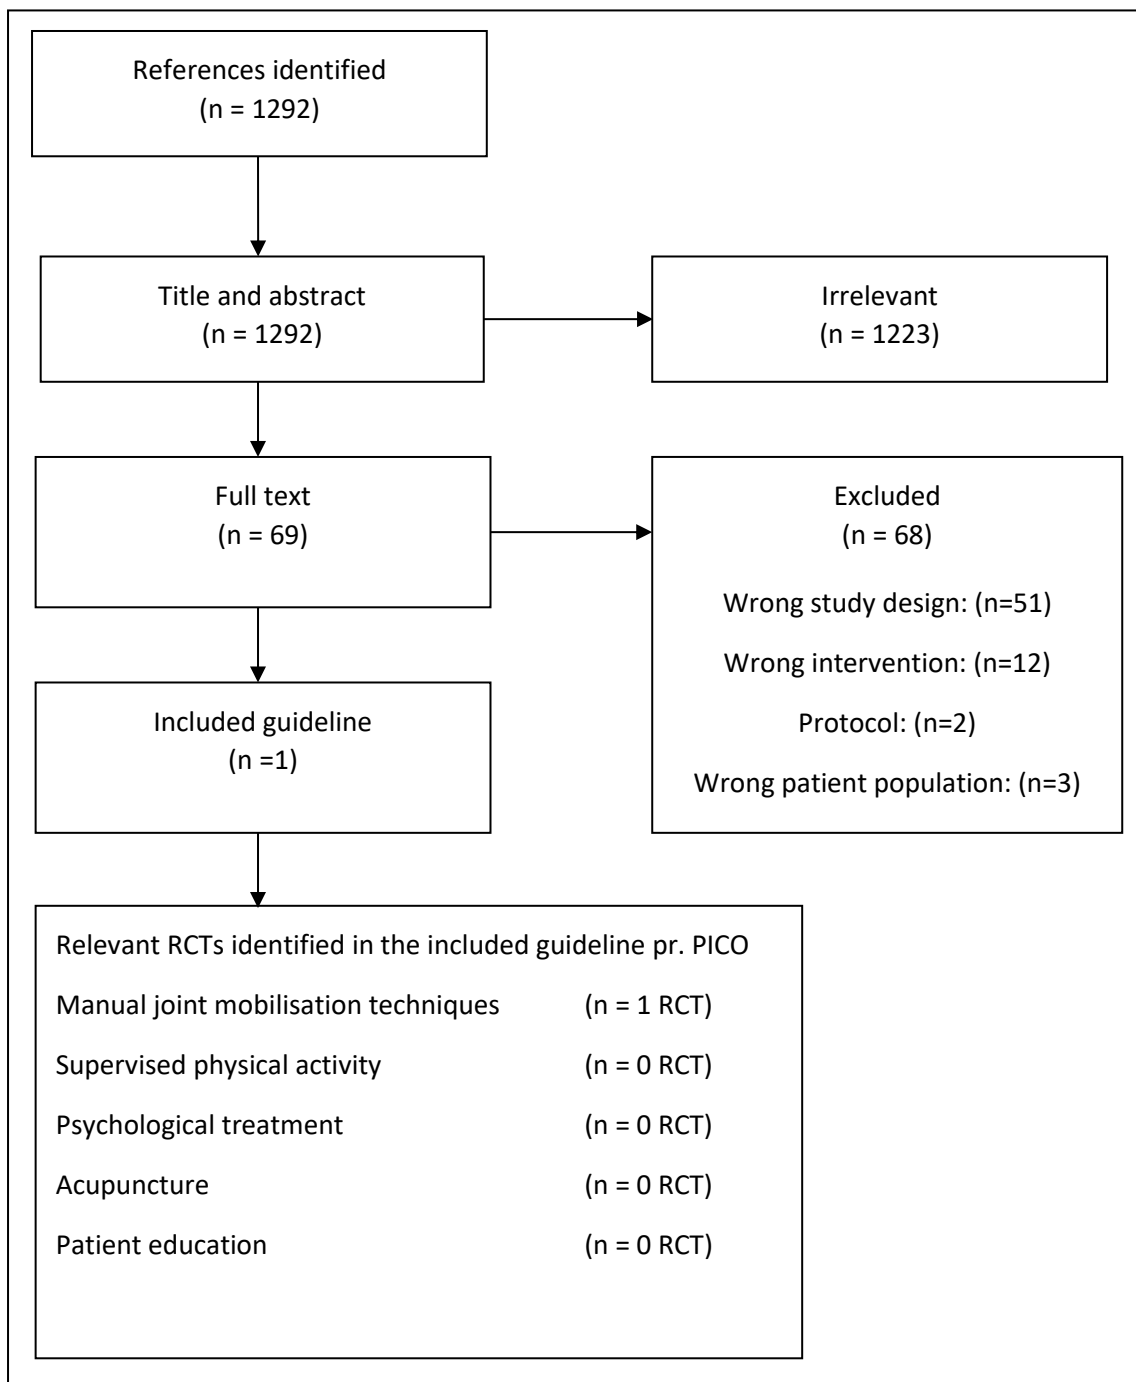

**Fig. 2** Flowchart, search for guidelines.

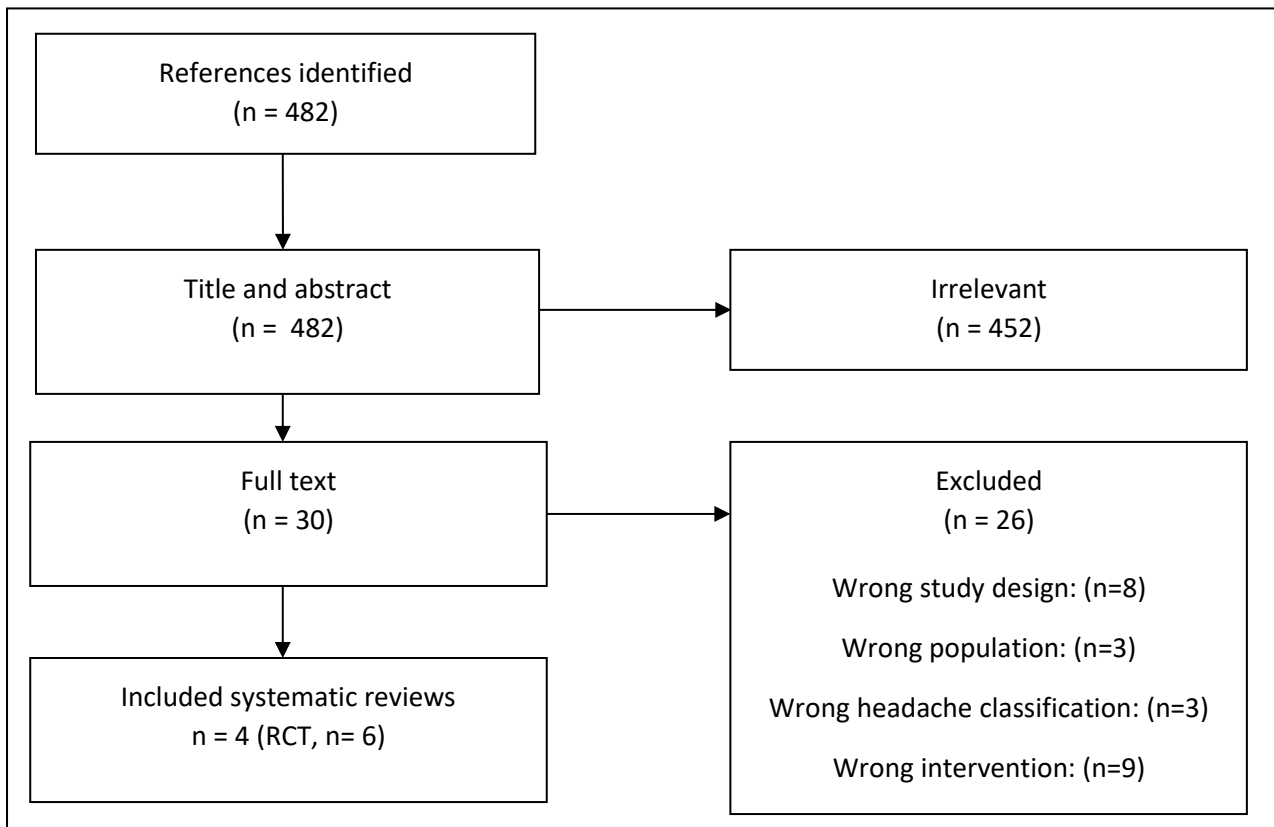

**Fig. 3** Flowchart, search for systematic reviews, manual joint mobilisation techniques.

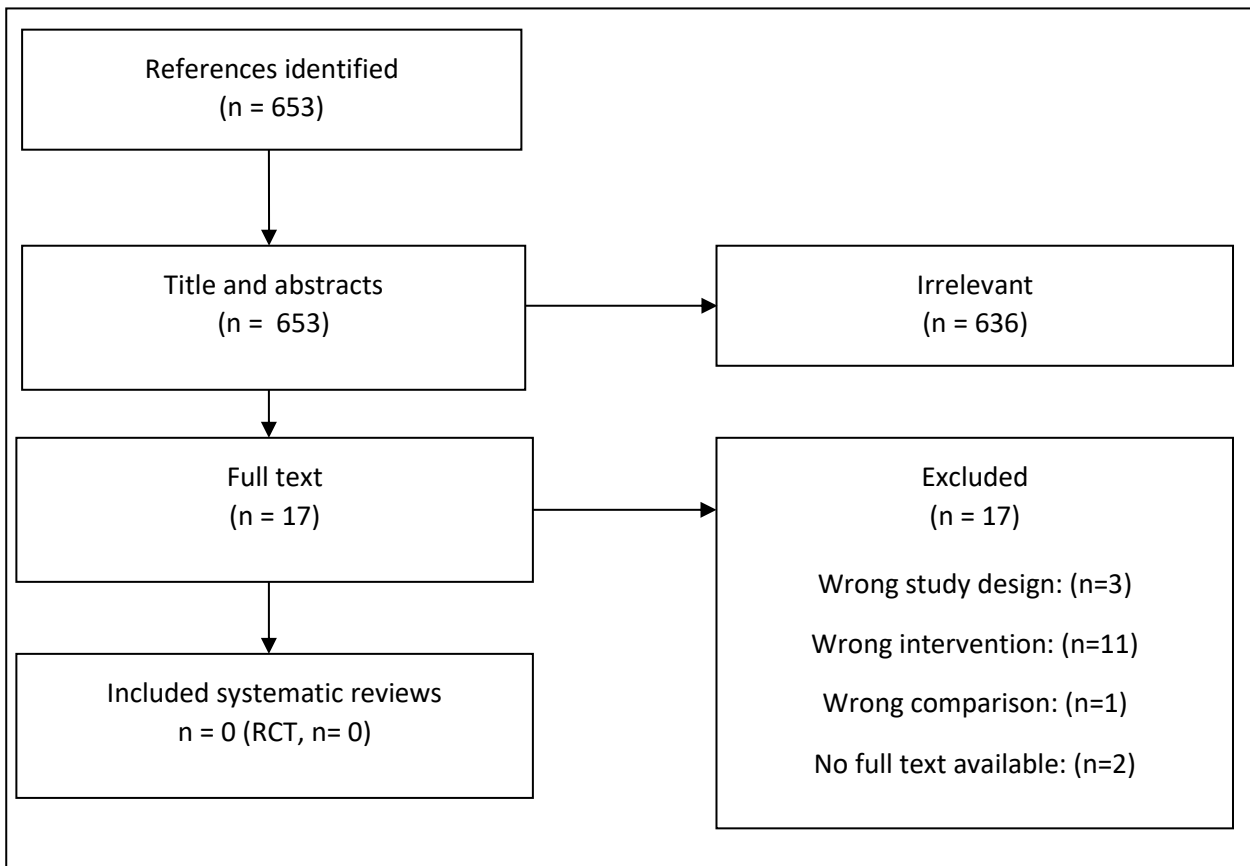

**Fig. 4** Flowchart, search for systematic reviews, supervised physical activity.

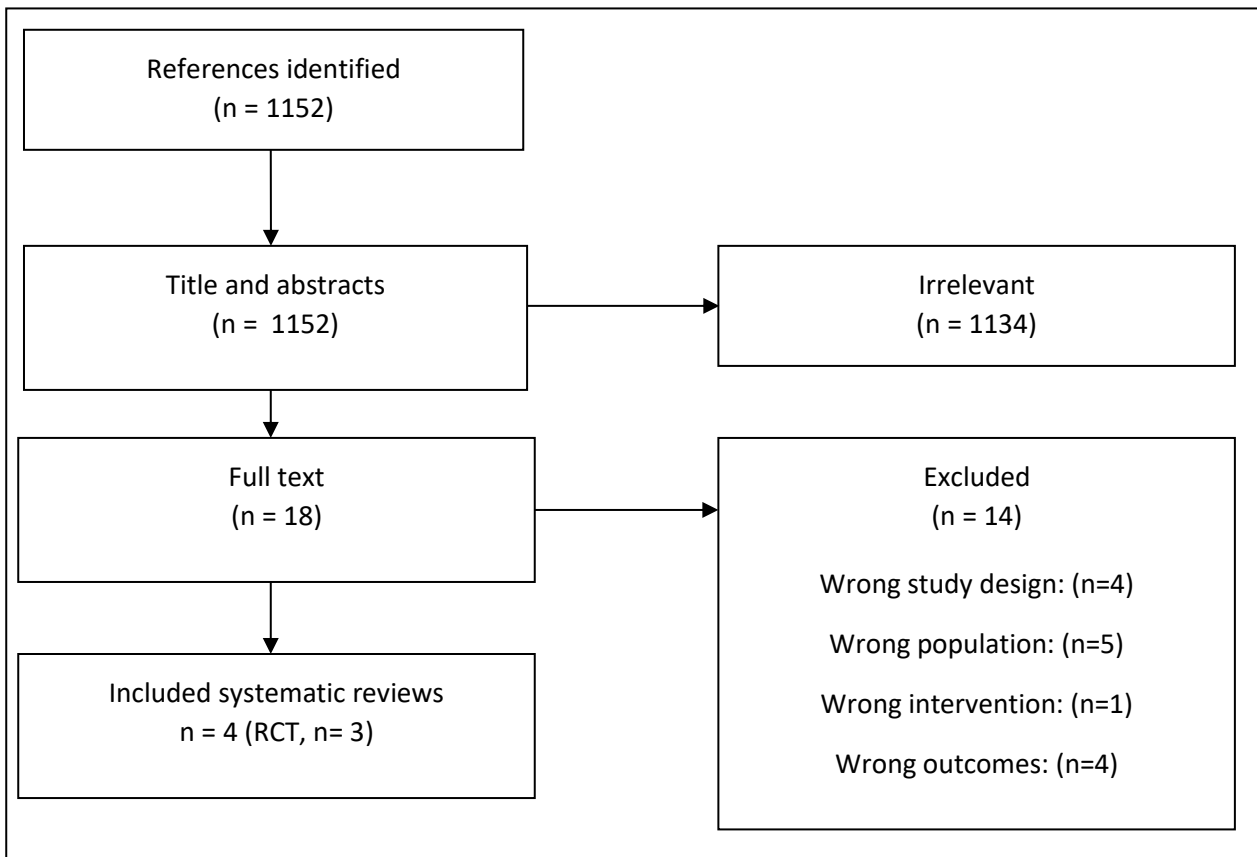

**Fig. 5** Flowchart, search for systematic reviews, psychological treatment.



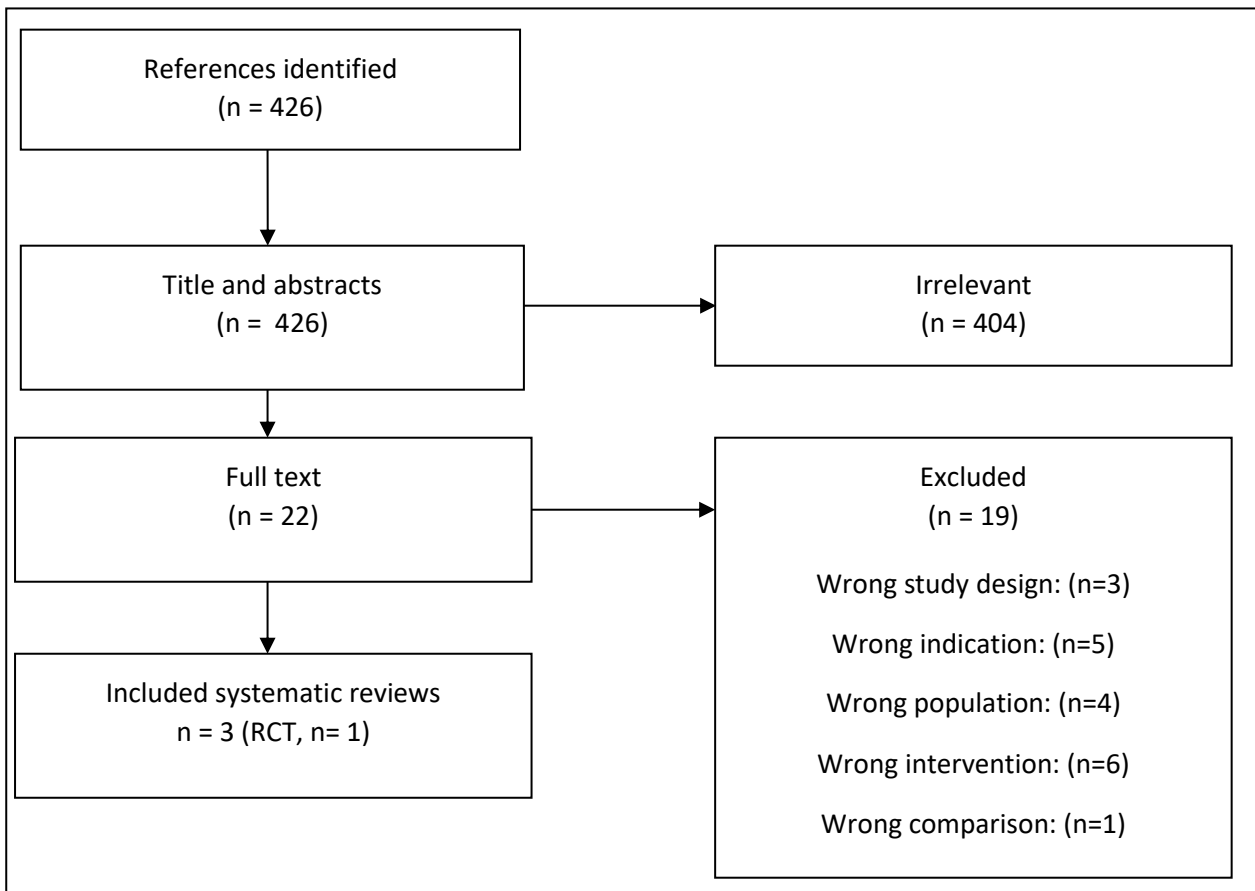

**Fig. 6** Flowchart, search for systematic reviews, acupuncture.

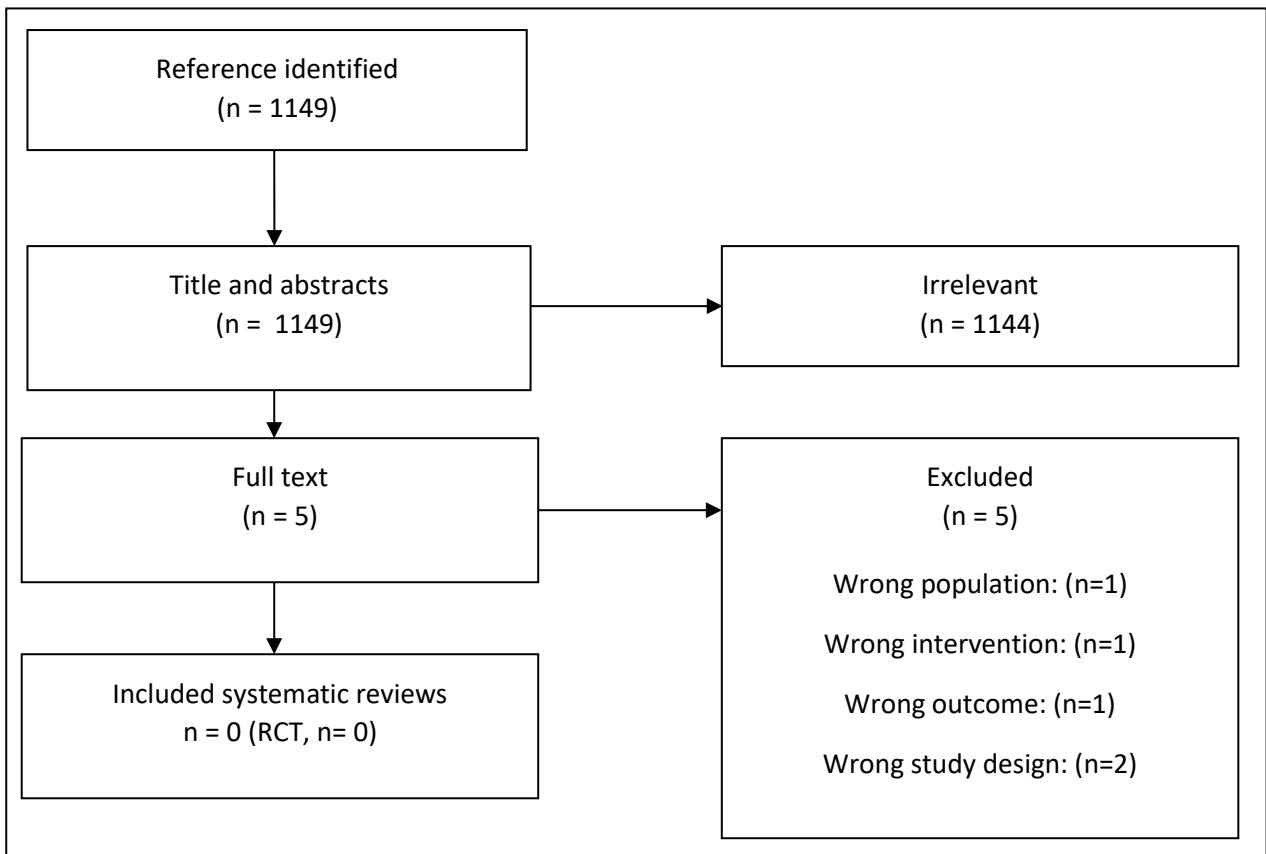

**Fig. 7** Flowchart, search for systematic reviews, patient education.

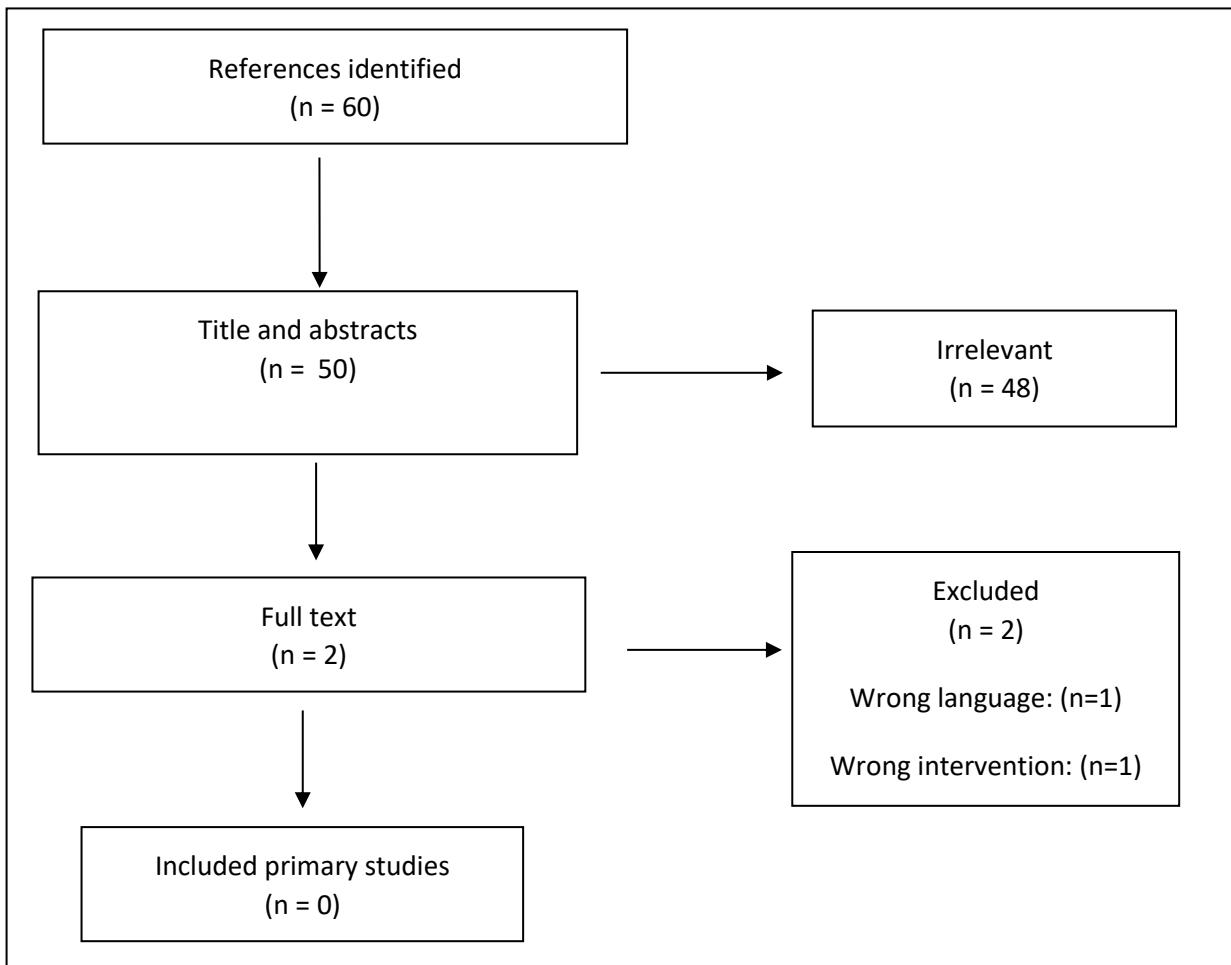

**Fig. 8** Flowchart, search for primary studies, manual joint mobilisation techniques.

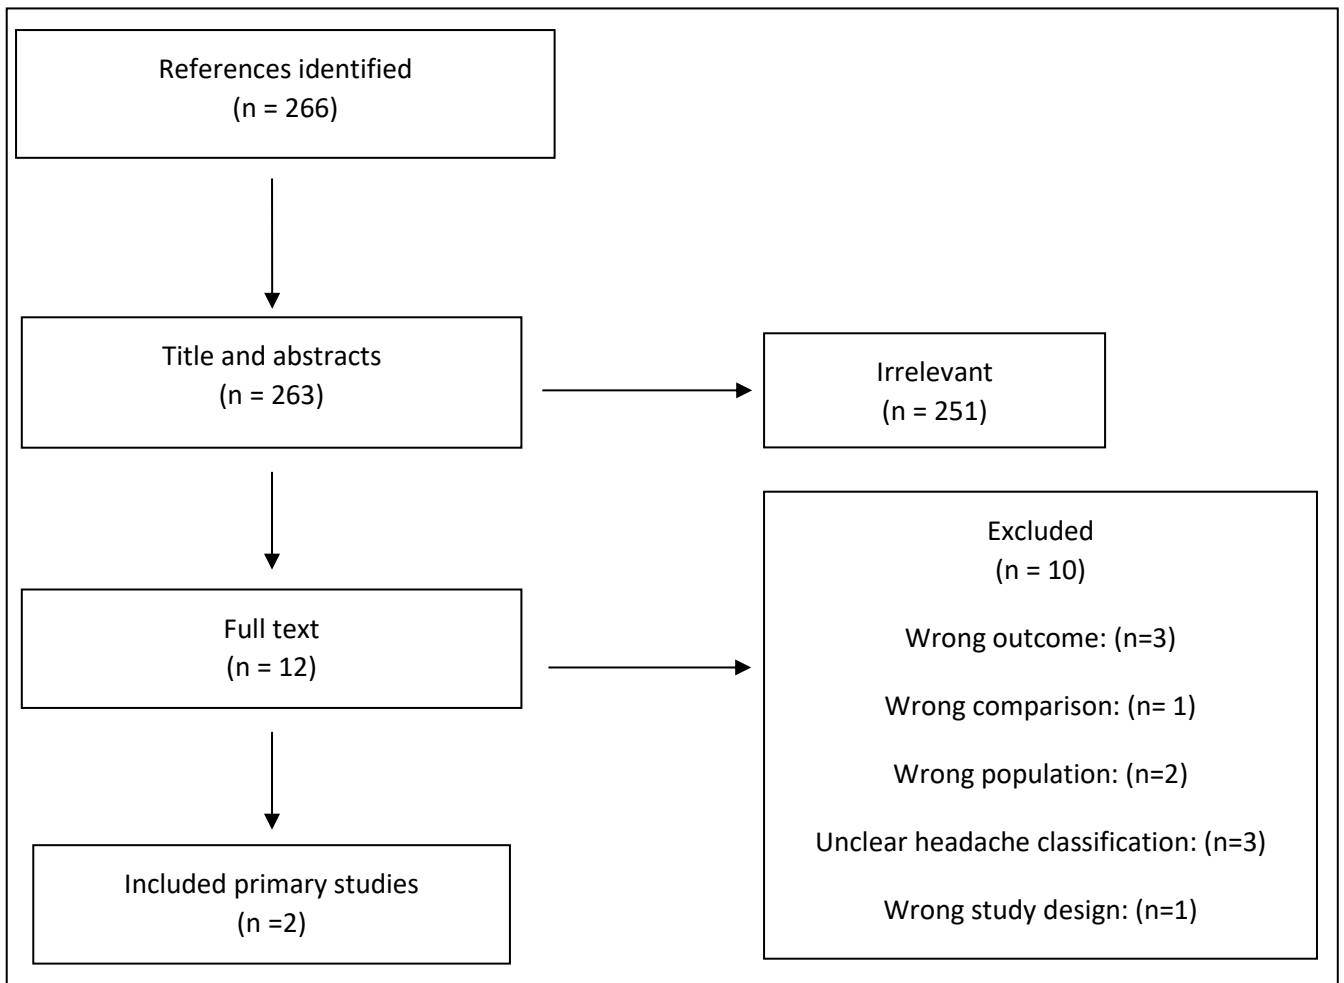

**Fig. 9** Flowchart, search for primary studies, supervised physical activity.

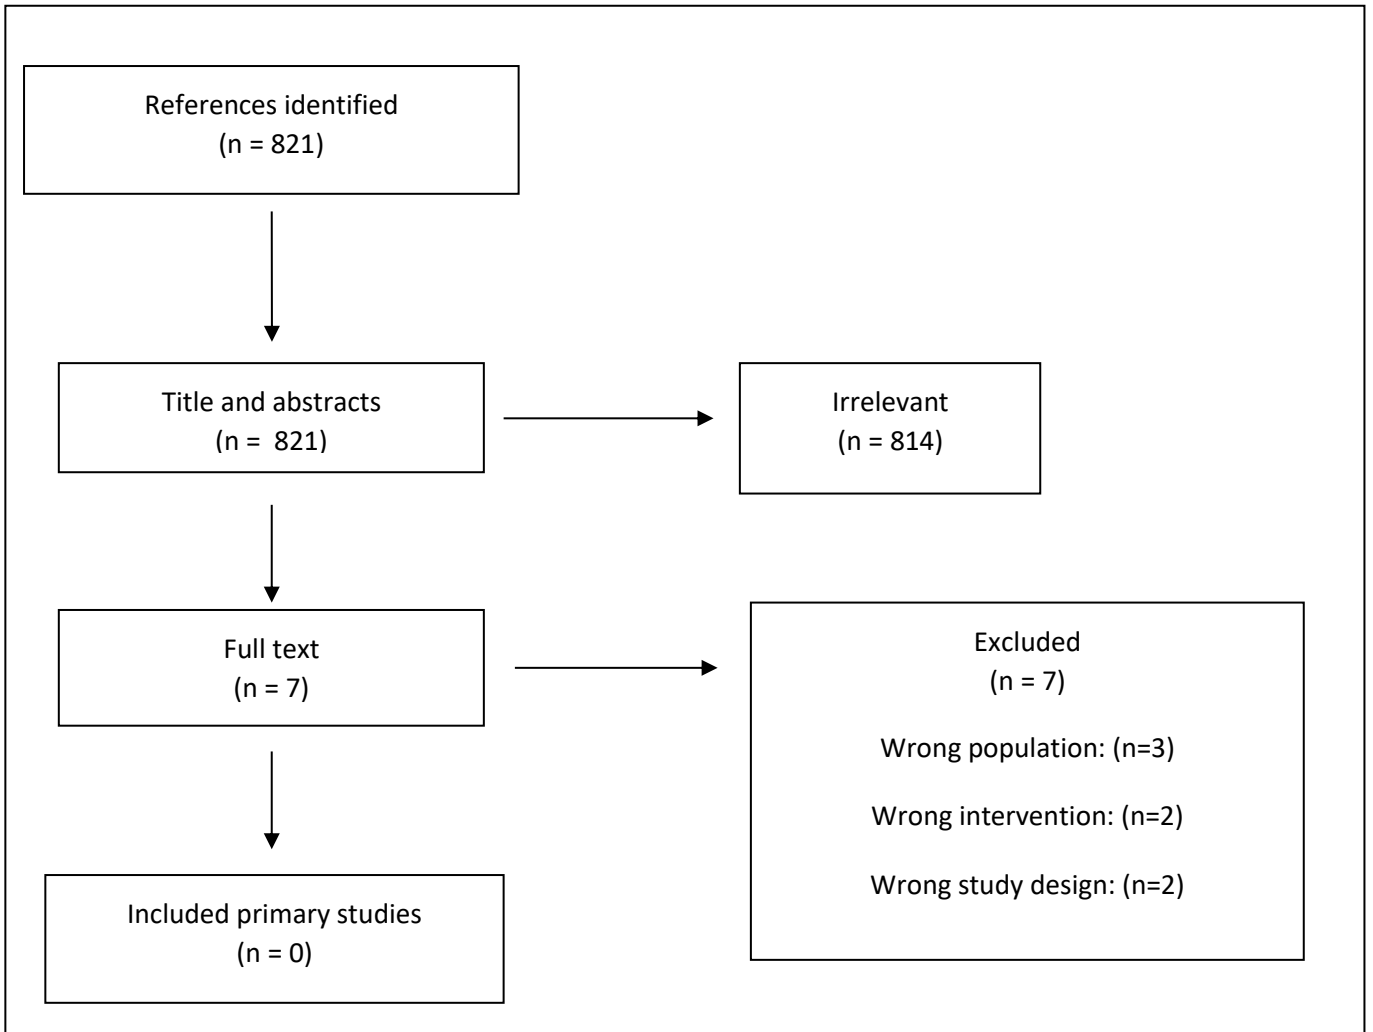

**Fig. 10** Flowchart, search for primary studies, psychological treatment.

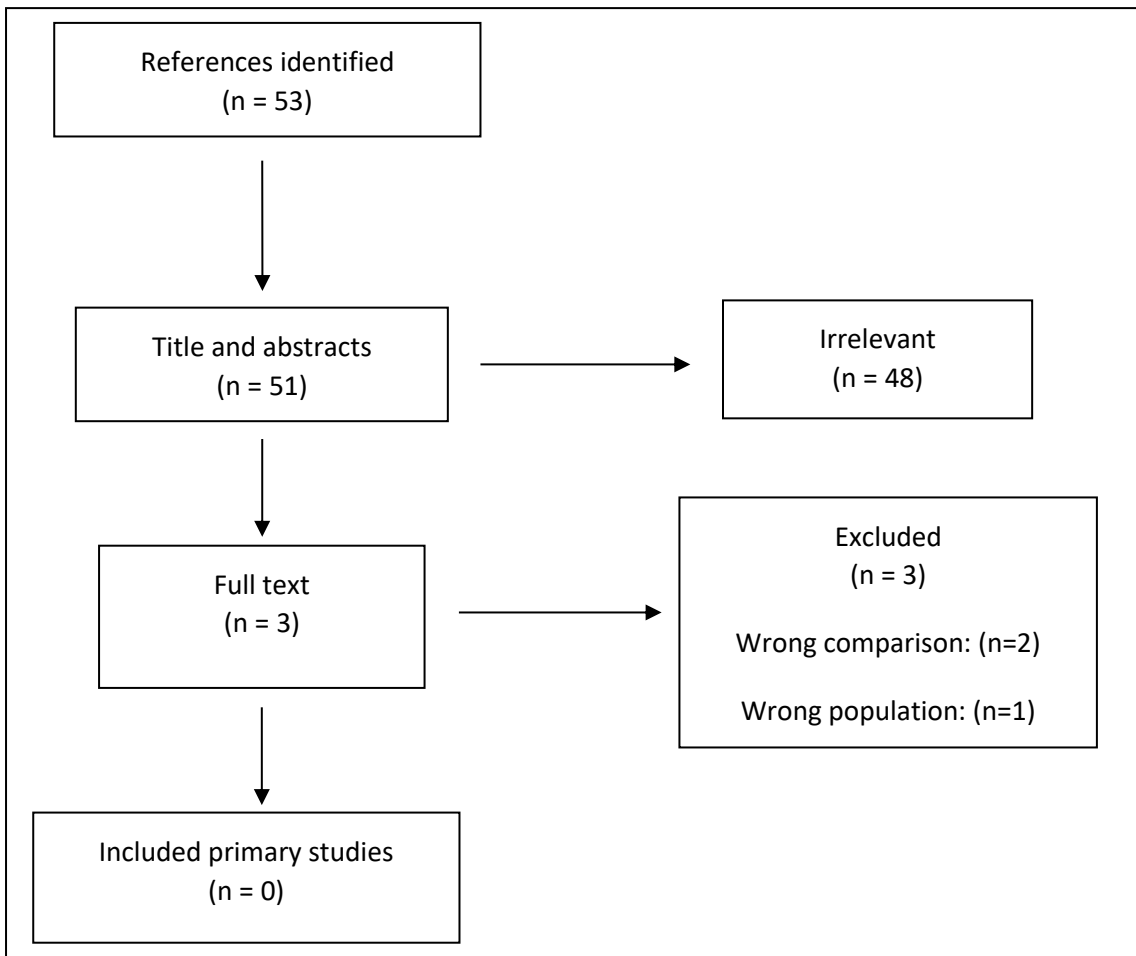

**Fig. 11** Flowchart, search for primary studies, acupuncture.

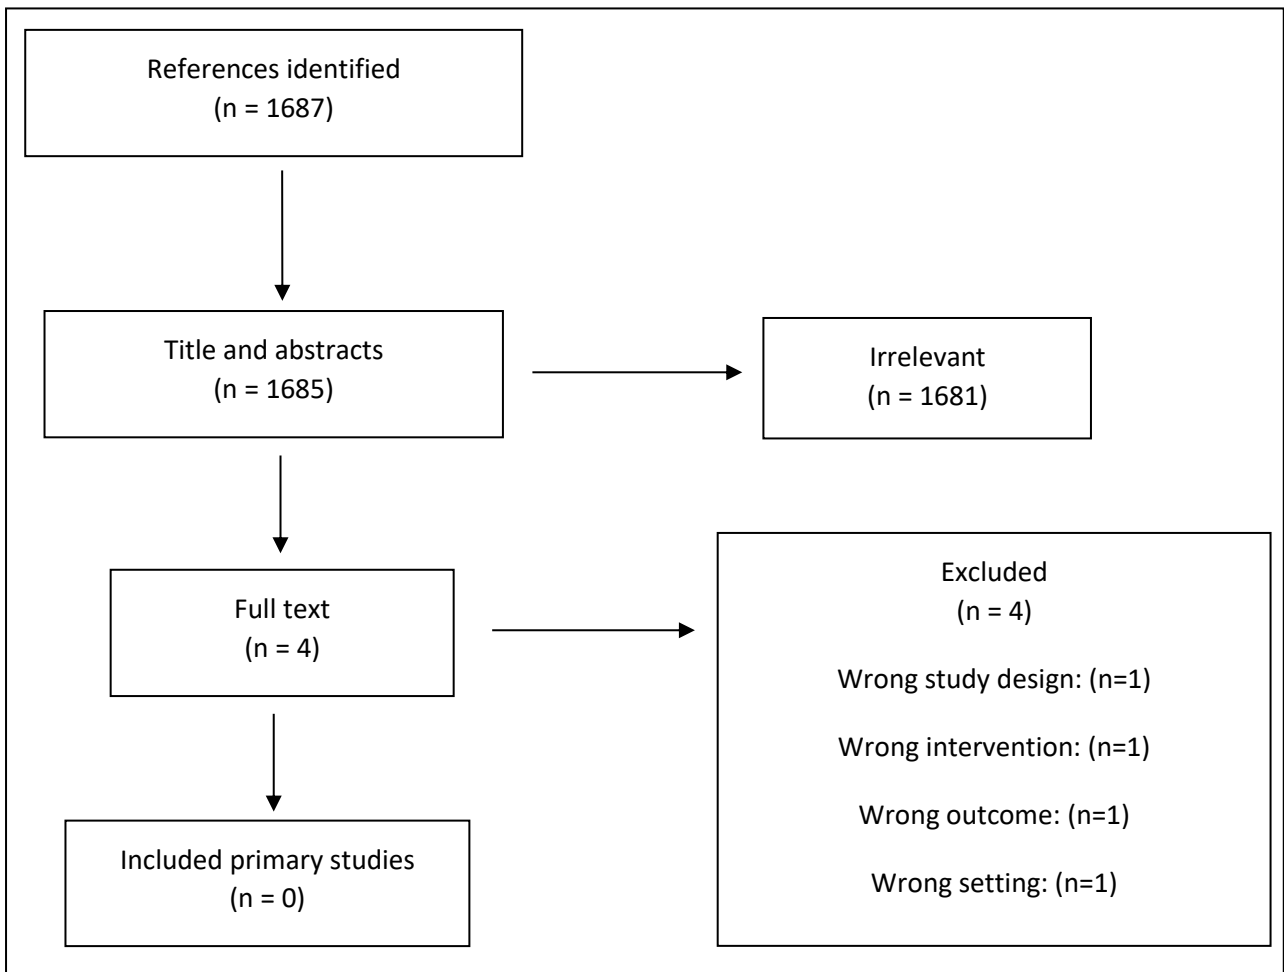

**Fig. 12** Flowchart, search for primary studies, patient education.

### Headache frequency, follow-up

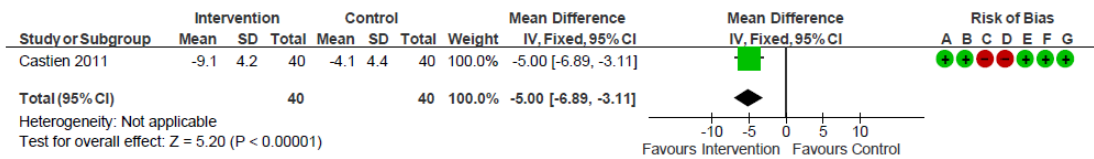

#### Risk of bias legend

- (A) Random sequence generation (selection bias)
- (B) Allocation concealment (selection bias)
- (C) Blinding of participants and personnel (performance bias)
- (D) Blinding of outcome assessment (detection bias)
- (E) Incomplete outcome data (attrition bias)
- (F) Selective reporting (reporting bias)
- (G) Other bias

### Quality of life, follow-up

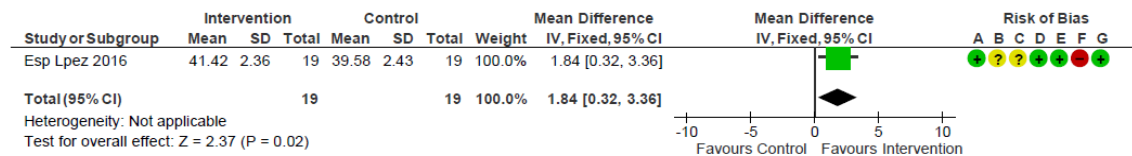

#### Risk of bias legend

- (A) Random sequence generation (selection bias)
- (B) Allocation concealment (selection bias)
- (C) Blinding of participants and personnel (performance bias)
- (D) Blinding of outcome assessment (detection bias)
- (E) Incomplete outcome data (attrition bias)
- (F) Selective reporting (reporting bias)
- (G) Other bias

### Headache intensity, end of treatment

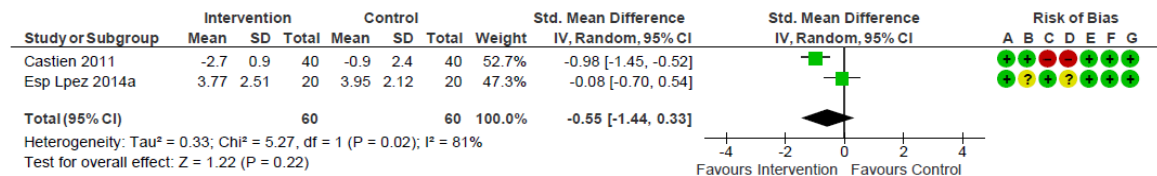

#### Risk of bias legend

- (A) Random sequence generation (selection bias)
- (B) Allocation concealment (selection bias)
- (C) Blinding of participants and personnel (performance bias)
- (D) Blinding of outcome assessment (detection bias)
- (E) Incomplete outcome data (attrition bias)
- (F) Selective reporting (reporting bias)
- (G) Other bias



Functioning, end of treatment

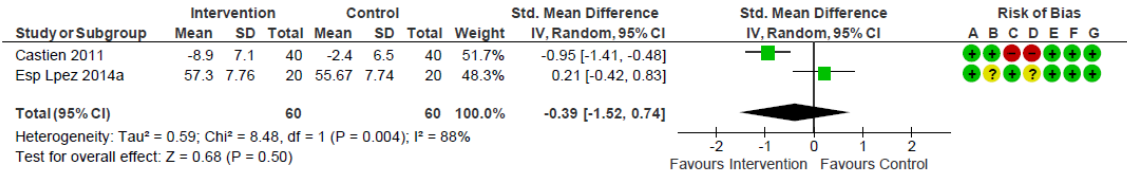

Risk of bias legend

- (A) Random sequence generation (selection bias)
- (B) Allocation concealment (selection bias)
- (C) Blinding of participants and personnel (performance bias)
- (D) Blinding of outcome assessment (detection bias)
- (E) Incomplete outcome data (attrition bias)
- (F) Selective reporting (reporting bias)
- (G) Other bias

Serious adverse events, end of treatment

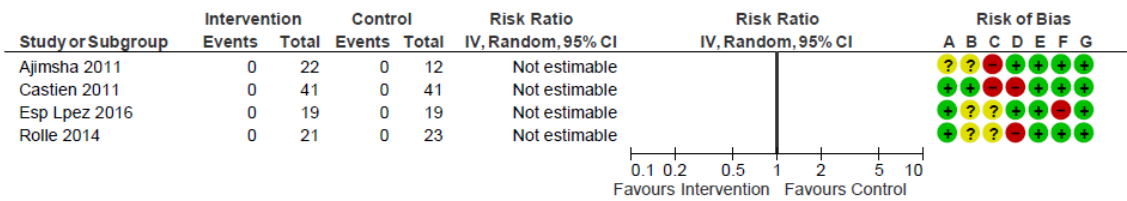

Risk of bias legend

- (A) Random sequence generation (selection bias)
- (B) Allocation concealment (selection bias)
- (C) Blinding of participants and personnel (performance bias)
- (D) Blinding of outcome assessment (detection bias)
- (E) Incomplete outcome data (attrition bias)
- (F) Selective reporting (reporting bias)
- (G) Other bias

Fig. 13 Meta-analyses of manual joint mobilisation techniques, secondary outcomes.

### Headache frequency, follow-up

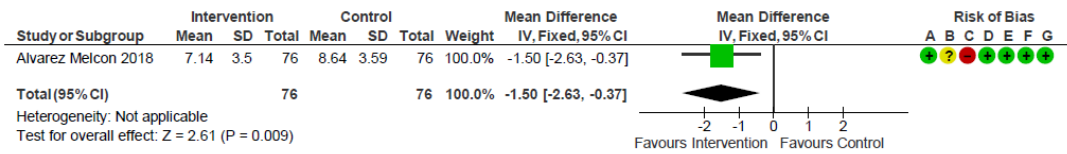

#### Risk of bias legend

- (A) Random sequence generation (selection bias)
- (B) Allocation concealment (selection bias)
- (C) Blinding of participants and personnel (performance bias)
- (D) Blinding of outcome assessment (detection bias)
- (E) Incomplete outcome data (attrition bias)
- (F) Selective reporting (reporting bias)
- (G) Other bias

### Headache intensity, end of treatment

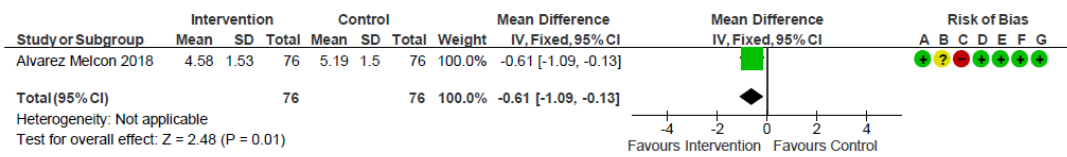

#### Risk of bias legend

- (A) Random sequence generation (selection bias)
- (B) Allocation concealment (selection bias)
- (C) Blinding of participants and personnel (performance bias)
- (D) Blinding of outcome assessment (detection bias)
- (E) Incomplete outcome data (attrition bias)
- (F) Selective reporting (reporting bias)
- (G) Other bias

### Acute medication intake in days, end of treatment

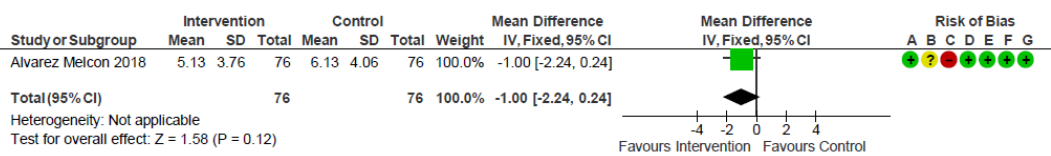

#### Risk of bias legend

- (A) Random sequence generation (selection bias)
- (B) Allocation concealment (selection bias)
- (C) Blinding of participants and personnel (performance bias)
- (D) Blinding of outcome assessment (detection bias)
- (E) Incomplete outcome data (attrition bias)
- (F) Selective reporting (reporting bias)
- (G) Other bias

**Fig. 14** Meta-analyses of supervised physical activity, secondary outcomes.

Stress symptoms, end of treatment

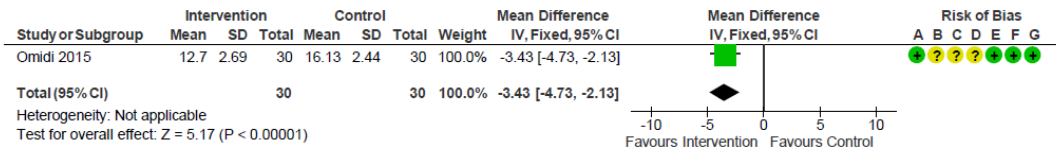

Risk of bias legend

- (A) Random sequence generation (selection bias)
- (B) Allocation concealment (selection bias)
- (C) Blinding of participants and personnel (performance bias)
- (D) Blinding of outcome assessment (detection bias)
- (E) Incomplete outcome data (attrition bias)
- (F) Selective reporting (reporting bias)
- (G) Other bias

**Fig. 15** Meta-analyses of psychological treatment, secondary outcomes.

Serious adverse events, end of treatment

| Study or Subgroup     | Intervention |             | Control |             | Weight | Risk Ratio           | Risk Ratio         | Risk of Bias |   |   |   |   |   |   |
|-----------------------|--------------|-------------|---------|-------------|--------|----------------------|--------------------|--------------|---|---|---|---|---|---|
|                       | Events       | Total       | Events  | Total       |        | IV, Random, 95% CI   | IV, Random, 95% CI | A            | B | C | D | E | F | G |
| Jena 2008             | 0            | 1613        | 0       | 1569        |        | Not estimable        |                    | +            | ? | ? | ? | ? | + | + |
| <b>Total (95% CI)</b> |              | <b>1613</b> |         | <b>1569</b> |        | <b>Not estimable</b> |                    |              |   |   |   |   |   |   |
| Total events          | 0            |             | 0       |             |        |                      |                    |              |   |   |   |   |   |   |

Heterogeneity: Not applicable  
 Test for overall effect: Not applicable

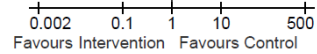

Risk of bias legend

- (A) Random sequence generation (selection bias)
- (B) Allocation concealment (selection bias)
- (C) Blinding of participants and personnel (performance bias)
- (D) Blinding of outcome assessment (detection bias)
- (E) Incomplete outcome data (attrition bias)
- (F) Selective reporting (reporting bias)
- (G) Other bias

**Fig. 16** Meta-analyses of acupuncture, secondary outcomes.

### Chiropractor

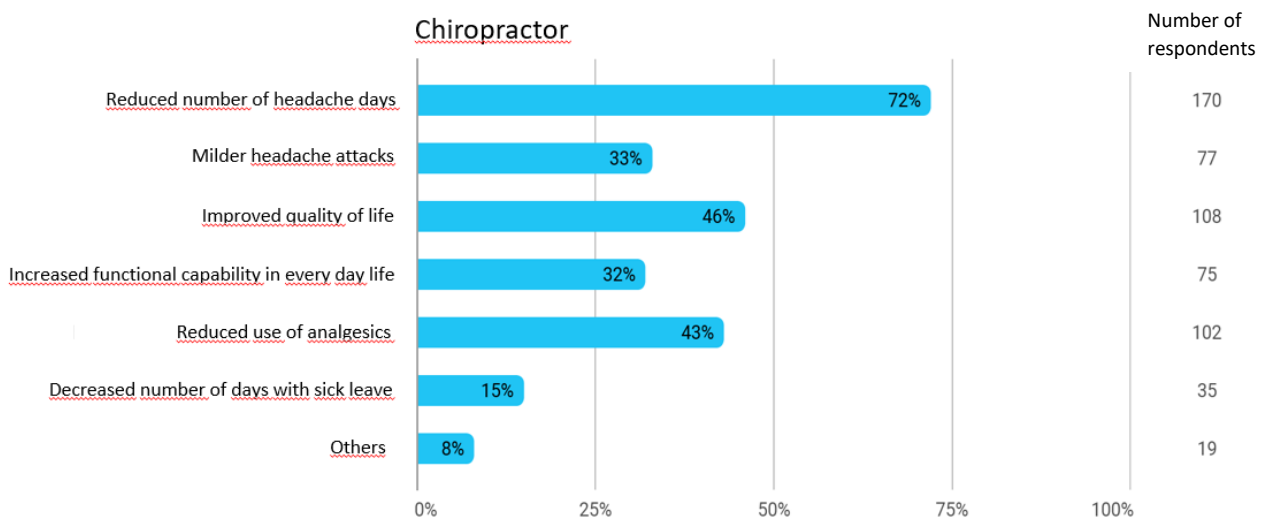

### Physiotherapist

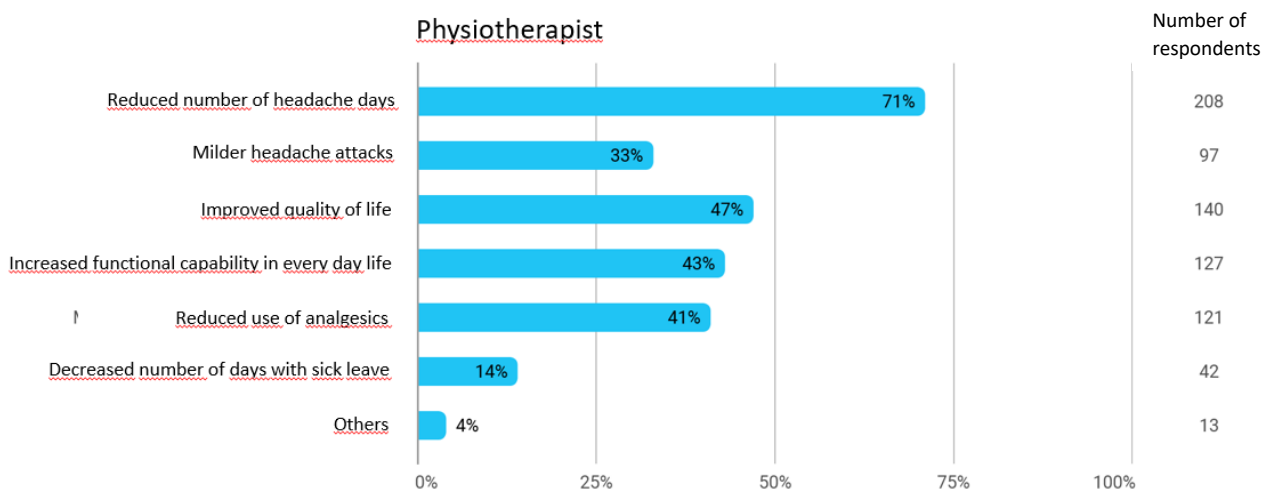

### Psychologist

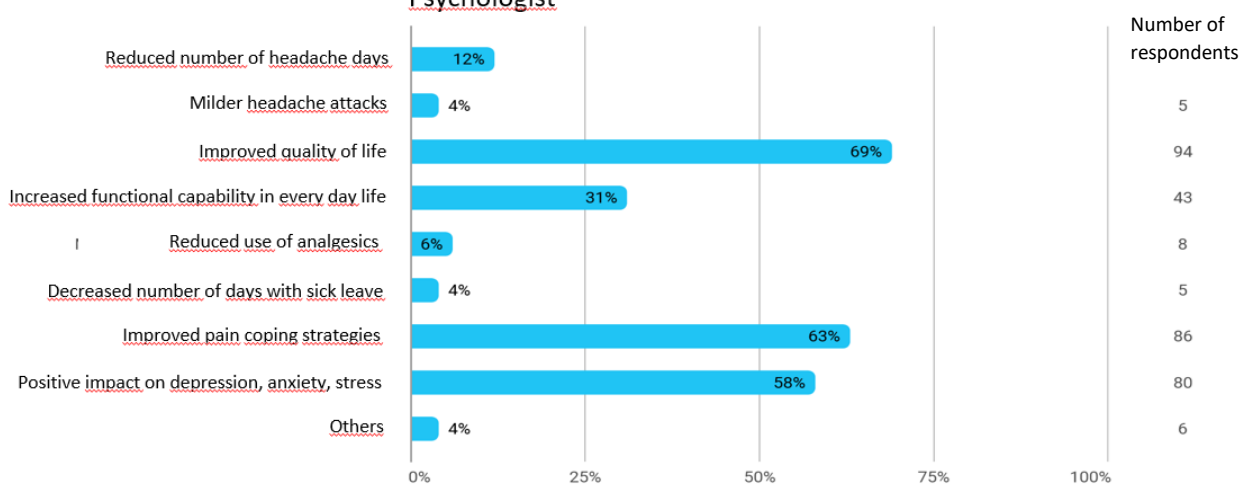

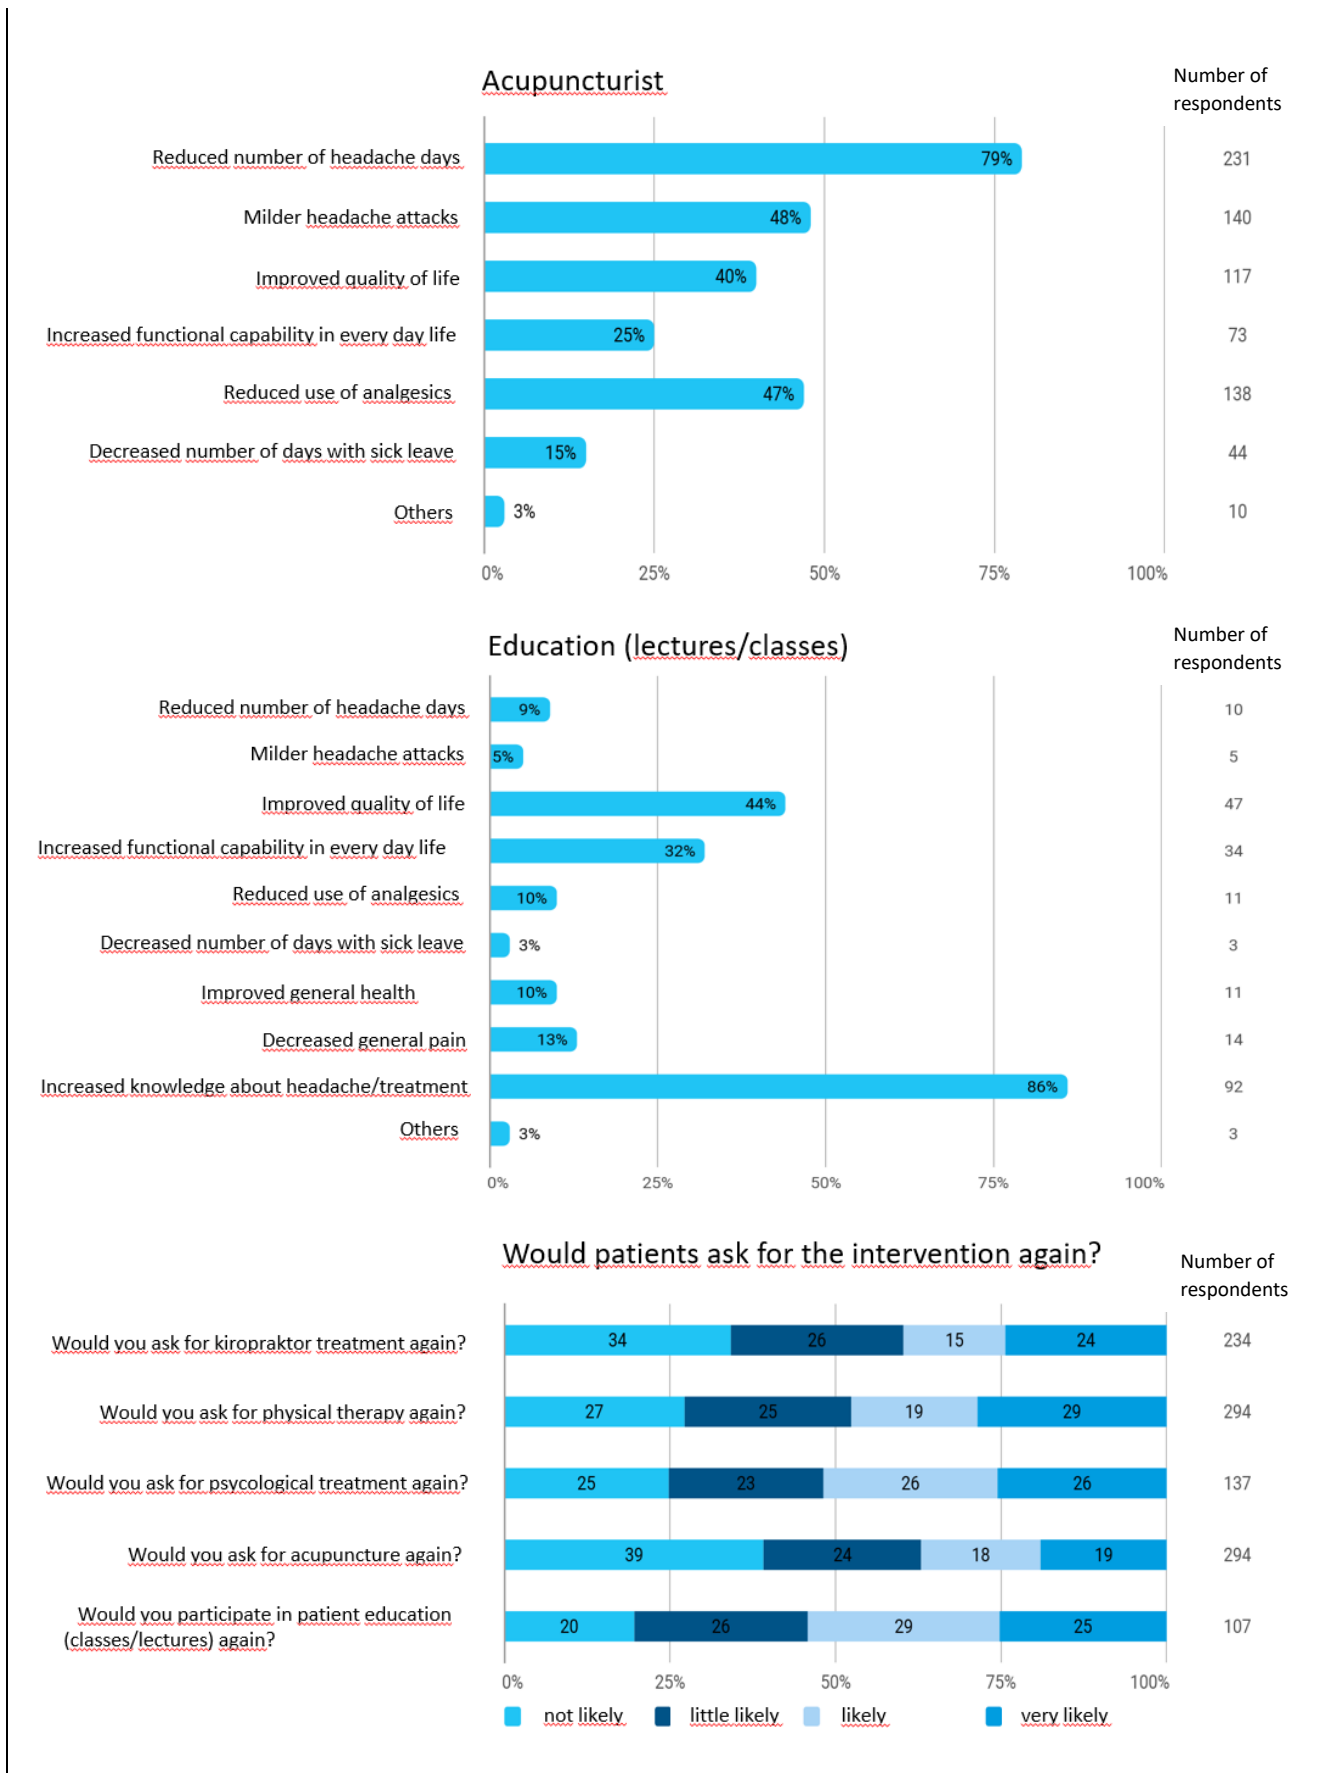

**Fig. 17** Survey of patients' expectations for treatment effects in chiropractor, physiotherapist, psychologist, acupuncturist, and education (lectures/classes), and whether patients would ask for these interventions again.
