# Supplementary material for: Manual joint mobilisation techniques, supervised physical activity, psychological treatment, acupuncture and patient education for patients with tension-type headache. A systematic review and meta-analysis
Source: PubMed Central journal article supplement (PMC8379845; doi:10.1186/s10194-021-01298-4), 2021-08-21
Supplement: 10194_2021_1298_MOESM2_ESM.pdf [file 10194_2021_1298_MOESM2_ESM.pdf]

## SEARCH PROTOCOL

|                          |                                                               |
|--------------------------|---------------------------------------------------------------|
| <b>Project title</b>     | <b>Non-pharmacological treatment of tension-type headache</b> |
| <b>Project manager</b>   | Christel Høst, Nationalt Videnscenter for Hovedpine           |
| <b>Lead</b>              | Louise Ninett Carlsen, Nationalt Videnscenter for Hovedpine   |
| <b>Search specialist</b> | Kirsten Birkefoss, Danish Health Authority, StepChange        |
| <b>Last updated</b>      | 14.07.2020                                                    |

## SEARCH STRATEGY

|                                          |                                                                                                                                                                                                                                                                                                                                                                                                                                                                                            |
|------------------------------------------|--------------------------------------------------------------------------------------------------------------------------------------------------------------------------------------------------------------------------------------------------------------------------------------------------------------------------------------------------------------------------------------------------------------------------------------------------------------------------------------------|
| <b>Tension-type headache</b>             | <p>Should patients with tension-type headache be offered treatment with manual joint-mobilizing techniques besides usual care?</p> <p>Should patients with tension-type headache be offered physical activity?</p> <p>Should patients with tension-type headache be offered psychological treatment?</p> <p>Should patients with tension-type headache be offered acupuncture?</p> <p>Should patients with tension-type headache be offered patient education besides usual treatment?</p> |
| <b>Search terms</b>                      | See search terms in the search protocol below                                                                                                                                                                                                                                                                                                                                                                                                                                              |
| <b>Inclusion and exclusion criterias</b> | <p><u>Language</u>: English, Danish, Norwegian, Swedish</p> <p><u>Pub Year</u>: 2010-2020</p> <p><u>Population</u>: Adults 18 and older</p> <p><u>Publ.types</u>: Guidelines, systematic reviews, meta analyses, randomized controlled trials or controlled trials</p>                                                                                                                                                                                                                     |

## Information sources

| <b>DATABASE</b>                         | <b>INTERFACE</b> |
|-----------------------------------------|------------------|
| <b>Medline (incl. Cochrane Reviews)</b> | OVID             |
| <b>EMBASE (incl. Cochrane Reviews)</b>  | OVID             |
| <b>PsycINFO</b>                         | OVID             |
| <b>CINAHL</b>                           | EBSCO            |
| <b>PEDRO</b>                            | Internet         |
| <b>OT Seeker</b>                        | Internet         |

### Note

- Search terms and inclusion/exclusion criterias are adapted to the different database languages.
- Duplicates have as thoroughly as possible been removed by the help of RefWorks.
- References found has been transferred to Covidence

## Search for systematic reviews and meta analyses

---

### Should patients with tension-type headache be offered treatment with manual joint-mobilizing techniques besides usual care?

Search date: 19.05.2020

#### Medline

Database(s): **Ovid MEDLINE(R) and Epub Ahead of Print, In-Process & Other Non-Indexed Citations, Daily and Versions(R)** 1946 to May 18, 2020

Search Strategy:

| #  | Searches                                                                                                                                                                             |
|----|--------------------------------------------------------------------------------------------------------------------------------------------------------------------------------------|
| 1  | Headache/                                                                                                                                                                            |
| 2  | Headache disorders/                                                                                                                                                                  |
| 3  | Headache Disorders, Primary/                                                                                                                                                         |
| 4  | exp Migraine Disorders/                                                                                                                                                              |
| 5  | exp Tension-Type Headache/                                                                                                                                                           |
| 6  | (headache* or head ache* or head pain or cephalalgia* or cephalgia* or migraine* or Cephalodynia* or cranial pain or hemicranias* or cerebral pain or cranialgia*).ti,bt,ab,kw,kf.   |
| 7  | or/1-6                                                                                                                                                                               |
| 8  | exp Musculoskeletal Manipulations/                                                                                                                                                   |
| 9  | Manipulation, Chiropractic/                                                                                                                                                          |
| 10 | Manipulation, Orthopedic/                                                                                                                                                            |
| 11 | Manipulation, Osteopathic/                                                                                                                                                           |
| 12 | Manipulation, Spinal/                                                                                                                                                                |
| 13 | Osteopathic Medicine/                                                                                                                                                                |
| 14 | exp Physical therapy modalities/                                                                                                                                                     |
| 15 | (adjust* adj6 (chiropract* or spinal or spine or lumbar or cervical or neck or thoracic or instrument* or tool* or electric)).ti,bt,ab,kf.                                           |
| 16 | (HVLA or high velocity low amplitude).ti,bt,ab,kw.                                                                                                                                   |
| 17 | (manipulat* and (chiropract* or naprapath* or osteopath* or oosteopath* or orthopedic* or orthopaedic*)).ti,bt,ab,kf.                                                                |
| 18 | (manipulat* and (spinal or spine or low* back or joint* or lumbar or neck or thoracic or cervical or cervix or MSK or musculoskeletal or musculo-skeletal or vertebr*)).ti,bt,ab,kf. |

|    |                                                                                                                                                                                                                                                                                                                                                                                                                                                                                                                                                                                                                                                                                                                                                                                                                                                                  |
|----|------------------------------------------------------------------------------------------------------------------------------------------------------------------------------------------------------------------------------------------------------------------------------------------------------------------------------------------------------------------------------------------------------------------------------------------------------------------------------------------------------------------------------------------------------------------------------------------------------------------------------------------------------------------------------------------------------------------------------------------------------------------------------------------------------------------------------------------------------------------|
| 19 | (manipulat* and (physiotherap* or physical therap*)).ti,bt,ab,kf.                                                                                                                                                                                                                                                                                                                                                                                                                                                                                                                                                                                                                                                                                                                                                                                                |
| 20 | (manipulat* and technique*).ti,bt,ab,kw,kf.                                                                                                                                                                                                                                                                                                                                                                                                                                                                                                                                                                                                                                                                                                                                                                                                                      |
| 21 | (mobili#at* and (chiropract* or naprapath* or osteopath* or oosteopath* or orthopedic* or orthopaedic* or physical therap* or physiotherap*)).ti,bt,ab,kf.                                                                                                                                                                                                                                                                                                                                                                                                                                                                                                                                                                                                                                                                                                       |
| 22 | (mobili#at* and (spinal or spine or low* back or joint* or lumbar or neck or thoracic or cervical or cervix or MSK or musculoskeletal or musculo-skeletal or vertebr*)).ti,bt,ab,kf.                                                                                                                                                                                                                                                                                                                                                                                                                                                                                                                                                                                                                                                                             |
| 23 | ((manual or manipulat* or mobili#at* or MSK or movement or musculoskeletal or musculo-skeletal or neurorehabilitati* or neuro-rehabilitati* or physical) adj6 (therap* or treat* or intervention* or action* or program* or strateg* or protocol* or support* or approach* or evaluation)).ti,bt,ab,kf.                                                                                                                                                                                                                                                                                                                                                                                                                                                                                                                                                          |
| 24 | OMT.ti,bt,ab,kw,kf.                                                                                                                                                                                                                                                                                                                                                                                                                                                                                                                                                                                                                                                                                                                                                                                                                                              |
| 25 | ((trigger point or motion or passive or cpm) adj2 therap*).ti,bt,ab,kw,kf.                                                                                                                                                                                                                                                                                                                                                                                                                                                                                                                                                                                                                                                                                                                                                                                       |
| 26 | (traction adj3 (manual or passive or mechanical or non-surgical or nonsurgical)).ti,bt,ab,kf.                                                                                                                                                                                                                                                                                                                                                                                                                                                                                                                                                                                                                                                                                                                                                                    |
| 27 | (flexion-distraction or flexion distraction).ti,bt,ab,kf.                                                                                                                                                                                                                                                                                                                                                                                                                                                                                                                                                                                                                                                                                                                                                                                                        |
| 28 | (activator adj3 (method* or technique* or instrument*)).ti,bt,ab,kf.                                                                                                                                                                                                                                                                                                                                                                                                                                                                                                                                                                                                                                                                                                                                                                                             |
| 29 | ((mechanical or Alexander or Atlas Orthogonal or Atlas Specific or Bilateral Nasal Specific or Blair Upper Cervical or Chiropractic Manipulative Reflex or Cox or Derifield-Thompson or Directional Non-Force or Diversified or Endo-Nasal or feldenkrais or William or Flexion-Distraction or Full Spine or Gonstead or Grostic or Harrison or Koren Specific or Logan Basic or McTimoney or Maitland or Mulligan or muligan or Neuro Emotional or NUCCA or Palmer or Pierce-Stillwagon or Sacro Occipital or Thompson Terminal Point or Toftness or Toggle Recoil or Torque Release or Webster or muscle energy) adj1 (Technique* or model* or tool* or exercise* or therapy)).ti,bt,ab,kw,kf.                                                                                                                                                                 |
| 30 | (reflexolog* or cyriax or High velocity or low amplitude or Subluxation or Joint dysfunction or hypomobility or muscle energy technique* or therapeutic touch or stretching or acupressure).ti,bt,ab,kw,kf.                                                                                                                                                                                                                                                                                                                                                                                                                                                                                                                                                                                                                                                      |
| 31 | (vibration adj5 (therap* or treatment*)).ti,bt,ab,kw,kf.                                                                                                                                                                                                                                                                                                                                                                                                                                                                                                                                                                                                                                                                                                                                                                                                         |
| 32 | ((non-pharma* or nonpharma* or non pharma* or non-drug or nondrug or non drug or non-surgical or nonsurgical or non surgical or non-surgery or nonsurgery or non surgery or non-invasive or noninvasive or non invasive or complimentary or integrat* or holistic or multi-modal* or multimodal* or Multidisciplinary or Multi-disciplinary or Interdisciplinary or Inter-disciplinary or complex or multimodal* or multi-modal* or cross-disciplinary or crossdisciplinary or multi-dimensional or multidimensional or biopsychosocial or bio-psycho-social or multi-facet* or multifacet* or comprehensive or multiple or addition* or physiotherapy or physical therap*) adj6 (therap* or treat* or intervention* or action* or program* or strateg* or protocol* or support* or approach* or evaluation or rehabilitation or care or session*)).ti,bt,kw,kf. |
| 33 | or/8-32                                                                                                                                                                                                                                                                                                                                                                                                                                                                                                                                                                                                                                                                                                                                                                                                                                                          |
| 34 | 7 and 33                                                                                                                                                                                                                                                                                                                                                                                                                                                                                                                                                                                                                                                                                                                                                                                                                                                         |

|    |                                                                                                                                                                                                                                     |
|----|-------------------------------------------------------------------------------------------------------------------------------------------------------------------------------------------------------------------------------------|
| 35 | limit 34 to (guideline or practice guideline or systematic reviews or meta analysis)                                                                                                                                                |
| 36 | ((systematic or rapid or integrative or umbrella) adj3 (review* or overview* or study or studies or search* or approach* or analys*)) or guideline* or recommendations or meta analy* or meta-analy* or metaanaly*).ti,bt,ab,kw,kf. |
| 37 | ((pool* or combin*) adj1 (data or analys*)).ti,ab.                                                                                                                                                                                  |
| 38 | (pubmed or medline or embase or cochrane or "web of science" or psycinfo or psychinfo or scopus).ti,ab.                                                                                                                             |
| 39 | cochrane.jw.                                                                                                                                                                                                                        |
| 40 | Network meta-analysis/                                                                                                                                                                                                              |
| 41 | ((multiple or mixed) adj1 (treatment* or therap*) adj1 comparison*) or (indirect adj1 comparison*).ti,bt,ab,kw,kf.                                                                                                                  |
| 42 | or/36-41                                                                                                                                                                                                                            |
| 43 | 34 and 42                                                                                                                                                                                                                           |
| 44 | 35 or 43                                                                                                                                                                                                                            |

## Embase

Database(s): **Embase** 1974 to 2020 May 18

Search Strategy:

| #  | Searches                                                                                                                                                                                                           |
|----|--------------------------------------------------------------------------------------------------------------------------------------------------------------------------------------------------------------------|
| 1  | Headache/                                                                                                                                                                                                          |
| 2  | "headache and facial pain"/                                                                                                                                                                                        |
| 3  | exp migraine/                                                                                                                                                                                                      |
| 4  | exp tension headache/                                                                                                                                                                                              |
| 5  | exp chronic daily headache/                                                                                                                                                                                        |
| 6  | primary headache/                                                                                                                                                                                                  |
| 7  | stabbing headache/                                                                                                                                                                                                 |
| 8  | (headache* or head ache* or head pain or cephalalgia* or cephalgia* or migraine* or Cephalodynia* or cranial pain or hemicranias* or cerebral pain or cranialgia* or trigeminal-autonomic- cephalalgia*).ti,ab,kw. |
| 9  | or/1-8                                                                                                                                                                                                             |
| 10 | exp musculoskeletal manipulation/                                                                                                                                                                                  |
| 11 | exp physiotherapy/                                                                                                                                                                                                 |
| 12 | (adjust* adj6 (chiropract* or spinal or spine or lumbar or cervical or neck or thoracic or instrument* or tool* or electric)).ti,ab,kw.                                                                            |

|    |                                                                                                                                                                                                                                                                                                                                                                                                                                                                                                                                                                                                                                                                                                     |
|----|-----------------------------------------------------------------------------------------------------------------------------------------------------------------------------------------------------------------------------------------------------------------------------------------------------------------------------------------------------------------------------------------------------------------------------------------------------------------------------------------------------------------------------------------------------------------------------------------------------------------------------------------------------------------------------------------------------|
| 13 | (HVLA or high velocity low amplitude).ti,ab,kw.                                                                                                                                                                                                                                                                                                                                                                                                                                                                                                                                                                                                                                                     |
| 14 | (manipulat* and (chiropract* or naprapath* or osteopath* or oosteopath* or orthopedic* or orthopaedic*)).ti,ab,kw.                                                                                                                                                                                                                                                                                                                                                                                                                                                                                                                                                                                  |
| 15 | (manipulat* and (spinal or spine or low* back or joint* or lumbar or neck or thoracic or cervical or cervix or MSK or musculoskeletal or musculo-skeletal or vertebr*)).ti,ab,kw.                                                                                                                                                                                                                                                                                                                                                                                                                                                                                                                   |
| 16 | (manipulat* and (physiotherap* or physical therap*)).ti,ab,kw.                                                                                                                                                                                                                                                                                                                                                                                                                                                                                                                                                                                                                                      |
| 17 | (manipulat* and technique*).ti,ab,kw.                                                                                                                                                                                                                                                                                                                                                                                                                                                                                                                                                                                                                                                               |
| 18 | (mobili?at* and (chiropract* or naprapath* or osteopath* or orthopedic* or orthopaedic* or physical therap* or physiotherap*)).ti,ab,kw.                                                                                                                                                                                                                                                                                                                                                                                                                                                                                                                                                            |
| 19 | (mobili?at* and (spinal or spine or low* back or joint* or lumbar or neck or thoracic or cervical or MSK or musculoskeletal or vertebr*)).ti,ab,kw.                                                                                                                                                                                                                                                                                                                                                                                                                                                                                                                                                 |
| 20 | ((manual or manipulat* or mobili?at* or MSK or musculoskeletal or musculo-skeletal or neurorehabilitati* or neuro-rehabilitati* or physical) adj6 (therap* or treat* or intervention* or action* or program* or strateg* or protocol* or support* or approach* or evaluation)).ti,ab,kw.                                                                                                                                                                                                                                                                                                                                                                                                            |
| 21 | (traction adj3 (manual or passive or mechanical or non-surgical or nonsurgical)).ti,ab,kw.                                                                                                                                                                                                                                                                                                                                                                                                                                                                                                                                                                                                          |
| 22 | (flexion-distraction or flexion distraction).ti,ab,kw.                                                                                                                                                                                                                                                                                                                                                                                                                                                                                                                                                                                                                                              |
| 23 | ((activator or physiotherapy or physical therapy) adj3 (method* or technique* or instrument*)).ti,ab,kw.                                                                                                                                                                                                                                                                                                                                                                                                                                                                                                                                                                                            |
| 24 | ((mechanical or Alexander or Atlas Orthogonal or Atlas Specific or Bilateral Nasal Specific or Blair Upper Cervical or Chiropractic Manipulative Reflex or Cox or Derifield-Thompson or Directional Non-Force or Diversified or Endo-Nasal or feldenkrais or William or Flexion-Distraction or Full Spine or Gonstead or Grostic or Harrison or Koren Specific or Logan Basic or McTimoney or Maitland or Mulligan or muligan or Neuro Emotional or NUCCA or Palmer or Pierce-Stillwagon or Sacro Occipital or Thompson Terminal Point or Toftness or Toggle Recoil or Torque Release or Webster or muscle energy) adj1 (Technique* or model* or tool* or exercise* or therapy)).ti,ab,kw.          |
| 25 | (reflexolog* or cyriax or High velocity or low amplitude or Subluxation or Joint dysfunction or hypomobility or muscle energy technique* or therapeutic touch or stretching or acupressure).ti,ab,kw.                                                                                                                                                                                                                                                                                                                                                                                                                                                                                               |
| 26 | OMT.ti,ab,kw.                                                                                                                                                                                                                                                                                                                                                                                                                                                                                                                                                                                                                                                                                       |
| 27 | (vibration adj5 (therap* or treatment*)).ti,ab,kw.                                                                                                                                                                                                                                                                                                                                                                                                                                                                                                                                                                                                                                                  |
| 28 | ((non-pharma* or nonpharma* or non pharma* or non-drug or nondrug or non drug or non-surgical or nonsurgical or non surgical or non-surgery or nonsurgery or non surgery or non-invasive or noninvasive or non invasive or complimentary or integrat* or holistic or multi-modal* or multimodal* or Multidisciplinary or Multi-disciplinary or Interdisciplinary or Inter-disciplinary or complex or multimodal* or multi-modal* or cross-disciplinary or crossdisciplinary or multi-dimensional or multidimensional or biopsychosocial or bio-psycho-social or multi-facet* or multifacet* or comprehensive or multiple or addition* or physiotherapy or physical therap*) adj6 (therap* or treat* |

|    |                                                                                                                                                                                                                               |
|----|-------------------------------------------------------------------------------------------------------------------------------------------------------------------------------------------------------------------------------|
|    | or intervention* or action* or program* or strateg* or protocol* or support* or approach* or evaluation or rehabilitation or care or session*)).ti,kw.                                                                        |
| 29 | or/10-28                                                                                                                                                                                                                      |
| 30 | 9 and 29                                                                                                                                                                                                                      |
| 31 | limit 30 to ("systematic review" or meta analysis)                                                                                                                                                                            |
| 32 | ((systematic or rapid or integrative or umbrella) adj3 (review* or overview* or study or studies or search* or approach* or analys*)) or guideline* or recommendations or meta analy* or meta-analy* or metaanaly*).ti,ab,kw. |
| 33 | ((pool* or combin*) adj1 (data or analys*)).ti,ab.                                                                                                                                                                            |
| 34 | (pubmed or medline or embase or cochrane or "web of science" or psycinfo or psychinfo or scopus).ti,ab.                                                                                                                       |
| 35 | cochrane.jx.                                                                                                                                                                                                                  |
| 36 | Network meta-analysis/                                                                                                                                                                                                        |
| 37 | ((multiple or mixed) adj1 (treatment* or therap*) adj1 comparison*) or (indirect adj1 comparison*).ti,ab,kw.                                                                                                                  |
| 38 | or/32-37                                                                                                                                                                                                                      |
| 39 | 30 and 38                                                                                                                                                                                                                     |
| 40 | 31 or 39                                                                                                                                                                                                                      |

## Cinahl

| #   | Query                                                                                                                                                                                                             | Limiters/Expanders                            |
|-----|-------------------------------------------------------------------------------------------------------------------------------------------------------------------------------------------------------------------|-----------------------------------------------|
| S22 | S16 AND S21                                                                                                                                                                                                       | Language: Danish, English, Norwegian, Swedish |
| S21 | S17 OR S18 OR S19 OR S20                                                                                                                                                                                          |                                               |
| S20 | ((multiple or mixed) adj1 (treatment* or therap*) N1 comparison*) or (indirect N1 comparison*)                                                                                                                    |                                               |
| S19 | (pool* N1 (data or analys*))                                                                                                                                                                                      |                                               |
| S18 | ((systematic or rapid or integrative or umbrella) N3 (review* or overview* or study or studies or search* or approach* or analys*)) or guideline* or recommendations or meta analy* or meta-analy* or metaanaly*) |                                               |
| S17 | PT (Systematic Review or Meta Analysis) or MH ("Systematic Review+" or "Meta Analysis+")                                                                                                                          |                                               |
| S16 | S4 AND S15                                                                                                                                                                                                        |                                               |

|     |                                                                                                                                                                                                                                                                                                                                                                                                                                                                                                                                                                                                                                                                                                                                                                                                                                      |  |
|-----|--------------------------------------------------------------------------------------------------------------------------------------------------------------------------------------------------------------------------------------------------------------------------------------------------------------------------------------------------------------------------------------------------------------------------------------------------------------------------------------------------------------------------------------------------------------------------------------------------------------------------------------------------------------------------------------------------------------------------------------------------------------------------------------------------------------------------------------|--|
| S15 | S5 OR S6 OR S7 OR S8 OR S9 OR S10 OR S11 OR S12 OR S13 OR S14                                                                                                                                                                                                                                                                                                                                                                                                                                                                                                                                                                                                                                                                                                                                                                        |  |
| S14 | ((non-pharma* or nonpharma* or non pharma* or non-drug or nondrug or non drug or non-surgical or nonsurgical or non surgical or non-surgery or nonsurgery or non surgery or non-invasive or noninvasive or non invasive or complimentary or integrat* or holistic or multi-modal* or multimodal* or Multidisciplinary or Multi-disciplinary or Interdisciplinary or Inter-disciplinary or complex or multimodal* or multi-modal* or cross-disciplinary or crossdisciplinary or multi-dimensional or multidimensional or biopsychosocial or bio-psycho-social or multi-facet* or multifacet* or comprehensive or multiple or physiotherapy or physical therap*) N6 (therap* or treat* or intervention* or action* or program* or strateg* or protocol* or support* or approach* or evaluation or rehabilitation or care or session*)) |  |
| S13 | (vibration N5 (therap* or treatment*))                                                                                                                                                                                                                                                                                                                                                                                                                                                                                                                                                                                                                                                                                                                                                                                               |  |
| S12 | reflexolog* or cyriax or High velocity or low amplitude or Subluxation or Joint dysfunction or hypomobility or muscle energy technique* or therapeutic touch or stretching or acupressure                                                                                                                                                                                                                                                                                                                                                                                                                                                                                                                                                                                                                                            |  |
| S11 | ((mechanical or Alexander or Atlas Orthogonal or Atlas Specific or Bilateral Nasal Specific or Blair Upper Cervical or Chiropractic Manipulative Reflex or Cox or Derifield-Thompson or Directional Non-Force or Diversified or Endo-Nasal or feldenkrais or William or Flexion-Distracton or Full Spine or Gonstead or Grostic or Harrison or Koren Specific or Logan Basic or McTimoney or Maitland or Mulligan or muligan or Neuro Emotional or NUCCA or Palmer or Pierce-Stillwagun or Sacro Occipital or Thompson Terminal Point or Toftness or Toggle Recoil or Torque Release or Webster or muscle energy or physical therapy or physiotherapy) N1 (Technique* or model* or tool* or exercise* or therapy))                                                                                                                   |  |
| S10 | ((manual or manipul* or mobili?at* or MSK or musculoskeletal or musculo-skeletal or neurorehabilitati* or neuro-rehabilitati* or physical) N6 (therap* or treat* or intervention* or action* or program* or strateg* or protocol* or support* or approach* or evaluation or session*)) or ((traction N3 (manual or passive or mechanical or non-surgical or nonsurgical))) or (activator N3 (method* or technique* or instrument*))                                                                                                                                                                                                                                                                                                                                                                                                  |  |
| S9  | (mobili?at* and (chiropract* or naprapath* or osteopath* or oosteopath* or orthopedic* or orthopaedic* or spinal or spine or low* back or joint* or lumbar or neck or thoracic or cervical or cervix or MSK or musculoskeletal or musculo-skeletal or vertebr*))                                                                                                                                                                                                                                                                                                                                                                                                                                                                                                                                                                     |  |

|    |                                                                                                                                                                                                                                                                                                                     |  |
|----|---------------------------------------------------------------------------------------------------------------------------------------------------------------------------------------------------------------------------------------------------------------------------------------------------------------------|--|
| S8 | (manipulat* and (chiropract* or naprapath* or osteopath* or oosteopath* or orthopedic* or orthopaedic* or spinal or spine or low* back or joint* or lumbar or neck or thoracic or cervical or cervix or MSK or musculoskeletal or musculo-skeletal or vertebr* or physiotherap* or physical therap* or technique*)) |  |
| S7 | HVLA or high velocity low amplitude or flexion-distraction or flexion distraction                                                                                                                                                                                                                                   |  |
| S6 | (adjust* N6 (chiropract* or spinal or spine or lumbar or cervical or neck or thoracic or instrument* or tool* or electric))                                                                                                                                                                                         |  |
| S5 | MH "Physical therapy" or MH "Manual therapy+" or MH "Joint mobilization"                                                                                                                                                                                                                                            |  |
| S4 | S1 OR S2 OR S3                                                                                                                                                                                                                                                                                                      |  |
| S3 | SU (headache* or head ache* or head pain or cephalalgia* or cephalgia* or migraine* or Cephalodynia* or cranial pain or hemicranias* or cerebral pain or cranialgia*)                                                                                                                                               |  |
| S2 | (headache* or head ache* or head pain or cephalalgia* or cephalgia* or migraine* or Cephalodynia* or cranial pain or hemicranias* or cerebral pain or cranialgia*)                                                                                                                                                  |  |
| S1 | MH "Headache" or MH "Headache, Primary" or MH "Migraine" or MH "Tension headache"                                                                                                                                                                                                                                   |  |

**PEDRO**

Abstract & Title: headache or migraine\*

Method: Practice guideline or Systematic review



## Should patients with tension-type headache be offered physical activity?

Search date: 19.05.2020

### Medline

Database(s): **Ovid MEDLINE(R) and Epub Ahead of Print, In-Process & Other Non-Indexed Citations, Daily and Versions(R)** 1946 to May 18, 2020

Search Strategy:

| #  | Searches                                                                                                                                                                           |
|----|------------------------------------------------------------------------------------------------------------------------------------------------------------------------------------|
| 1  | Headache/                                                                                                                                                                          |
| 2  | Headache disorders/                                                                                                                                                                |
| 3  | Headache Disorders, Primary/                                                                                                                                                       |
| 4  | exp Migraine Disorders/                                                                                                                                                            |
| 5  | exp Tension-Type Headache/                                                                                                                                                         |
| 6  | (headache* or head ache* or head pain or cephalalgia* or cephalgia* or migraine* or Cephalodynia* or cranial pain or hemicranias* or cerebral pain or cranialgia*).ti,bt,ab,kw,kf. |
| 7  | or/1-6                                                                                                                                                                             |
| 8  | exp exercise/                                                                                                                                                                      |
| 9  | exp exercise therapy/                                                                                                                                                              |
| 10 | exp Sports/                                                                                                                                                                        |
| 11 | exp Physical Exertion/                                                                                                                                                             |
| 12 | exp Muscle strength/                                                                                                                                                               |
| 13 | exp Exercise Movement Techniques/                                                                                                                                                  |
| 14 | exp "Physical Education and Training"/                                                                                                                                             |
| 15 | Weight-Bearing/                                                                                                                                                                    |
| 16 | Tai Ji/                                                                                                                                                                            |
| 17 | Yoga/                                                                                                                                                                              |
| 18 | Qigong/                                                                                                                                                                            |
| 19 | physical therapy modalities/                                                                                                                                                       |
| 20 | (exercis* or train* or stepped care or physical therap* or physiotherap* or kinesiotherapy).ti,bt,kw,kf.                                                                           |
| 21 | (physical adj1 (education or program*)).ti,bt,ab,kw,kf.                                                                                                                            |
| 22 | (exercise adj3 (session* or training or technique* or physical or isometric or therap* or program* or class*)).ti,bt,ab,kw,kf.                                                     |

|    |                                                                                                                                                                                                                                                                                                                                                                                                                                                                                                                                                                                                                                                                                                                                                                                                                                                      |
|----|------------------------------------------------------------------------------------------------------------------------------------------------------------------------------------------------------------------------------------------------------------------------------------------------------------------------------------------------------------------------------------------------------------------------------------------------------------------------------------------------------------------------------------------------------------------------------------------------------------------------------------------------------------------------------------------------------------------------------------------------------------------------------------------------------------------------------------------------------|
| 23 | ((muscl* or resistance or physical or endurance or strength* or balance or postur* or gait or threshold* or treadmill* or aquatic* or trunk or graded or gradual or progressive or controlled or incremented or symptom-based or symptombased or symptom based or guided or supervis* or coached or coaching or stepped care or stepwise or step-wise) adj3 (train* or retrain* or re-train* or exercise* or rehabilitation or strength* or fit* or condition* or exposure or activit* or exertion or load* or physical therap* or physiotherap*)).ti,bt,ab,kw,kf.                                                                                                                                                                                                                                                                                   |
| 24 | (active rehabilitation or aerobic* or anaerobic* or movement therapy or watergym* or water gym* or aquagym or gym* or hydrotherap* or (warm water adj4 (exercis* or train* or rehab*)) or pilates).ti,bt,ab,kw,kf.                                                                                                                                                                                                                                                                                                                                                                                                                                                                                                                                                                                                                                   |
| 25 | (running or Skate* or skating or skiing or Jog* or zumba or kettlebelt or Swim* or Bicycl* or cycling or bicycling or fitness bike* or exercise bike* or spinning or walk* or rowing or rower or water-rower* or waterrower* or cross-train* or crosstrain* or pacing or paced or titreted or (weight* adj3 (lift* or train* or exercis*))).ti,bt,ab,kw,kf.                                                                                                                                                                                                                                                                                                                                                                                                                                                                                          |
| 26 | (yoga or tai ji or tai chi or qigong or qi-gong or pilates*).ti,bt,ab,kw,kf.                                                                                                                                                                                                                                                                                                                                                                                                                                                                                                                                                                                                                                                                                                                                                                         |
| 27 | ((mckenzie or mechanical or Alexander or William or Feldenkrais) adj2 (technique* or model* or tool* or exercise* or therapy)).ti,bt,ab,kw,kf.                                                                                                                                                                                                                                                                                                                                                                                                                                                                                                                                                                                                                                                                                                       |
| 28 | (neurorehabilitati* or neuro-rehabilitati*).ti,bt,ab,kw,kf.                                                                                                                                                                                                                                                                                                                                                                                                                                                                                                                                                                                                                                                                                                                                                                                          |
| 29 | ((non-pharma* or nonpharma* or non pharma* or non-drug or nondrug or non drug or non-surgical or nonsurgical or non surgical or non-surgery or nonsurgery or non surgery or non-invasive or noninvasive or non invasive or complimentary or integrat* or holistic or multi-modal* or multimodal* or Multidisciplinary or Multi-disciplinary or Interdisciplinary or Inter-disciplinary or complex or multimodal* or multi-modal* or cross-disciplinary or crossdisciplinary or multi-dimensional or multidimensional or biopsychosocial or bio-psycho-social or multi-facet* or multifacet* or comprehensive or multiple or addition* or physiotherapy or physical therap*) adj6 (therap* or treat* or intervention* or action* or program* or strateg* or protocol* or support* or approach* or evaluation or rehabilitation or care)).ti,bt,kw,kf. |
| 30 | or/8-29                                                                                                                                                                                                                                                                                                                                                                                                                                                                                                                                                                                                                                                                                                                                                                                                                                              |
| 31 | 7 and 30                                                                                                                                                                                                                                                                                                                                                                                                                                                                                                                                                                                                                                                                                                                                                                                                                                             |
| 32 | limit 31 to (guideline or practice guideline or systematic reviews or meta analysis)                                                                                                                                                                                                                                                                                                                                                                                                                                                                                                                                                                                                                                                                                                                                                                 |
| 33 | ((systematic or rapid or integrative or umbrella) adj3 (review* or overview* or study or studies or search* or approach* or analys*)) or guideline* or recommendations or meta analy* or meta-analy* or metaanaly*).ti,bt,ab,kw,kf.                                                                                                                                                                                                                                                                                                                                                                                                                                                                                                                                                                                                                  |
| 34 | (pool* adj1 (data or analys*)).ti,ab.                                                                                                                                                                                                                                                                                                                                                                                                                                                                                                                                                                                                                                                                                                                                                                                                                |
| 35 | (pubmed or medline or embase or cochrane or "web of science" or psycinfo or psychinfo or scopus).ti,ab.                                                                                                                                                                                                                                                                                                                                                                                                                                                                                                                                                                                                                                                                                                                                              |
| 36 | cochrane.jw.                                                                                                                                                                                                                                                                                                                                                                                                                                                                                                                                                                                                                                                                                                                                                                                                                                         |
| 37 | Network meta-analysis/                                                                                                                                                                                                                                                                                                                                                                                                                                                                                                                                                                                                                                                                                                                                                                                                                               |

|    |                                                                                                                    |
|----|--------------------------------------------------------------------------------------------------------------------|
| 38 | ((multiple or mixed) adj1 (treatment* or therap*) adj1 comparison*) or (indirect adj1 comparison*).ti,bt,ab,kw,kf. |
| 39 | or/33-38                                                                                                           |
| 40 | 31 and 39                                                                                                          |
| 41 | 32 or 40                                                                                                           |

## Embase

Database(s): **Embase** 1974 to 2020 May 18

Search Strategy:

| #  | Searches                                                                                                                                                                     |
|----|------------------------------------------------------------------------------------------------------------------------------------------------------------------------------|
| 1  | Headache/                                                                                                                                                                    |
| 2  | "headache and facial pain"/                                                                                                                                                  |
| 3  | exp migraine/                                                                                                                                                                |
| 4  | exp tension headache/                                                                                                                                                        |
| 5  | exp chronic daily headache/                                                                                                                                                  |
| 6  | primary headache/                                                                                                                                                            |
| 7  | stabbing headache/                                                                                                                                                           |
| 8  | (headache* or head ache* or head pain or cephalalgia* or cephalgia* or migraine* or Cephalodynia* or cranial pain or hemicranias* or cerebral pain or cranialgia*).ti,ab,kw. |
| 9  | or/1-8                                                                                                                                                                       |
| 10 | exp exercise/                                                                                                                                                                |
| 11 | exp kinesiotherapy/                                                                                                                                                          |
| 12 | exp Physical Exertion/                                                                                                                                                       |
| 13 | exp Muscle strength/                                                                                                                                                         |
| 14 | exp Exercise Movement Techniques/                                                                                                                                            |
| 15 | exp "Physical Education and Training"/                                                                                                                                       |
| 16 | Weight-Bearing/                                                                                                                                                              |
| 17 | Tai Ji/                                                                                                                                                                      |
| 18 | Yoga/                                                                                                                                                                        |
| 19 | Qigong/                                                                                                                                                                      |
| 20 | physiotherapy/                                                                                                                                                               |
| 21 | (exercis* or train* or stepped care or physical therap* or physiotherap* or kinesiotherapy).ti,kw.                                                                           |

|    |                                                                                                                                                                                                                                                                                                                                                                                                                                                                                                                                                                                                                                                                                                                                                                                                                                                            |
|----|------------------------------------------------------------------------------------------------------------------------------------------------------------------------------------------------------------------------------------------------------------------------------------------------------------------------------------------------------------------------------------------------------------------------------------------------------------------------------------------------------------------------------------------------------------------------------------------------------------------------------------------------------------------------------------------------------------------------------------------------------------------------------------------------------------------------------------------------------------|
| 22 | (physical adj1 (education or program*)).ti,ab,kw.                                                                                                                                                                                                                                                                                                                                                                                                                                                                                                                                                                                                                                                                                                                                                                                                          |
| 23 | (exercise adj3 (session* or training or technique* or physical or isometric or therap* or program* or class*)).ti,ab,kw.                                                                                                                                                                                                                                                                                                                                                                                                                                                                                                                                                                                                                                                                                                                                   |
| 24 | ((muscl* or resistance or physical or endurance or strength* or balance or postur* or gait or threshold* or treadmill* or aquatic* or trunk or graded or gradual or progressive or controlled or incremented or symptom-based or symptombased or symptom based or guided or supervis* or coached or coaching or stepped care or stepwise or step-wise) adj3 (train* or retrain* or re-train* or exercise* or rehabilitation or strength* or fit* or condition* or exposure or activit* or exertion or load* or physical therap* or physiotherap*)).ti,ab,kw.                                                                                                                                                                                                                                                                                               |
| 25 | (active rehabilitation or aerobic* or anaerobic* or movement therapy or watergym* or water gym* or aquagym or gym* or hydrotherap* or (warm water adj4 (exercis* or train* or rehab))).ti,ab,kw.                                                                                                                                                                                                                                                                                                                                                                                                                                                                                                                                                                                                                                                           |
| 26 | (running or Skate* or skating or skiing or Jog* or zumba or kettlebelt or Swim* or Bicycl* or cycling or bicycling or fitness bike* or exercise bike* or spinning or walk* or rowing or rower or water-rower* or waterrower* or cross-train* or crosstrain* or pacing or paced or titreted or (weight* adj3 (lift* or train* or exercis*))).ti,ab,kw.                                                                                                                                                                                                                                                                                                                                                                                                                                                                                                      |
| 27 | (yoga or tai ji or tai chi or qigong or qi-gong or pilates).ti,ab,kw.                                                                                                                                                                                                                                                                                                                                                                                                                                                                                                                                                                                                                                                                                                                                                                                      |
| 28 | ((mckenzie or mechanical or Alexander or William or Feldenkrais) adj2 (technique* or model* or tool* or exercise* or therapy)).ti,ab,kw.                                                                                                                                                                                                                                                                                                                                                                                                                                                                                                                                                                                                                                                                                                                   |
| 29 | (neurorehabilitati* or neuro-rehabilitati*).ti,ab,kw.                                                                                                                                                                                                                                                                                                                                                                                                                                                                                                                                                                                                                                                                                                                                                                                                      |
| 30 | ((non-pharma* or nonpharma* or non pharma* or non-drug or nondrug or non drug or non-surgical or nonsurgical or non surgical or non-surgery or nonsurgery or non surgery or non-invasive or noninvasive or non invasive or complimentary or integrat* or holistic or multi-modal* or multimodal* or Multidisciplinary or Multi-disciplinary or Interdisciplinary or Inter-disciplinary or complex or multimodal* or multi-modal* or cross-disciplinary or crossdisciplinary or multi-dimensional or multidimensional or biopsychosocial or bio-psycho-social or multi-facet* or multifacet* or comprehensive or multiple or addition* or physiotherapy or physical therap*) adj3 (therap* or treat* or intervention* or action* or program* or strateg* or protocol* or support* or approach* or evaluation or rehabilitation or care or session*)).ti,kw. |
| 31 | or/10-30                                                                                                                                                                                                                                                                                                                                                                                                                                                                                                                                                                                                                                                                                                                                                                                                                                                   |
| 32 | 9 and 31                                                                                                                                                                                                                                                                                                                                                                                                                                                                                                                                                                                                                                                                                                                                                                                                                                                   |
| 33 | limit 32 to ("systematic review" or meta analysis)                                                                                                                                                                                                                                                                                                                                                                                                                                                                                                                                                                                                                                                                                                                                                                                                         |
| 34 | ((systematic or rapid or integrative or umbrella) adj3 (review* or overview* or study or studies or search* or approach* or analys*)) or guideline* or recommendations or meta analy* or meta-analy* or metaanaly*).ti,ab,kw.                                                                                                                                                                                                                                                                                                                                                                                                                                                                                                                                                                                                                              |
| 35 | ((pool* or combin*) adj1 (data or analys*)).ti,ab.                                                                                                                                                                                                                                                                                                                                                                                                                                                                                                                                                                                                                                                                                                                                                                                                         |
| 36 | (pubmed or medline or embase or cochrane or "web of science" or psycinfo or psychinfo or scopus).ti,ab.                                                                                                                                                                                                                                                                                                                                                                                                                                                                                                                                                                                                                                                                                                                                                    |

|    |                                                                                                              |
|----|--------------------------------------------------------------------------------------------------------------|
| 37 | cochrane.jx.                                                                                                 |
| 38 | Network meta-analysis/                                                                                       |
| 39 | ((multiple or mixed) adj1 (treatment* or therap*) adj1 comparison*) or (indirect adj1 comparison*).ti,ab,kw. |
| 40 | or/34-39                                                                                                     |
| 41 | 32 and 40                                                                                                    |
| 42 | 33 or 41                                                                                                     |

## Cinahl

| #   | Query                                                                                                                                                                                                                                                                                                                                                                                                                                                                                                                                                                                                                                                                                                 | Limiters/Expanders                            |
|-----|-------------------------------------------------------------------------------------------------------------------------------------------------------------------------------------------------------------------------------------------------------------------------------------------------------------------------------------------------------------------------------------------------------------------------------------------------------------------------------------------------------------------------------------------------------------------------------------------------------------------------------------------------------------------------------------------------------|-----------------------------------------------|
| S22 | S16 AND S21                                                                                                                                                                                                                                                                                                                                                                                                                                                                                                                                                                                                                                                                                           | Language: Danish, English, Norwegian, Swedish |
| S21 | S17 OR S18 OR S19 OR S20                                                                                                                                                                                                                                                                                                                                                                                                                                                                                                                                                                                                                                                                              |                                               |
| S20 | ((multiple or mixed) adj1 (treatment* or therap*) N1 comparison*) or (indirect N1 comparison*)                                                                                                                                                                                                                                                                                                                                                                                                                                                                                                                                                                                                        |                                               |
| S19 | (pool* N1 (data or analys*))                                                                                                                                                                                                                                                                                                                                                                                                                                                                                                                                                                                                                                                                          |                                               |
| S18 | ((systematic or rapid or integrative or umbrella) N3 (review* or overview* or study or studies or search* or approach* or analys*)) or guideline* or recommendations or meta analy* or meta-analy* or metaanaly*)                                                                                                                                                                                                                                                                                                                                                                                                                                                                                     |                                               |
| S17 | PT (Systematic Review or Meta Analysis) or MH ("Systematic Review+" or "Meta Analysis+")                                                                                                                                                                                                                                                                                                                                                                                                                                                                                                                                                                                                              |                                               |
| S16 | S4 AND S15                                                                                                                                                                                                                                                                                                                                                                                                                                                                                                                                                                                                                                                                                            |                                               |
| S15 | S5 OR S6 OR S7 OR S8 OR S9 OR S10 OR S11 OR S12 OR S13 OR S14                                                                                                                                                                                                                                                                                                                                                                                                                                                                                                                                                                                                                                         |                                               |
| S14 | ((non-pharma* or nonpharma* or non pharma* or non-drug or nondrug or non drug or non-surgical or nonsurgical or non surgical or non-surgery or nonsurgery or non surgery or non-invasive or noninvasive or non invasive or complimentary or integrat* or holistic or multi-modal* or multimodal* or Multidisciplinary or Multi-disciplinary or Interdisciplinary or Inter-disciplinary or complex or multimodal* or multi-modal* or cross-disciplinary or crossdisciplinary or multi-dimensional or multidimensional or biopsychosocial or bio-psycho-social or multi-facet* or multifacet* or comprehensive or multiple or physiotherapy or physical therap*) N3 (therap* or treat* or intervention* |                                               |

|     |                                                                                                                                                                                                                                                                                                                                                                                                                                                                                                                                                |  |
|-----|------------------------------------------------------------------------------------------------------------------------------------------------------------------------------------------------------------------------------------------------------------------------------------------------------------------------------------------------------------------------------------------------------------------------------------------------------------------------------------------------------------------------------------------------|--|
|     | or action* or program* or strateg* or protocol* or support* or approach* or evaluation or rehabilitation or care or session*))                                                                                                                                                                                                                                                                                                                                                                                                                 |  |
| S13 | neurorehabilitati* or neuro-rehabilitati*                                                                                                                                                                                                                                                                                                                                                                                                                                                                                                      |  |
| S12 | (mckenzie or mechanical or Alexander or William or Feldenkrais) N2 (technique* or model* or tool* or exercise* or therapy)                                                                                                                                                                                                                                                                                                                                                                                                                     |  |
| S11 | (yoga or tai ji or tai chi or qigong or qi-gong or pilates*)                                                                                                                                                                                                                                                                                                                                                                                                                                                                                   |  |
| S10 | running or Skate* or skating or skiing or Jog* or zumba or kettlebelt or Swim* or Bicycl* or cycling or bicycling or fitness bike* or exercise bike* or spinning or walk* or rowing or rower or water-rower* or waterrower* or cross-train* or crosstrain* or pacing or paced or titreted or (weight* N3 (lift* or train* or exercis*))                                                                                                                                                                                                        |  |
| S9  | (active rehabilitation or aerobic* or anaerobic* or movement therapy or watergym* or water gym* or aquagym or gym* or hydrotherap* or pilates)                                                                                                                                                                                                                                                                                                                                                                                                 |  |
| S8  | (muscl* or resistance or physical or endurance or strength* or balance or postur* or gait or threshold* or treadmill* or aquatic* or trunk or graded or gradual or progressive or controlled or incremented or symptom-based or symptombased or symptom based or guided or supervis* or coached or coaching or stepped care or stepwise or step-wise) N3 (train* or retrain* or re-train* or exercise* or rehabilitation or strength* or fit* or condition* or exposure or activit* or exertion or load* or physical therap* or physiotherap*) |  |
| S7  | (physical N1 (education or program*)) or (exercise N3 (session* or training or technique* or physical or isometric or therap* or program* or class*))                                                                                                                                                                                                                                                                                                                                                                                          |  |
| S6  | TI (exercis* or train* or stepped care or physical therap* or physiotherap* or kinesiotherapy)                                                                                                                                                                                                                                                                                                                                                                                                                                                 |  |
| S5  | MH "Physical therapy" or MH "Exercise+" or MH "Exercise therapy+" or MH Sports+ or MH "Physical Exertion+" or MH "Muscle strength+" or MH "Exercise Movement Techniques+" or MH "physical therapy modalities+ or MH "Physical Education and Training+" or MH "Weight-Bearing" or MH "Ta ji+" OR MH "Yoga+"                                                                                                                                                                                                                                     |  |
| S4  | S1 OR S2 OR S3                                                                                                                                                                                                                                                                                                                                                                                                                                                                                                                                 |  |
| S3  | SU (headache* or head ache* or head pain or cephalalgia* or cephalgia* or migraine* or Cephalodynia* or cranial pain or hemicranias* or cerebral pain or cranialgia*)                                                                                                                                                                                                                                                                                                                                                                          |  |

|    |                                                                                                                                                                    |  |
|----|--------------------------------------------------------------------------------------------------------------------------------------------------------------------|--|
| S2 | (headache* or head ache* or head pain or cephalalgia* or cephalgia* or migraine* or Cephalodynia* or cranial pain or hemicranias* or cerebral pain or cranialgia*) |  |
| S1 | MH "Headache" or MH "Headache, Primary" or MH "Migraine" or MH "Tension headache"                                                                                  |  |

---

**PEDRO**

Abstract & Title: headache or migraine\*

Method: Practice guideline or Systematic review

---

**Should patients with tension-type headache be offered psychological treatment?  
Should patients with tension-type headache be offered patient education besides usual treatment?**

**Combined search**

Search date: 20.05.2020

**Medline**

Database(s): **Ovid MEDLINE(R) and Epub Ahead of Print, In-Process & Other Non-Indexed Citations, Daily and Versions(R)** 1946 to May 19, 2020

Search Strategy:

| #  | Searches                                                                                                                                                                                                                                                                                                                                                                                                                                                                                                                                                                                                                                                                                                                                                                                                                                                                                                                                |
|----|-----------------------------------------------------------------------------------------------------------------------------------------------------------------------------------------------------------------------------------------------------------------------------------------------------------------------------------------------------------------------------------------------------------------------------------------------------------------------------------------------------------------------------------------------------------------------------------------------------------------------------------------------------------------------------------------------------------------------------------------------------------------------------------------------------------------------------------------------------------------------------------------------------------------------------------------|
| 1  | Headache/                                                                                                                                                                                                                                                                                                                                                                                                                                                                                                                                                                                                                                                                                                                                                                                                                                                                                                                               |
| 2  | Headache disorders/                                                                                                                                                                                                                                                                                                                                                                                                                                                                                                                                                                                                                                                                                                                                                                                                                                                                                                                     |
| 3  | Headache Disorders, Primary/                                                                                                                                                                                                                                                                                                                                                                                                                                                                                                                                                                                                                                                                                                                                                                                                                                                                                                            |
| 4  | exp Migraine Disorders/                                                                                                                                                                                                                                                                                                                                                                                                                                                                                                                                                                                                                                                                                                                                                                                                                                                                                                                 |
| 5  | exp Tension-Type Headache/                                                                                                                                                                                                                                                                                                                                                                                                                                                                                                                                                                                                                                                                                                                                                                                                                                                                                                              |
| 6  | (headache* or head ache* or head pain or cephalalgia* or cephalgia* or migraine* or Cephalodynia* or cranial pain or hemicranias* or cerebral pain or cranialgia*).ti,bt,ab,kw,kf.                                                                                                                                                                                                                                                                                                                                                                                                                                                                                                                                                                                                                                                                                                                                                      |
| 7  | or/1-6                                                                                                                                                                                                                                                                                                                                                                                                                                                                                                                                                                                                                                                                                                                                                                                                                                                                                                                                  |
| 8  | Health education/                                                                                                                                                                                                                                                                                                                                                                                                                                                                                                                                                                                                                                                                                                                                                                                                                                                                                                                       |
| 9  | exp Patient Education as Topic/                                                                                                                                                                                                                                                                                                                                                                                                                                                                                                                                                                                                                                                                                                                                                                                                                                                                                                         |
| 10 | exp Programmed Instruction as Topic/                                                                                                                                                                                                                                                                                                                                                                                                                                                                                                                                                                                                                                                                                                                                                                                                                                                                                                    |
| 11 | Hotlines/                                                                                                                                                                                                                                                                                                                                                                                                                                                                                                                                                                                                                                                                                                                                                                                                                                                                                                                               |
| 12 | exp Counseling/                                                                                                                                                                                                                                                                                                                                                                                                                                                                                                                                                                                                                                                                                                                                                                                                                                                                                                                         |
| 13 | (psychoeducat* or psycho-educat*).ti,bt,ab,kw,kf.                                                                                                                                                                                                                                                                                                                                                                                                                                                                                                                                                                                                                                                                                                                                                                                                                                                                                       |
| 14 | ((information* or educat* or guid* or counsel?ing or school* or clinic*1 or Course* or Coach* or instruction or class* or advic* or advis* or handout* or hand-out* or pamphlet* or leaflet* or booklet* or brochure* or website) adj3 (health or headache og migraine or treatment* or therapy or intervention or management or patient* or tailor* or individual* or Patient-centred or Patient-centered or Patient-oriented or Patient-focused or Patient-based or Patient-tailored or client-cent* or client cent* or client-focus* or client focus* or Client-oriented or Client-based or Client-tailored or person-centered or person-centred or person centered or person centred or person-focus* or person focus* or Person-oriented or Person-based or Person-tailored or Individual-centred or Individual-centered or Individual-focused or Individual-oriented or Individual-based or Individual-tailored)).ti,bt,ab,kw,kf. |



|    |                                                                                                                                                                                                                                                                                                                                                                                                                                                                                                                                                                                                                                                                                                                                                                                                                                                                                                                                                                                                                                                                                                               |
|----|---------------------------------------------------------------------------------------------------------------------------------------------------------------------------------------------------------------------------------------------------------------------------------------------------------------------------------------------------------------------------------------------------------------------------------------------------------------------------------------------------------------------------------------------------------------------------------------------------------------------------------------------------------------------------------------------------------------------------------------------------------------------------------------------------------------------------------------------------------------------------------------------------------------------------------------------------------------------------------------------------------------------------------------------------------------------------------------------------------------|
| 15 | (self-management or self-instruction* or selfmanagement or selfinstruction* or self management or self instruction* or self-guid* or self guid* or selfguid* or self care or self-care or selfcare or guidance).ti,bt,ab,kw,kf.                                                                                                                                                                                                                                                                                                                                                                                                                                                                                                                                                                                                                                                                                                                                                                                                                                                                               |
| 16 | ((information* or instruction* or educat*) adj3 (material or advic* or advis* or handout* or hand-out* or pamphlet* or leaflet* or booklet* or brochure* or guid* or resource*)).ti,bt,ab,kw,kf.                                                                                                                                                                                                                                                                                                                                                                                                                                                                                                                                                                                                                                                                                                                                                                                                                                                                                                              |
| 17 | ((education* or learn* or training or teach*) adj2 (program* or patient* or consumer* or material* or resource* or aid*)).ti,bt,ab,kw,kf.                                                                                                                                                                                                                                                                                                                                                                                                                                                                                                                                                                                                                                                                                                                                                                                                                                                                                                                                                                     |
| 18 | (patient adj (information or knowledge or website*)).ti,bt,ab,kw,kf.                                                                                                                                                                                                                                                                                                                                                                                                                                                                                                                                                                                                                                                                                                                                                                                                                                                                                                                                                                                                                                          |
| 19 | (workshop* or seminar* or ((discussion or support) adj group*)).ti,bt,ab,kw,kf.                                                                                                                                                                                                                                                                                                                                                                                                                                                                                                                                                                                                                                                                                                                                                                                                                                                                                                                                                                                                                               |
| 20 | (factsheet* or fact sheet* or advice line* or advice-line* or hotline or help line* or help-line* or helpline*).ti,bt,ab,kw,kf.                                                                                                                                                                                                                                                                                                                                                                                                                                                                                                                                                                                                                                                                                                                                                                                                                                                                                                                                                                               |
| 21 | ((tele* or tele-based or tele-support* or telehealth or tele-health or telemedicine or tele-medicine or internet* or internet-based or internetbased or internet-delivered or internet-support* or internet-assisted or web or webbased or web-based or web based or web-support* or web-assisted or WWW or email* or e-mail or telephone or phone or computer* or computer-based or computerbased or computer-support* or computer-assisted or PC or PCs or PC-based or pc-support* or pc-assisted or skype or skype-based or skype-delivered or skype-assisted or apps or app-based or app based or app-assisted or smartphone* or ipad* or tablet* or IOS or android* or online* or on-line or mobile or ehealth or e-health or e-therap* or distance or remote or video-conferenc* or videoconference* or chatroom* or electronic or digital* or technology or technology-based or technology-delivered or technology-supported or technology-assisted or distance) adj3 (counsel* or support* or guide* or guidance or education or school* or course* or coach* or teach* or session*)).ti,bt,ab,kw,kf. |
| 22 | (tele-counsel?ing or tele-education or tele-instruction or tele-session* or tele-class* or tele-course* or tele-guid* or tele-coaching or internet-counsel?ing or internet-education or internet-instruction or internet-session* or internet-class* or internet-course* or internet-coaching or internet-guid* or web-counsel?ing or web-education or web-instruction or web-session* or web-class* or web-course* or web-coaching or web-guid* or e-counsel?ing).ti,bt,ab,kw,kf.                                                                                                                                                                                                                                                                                                                                                                                                                                                                                                                                                                                                                            |
| 23 | exp Psychotherapy/                                                                                                                                                                                                                                                                                                                                                                                                                                                                                                                                                                                                                                                                                                                                                                                                                                                                                                                                                                                                                                                                                            |
| 24 | exp Cognitive Behavioral Therapy/                                                                                                                                                                                                                                                                                                                                                                                                                                                                                                                                                                                                                                                                                                                                                                                                                                                                                                                                                                                                                                                                             |
| 25 | exp Adaptation, Psychological/                                                                                                                                                                                                                                                                                                                                                                                                                                                                                                                                                                                                                                                                                                                                                                                                                                                                                                                                                                                                                                                                                |
| 26 | Motivational Interviewing/                                                                                                                                                                                                                                                                                                                                                                                                                                                                                                                                                                                                                                                                                                                                                                                                                                                                                                                                                                                                                                                                                    |
| 27 | exp Mindfulness/                                                                                                                                                                                                                                                                                                                                                                                                                                                                                                                                                                                                                                                                                                                                                                                                                                                                                                                                                                                                                                                                                              |
| 28 | Breathing Exercises/                                                                                                                                                                                                                                                                                                                                                                                                                                                                                                                                                                                                                                                                                                                                                                                                                                                                                                                                                                                                                                                                                          |
| 29 | exp Biofeedback, Psychology/ or feedback/ or feedback, psychological/ or autogenic training/                                                                                                                                                                                                                                                                                                                                                                                                                                                                                                                                                                                                                                                                                                                                                                                                                                                                                                                                                                                                                  |
| 30 | Relaxation therapy/ or Muscle relaxation/                                                                                                                                                                                                                                                                                                                                                                                                                                                                                                                                                                                                                                                                                                                                                                                                                                                                                                                                                                                                                                                                     |
| 31 | "Imagery (Psychotherapy)"/                                                                                                                                                                                                                                                                                                                                                                                                                                                                                                                                                                                                                                                                                                                                                                                                                                                                                                                                                                                                                                                                                    |

|    |                                                                                                                                                                                                                                                                                                                                                                                                                                                                                                                                                                                                                                                                                                                                                                                                                                                                                                                                                                                    |
|----|------------------------------------------------------------------------------------------------------------------------------------------------------------------------------------------------------------------------------------------------------------------------------------------------------------------------------------------------------------------------------------------------------------------------------------------------------------------------------------------------------------------------------------------------------------------------------------------------------------------------------------------------------------------------------------------------------------------------------------------------------------------------------------------------------------------------------------------------------------------------------------------------------------------------------------------------------------------------------------|
| 32 | (cbt or act or (acceptance adj2 therapy)).ti,bt,ab,kw,kf.                                                                                                                                                                                                                                                                                                                                                                                                                                                                                                                                                                                                                                                                                                                                                                                                                                                                                                                          |
| 33 | (cognitive-behavior-therapy or cognitive-behavioral-therapy).ti,bt,ab,kw,kf.                                                                                                                                                                                                                                                                                                                                                                                                                                                                                                                                                                                                                                                                                                                                                                                                                                                                                                       |
| 34 | ((cognitive or cognitive-behavior* or behavior or individual or group or Schema* or asserti* or network or communit* or family or carer* or parent* or imagery or marital or spous* or Transference* or cognitive or behavior* or mentali#ation* or visuali#ation or dynamic or crisis or emotion* or psychodynamic* or Interpersonal or Conversational or psychiatric or Aversive or Biofeedback or neurofeedback or Desensiti#ation or Relaxation or Feedback or Gestalt or Hypnosis or Music or Narrative or Psychoanalytic or Psychotherapeutic or Association or Reality or Neurolinguistic Programming or NPL or mindful* or meditation or attention control or stress) adj3 (therap* or treatment* or intervention* or management* or model* or program* or modal* or treat* or interview* or training or rehabilitation or neuro-rehabilitation or neurorehabilitation or support* or counseling or counselling or remediation or session* or technique*)).ti,bt,ab,kw,kf. |
| 35 | (psychotherap* or psycho-therap* or counsel?ing).ti,bt,ab,kw,kf.                                                                                                                                                                                                                                                                                                                                                                                                                                                                                                                                                                                                                                                                                                                                                                                                                                                                                                                   |
| 36 | ((psychologic* or neuro-psycholog* or neuropsycholog* or psychosocial or psycho-social) adj3 (therap* or treat* or intervention* or program* or plan* or approach* or action* or model* or modal* or multimodal* or multi-modal* or interview* or management or training or rehabilitation or neuro-rehabilitation or neurorehabilitation or support* or counseling or counselling or remediation or session* or coaching)).ti,bt,ab,kw,kf.                                                                                                                                                                                                                                                                                                                                                                                                                                                                                                                                        |
| 37 | ((controlled or paced or therap* or exercise*) adj2 breathing).ti,bt,ab,kw,kf.                                                                                                                                                                                                                                                                                                                                                                                                                                                                                                                                                                                                                                                                                                                                                                                                                                                                                                     |
| 38 | (respirat* adj2 (training or exercise* or therap*)).ti,bt,ab,kw,kf.                                                                                                                                                                                                                                                                                                                                                                                                                                                                                                                                                                                                                                                                                                                                                                                                                                                                                                                |
| 39 | (guided adj2 (imagery or visuali*)).ti,bt,ab,kw,kf.                                                                                                                                                                                                                                                                                                                                                                                                                                                                                                                                                                                                                                                                                                                                                                                                                                                                                                                                |
| 40 | (problem solving or coping behavior* or social coping or stress management or stress handling or adaptation or adaptive behavior*).ti,bt,ab,kw,kf.                                                                                                                                                                                                                                                                                                                                                                                                                                                                                                                                                                                                                                                                                                                                                                                                                                 |
| 41 | (empower* or neuro-rehabilitati* or neurorehabilitati*).ti,bt,ab,kw,kf.                                                                                                                                                                                                                                                                                                                                                                                                                                                                                                                                                                                                                                                                                                                                                                                                                                                                                                            |
| 42 | ((non-pharma* or nonpharma* or non pharma* or non-drug or nondrug or non drug or non-surgical or nonsurgical or non surgical or non-surgery or nonsurgery or non surgery or non-invasive or noninvasive or non invasive or complimentary or integrat* or holistic or multi-modal* or multimodal* or Multidisciplinary or Multi-disciplinary or Interdisciplinary or Inter-disciplinary or complex or multimodal* or multi-modal* or cross-disciplinary or crossdisciplinary or multi-dimensional or multidimensional or biopsychosocial or bio-psycho-social or multi-facet* or multifacet* or comprehensive or multiple or addition* or physiotherapy or physical therap*) adj6 (therap* or treat* or intervention* or action* or program* or strateg* or protocol* or support* or approach* or evaluation or rehabilitation or care or session*)).ti,bt,kw,kf.                                                                                                                   |
| 43 | or/8-42                                                                                                                                                                                                                                                                                                                                                                                                                                                                                                                                                                                                                                                                                                                                                                                                                                                                                                                                                                            |
| 44 | 7 and 43                                                                                                                                                                                                                                                                                                                                                                                                                                                                                                                                                                                                                                                                                                                                                                                                                                                                                                                                                                           |
| 45 | limit 44 to (guideline or practice guideline or systematic reviews or meta analysis)                                                                                                                                                                                                                                                                                                                                                                                                                                                                                                                                                                                                                                                                                                                                                                                                                                                                                               |

|    |                                                                                                                                                                                                                                     |
|----|-------------------------------------------------------------------------------------------------------------------------------------------------------------------------------------------------------------------------------------|
| 46 | ((systematic or rapid or integrative or umbrella) adj3 (review* or overview* or study or studies or search* or approach* or analys*)) or guideline* or recommendations or meta analy* or meta-analy* or metaanaly*).ti,bt,ab,kw,kf. |
| 47 | ((pool* or combin*) adj1 (data or analys*)).ti,ab.                                                                                                                                                                                  |
| 48 | (pubmed or medline or embase or cochrane or "web of science" or psycinfo or psychinfo or scopus).ti,ab.                                                                                                                             |
| 49 | cochrane.jw.                                                                                                                                                                                                                        |
| 50 | Network meta-analysis/                                                                                                                                                                                                              |
| 51 | ((multiple or mixed) adj1 (treatment* or therap*) adj1 comparison*) or (indirect adj1 comparison*).ti,bt,ab,kw,kf.                                                                                                                  |
| 52 | or/46-51                                                                                                                                                                                                                            |
| 53 | 44 and 52                                                                                                                                                                                                                           |
| 54 | 45 or 53                                                                                                                                                                                                                            |

## Embase

Database(s): **Embase** 1974 to 2020 May 19

Search Strategy:

| #  | Searches                                                                                                                                                                                                              |
|----|-----------------------------------------------------------------------------------------------------------------------------------------------------------------------------------------------------------------------|
| 1  | Headache/                                                                                                                                                                                                             |
| 2  | "headache and facial pain"/                                                                                                                                                                                           |
| 3  | exp migraine/                                                                                                                                                                                                         |
| 4  | exp tension headache/                                                                                                                                                                                                 |
| 5  | exp chronic daily headache/                                                                                                                                                                                           |
| 6  | primary headache/                                                                                                                                                                                                     |
| 7  | stabbing headache/                                                                                                                                                                                                    |
| 8  | (headache* or head ache* or head pain or cephalalgia* or cephalgia* or migraine* or Cephalodynia* or cranial pain or hemicranias* or cerebral pain or cranialgia* or trigeminal-autonomic-<br>cephalalgia*).ti,ab,kw. |
| 9  | or/1-8                                                                                                                                                                                                                |
| 10 | Health education/                                                                                                                                                                                                     |
| 11 | exp Patient Education/                                                                                                                                                                                                |
| 12 | exp Psychoeducation/                                                                                                                                                                                                  |
| 13 | teaching/                                                                                                                                                                                                             |

|    |                                                                                                                                                                                                                                                                                                                                                                                                                                                                                                                                                                                                                                                                                                                                                                                                                                                                                                                                                                                                                                                                                                          |
|----|----------------------------------------------------------------------------------------------------------------------------------------------------------------------------------------------------------------------------------------------------------------------------------------------------------------------------------------------------------------------------------------------------------------------------------------------------------------------------------------------------------------------------------------------------------------------------------------------------------------------------------------------------------------------------------------------------------------------------------------------------------------------------------------------------------------------------------------------------------------------------------------------------------------------------------------------------------------------------------------------------------------------------------------------------------------------------------------------------------|
| 14 | hotline/                                                                                                                                                                                                                                                                                                                                                                                                                                                                                                                                                                                                                                                                                                                                                                                                                                                                                                                                                                                                                                                                                                 |
| 15 | counseling/ or anticipatory guidance/ or directive counseling/ or e-counseling/ or motivational interviewing/ or patient counseling/ or patient guidance/                                                                                                                                                                                                                                                                                                                                                                                                                                                                                                                                                                                                                                                                                                                                                                                                                                                                                                                                                |
| 16 | (psychoeducat* or psycho-educat*).ti,ab,kw.                                                                                                                                                                                                                                                                                                                                                                                                                                                                                                                                                                                                                                                                                                                                                                                                                                                                                                                                                                                                                                                              |
| 17 | ((information* or educat* or guid* or counsel?ing or school* or clinic*1 or Course* or Coach* or instruction or class* or advic* or advis* or handout* or hand-out* or pamphlet* or leaflet* or booklet* or brochure* or website) adj3 (health or headache og migraine or treatment* or therapy or intervention or management or patient* or tailor* or individual* or Patient-centred or Patient-centered or Patient-oriented or Patient-focused or Patient-based or Patient-tailored or client-cent* or client cent* or client-focus* or client focus* or Client-oriented or Client-based or Client-tailored or person-centered or person-centred or person centered or person centred or person-focus* or person focus* or Person-oriented or Person-based or Person-tailored or Individual-centred or Individual-centered or Individual-focused or Individual-oriented or Individual-based or Individual-tailored)).ti,ab,kw.                                                                                                                                                                        |
| 18 | (self-management or self-instruction* or selfmanagement or selfinstruction* or self management or self instruction* or self-guid* or self guid* or selfguid* or self care or self-care or selfcare or guidance).ti,ab,kw.                                                                                                                                                                                                                                                                                                                                                                                                                                                                                                                                                                                                                                                                                                                                                                                                                                                                                |
| 19 | ((information* or instruction* or educat*) adj3 (material or advic* or advis* or handout* or hand-out* or pamphlet* or leaflet* or booklet* or brochure* or guid* or resource* or e-book*)).ti,ab,kw.                                                                                                                                                                                                                                                                                                                                                                                                                                                                                                                                                                                                                                                                                                                                                                                                                                                                                                    |
| 20 | ((education* or learn* or training or teach*) adj2 (program* or patient* or consumer* or material* or resource* or aid*)).ti,ab,kw.                                                                                                                                                                                                                                                                                                                                                                                                                                                                                                                                                                                                                                                                                                                                                                                                                                                                                                                                                                      |
| 21 | (patient adj (information or knowledge or website*)).ti,ab,kw.                                                                                                                                                                                                                                                                                                                                                                                                                                                                                                                                                                                                                                                                                                                                                                                                                                                                                                                                                                                                                                           |
| 22 | (workshop* or seminar* or ((discussion or support) adj group*)).ti,ab,kw.                                                                                                                                                                                                                                                                                                                                                                                                                                                                                                                                                                                                                                                                                                                                                                                                                                                                                                                                                                                                                                |
| 23 | (factsheet* or advice line* or advice-line* or hotline or help line* or help-line* or helpline*).ti,ab,kw.                                                                                                                                                                                                                                                                                                                                                                                                                                                                                                                                                                                                                                                                                                                                                                                                                                                                                                                                                                                               |
| 24 | ((tele* or tele-based or tele-support* or telehealth or tele-health or telemedicine or tele-medicine or internet* or internet-based or internetbased or internet-delivered or internet-support* or internet-assisted or web or webbased or web-based or web based or web-support* or web-assisted or WWW or email* or e-mail or telephone or phone or computer* or computer-based or computerbased or computer-support* or computer-assisted or PC or PCs or PC-based or pc-support* or pc-assisted or skype or skype-based or skype-delivered or skype-assisted or app*1 or app-based or app based or app-assisted or smartphone* or ipad* or tablet* or IOS or android* or online* or on-line or mobile or ehealth or e-health or e-therap* or distance or remote or video-conferenc* or videoconference* or chatroom* or electronic or digital* or technology or technology-based or technology-delivered or technology-supported or technology-assisted or distance) adj3 (counsel* or support* or guide* or guidance or education or school* or course* or coach* or teach* or session*)).ti,ab,kw. |
| 25 | (tele-counsel?ing or tele-education or tele-instruction or tele-session* or tele-class* or tele-course* or tele-guid* or tele-coaching or internet-counsel?ing or internet-education or internet-instruction or                                                                                                                                                                                                                                                                                                                                                                                                                                                                                                                                                                                                                                                                                                                                                                                                                                                                                          |

|    |                                                                                                                                                                                                                                                                                                                                                                                                                                                                                                                                                                                                                                                                                                                                                                                                                                                                                                                                                                  |
|----|------------------------------------------------------------------------------------------------------------------------------------------------------------------------------------------------------------------------------------------------------------------------------------------------------------------------------------------------------------------------------------------------------------------------------------------------------------------------------------------------------------------------------------------------------------------------------------------------------------------------------------------------------------------------------------------------------------------------------------------------------------------------------------------------------------------------------------------------------------------------------------------------------------------------------------------------------------------|
|    | internet-session* or internet-class* or internet-course* or internet-coaching or internet-guid* or web-counsel?ing or web-education or web-instruction or web-session* or web-class* or web-course* or web-coaching or web-guid* or e-counsel?ing).ti,ab,kw.                                                                                                                                                                                                                                                                                                                                                                                                                                                                                                                                                                                                                                                                                                     |
| 26 | exp Psychotherapy/                                                                                                                                                                                                                                                                                                                                                                                                                                                                                                                                                                                                                                                                                                                                                                                                                                                                                                                                               |
| 27 | exp Cognitive Behavioral Therapy/                                                                                                                                                                                                                                                                                                                                                                                                                                                                                                                                                                                                                                                                                                                                                                                                                                                                                                                                |
| 28 | psychological aspect/                                                                                                                                                                                                                                                                                                                                                                                                                                                                                                                                                                                                                                                                                                                                                                                                                                                                                                                                            |
| 29 | social adaptation/                                                                                                                                                                                                                                                                                                                                                                                                                                                                                                                                                                                                                                                                                                                                                                                                                                                                                                                                               |
| 30 | exp biofeedback/                                                                                                                                                                                                                                                                                                                                                                                                                                                                                                                                                                                                                                                                                                                                                                                                                                                                                                                                                 |
| 31 | exp relaxation training/                                                                                                                                                                                                                                                                                                                                                                                                                                                                                                                                                                                                                                                                                                                                                                                                                                                                                                                                         |
| 32 | exp mindfulness/                                                                                                                                                                                                                                                                                                                                                                                                                                                                                                                                                                                                                                                                                                                                                                                                                                                                                                                                                 |
| 33 | (cbt or act or (acceptance adj2 therapy)).ti,ab,kw.                                                                                                                                                                                                                                                                                                                                                                                                                                                                                                                                                                                                                                                                                                                                                                                                                                                                                                              |
| 34 | (cognitive-behavior-therapy or cognitive-behavioral-therapy).ti,ab,kw.                                                                                                                                                                                                                                                                                                                                                                                                                                                                                                                                                                                                                                                                                                                                                                                                                                                                                           |
| 35 | ((cognitive or cognitive-behavior* or individual or group or Schema* or asserti* or network or communit* or family or carer* or parent* or imagery or marital or spous* or Transference* or cognitive or behavior* or mentalization* or visualization or dynamic or crisis or emotion* or psychodynamic* or Interpersonal or Conversational or psychiatric or Aversive or Biofeedback or neurofeedback or Desensitization or Relaxation or Feedback or Gestalt or Hypnosis or Music or Narrative or Psychoanalytic or Psychotherapeutic or Association or Reality or Neurolinguistic Programming or NPL or mindful* or meditation or attention control or stress) adj3 (therap* or treatment* or intervention* or management* or model* or program* or modal* or treat* or interview* or training or rehabilitation or neuro-rehabilitation or neurorehabilitation or support* or counseling or counselling or remediation or session* or technique*)).ti,ab,kw. |
| 36 | (psychotherap* or psycho-therap* or counsel?ing).ti,ab,kw.                                                                                                                                                                                                                                                                                                                                                                                                                                                                                                                                                                                                                                                                                                                                                                                                                                                                                                       |
| 37 | ((psychologic* or neuro-psycholog* or neuropsycholog* or psychosocial or psycho-social) adj3 (therap* or treat* or intervention* or program* or plan* or approach* or action* or model* or modal* or multimodal* or multi-modal* or interview* or management or training or rehabilitation or neuro-rehabilitation or neurorehabilitation or support* or counseling or counselling or remediation or session* or coaching)).ti,ab,kw.                                                                                                                                                                                                                                                                                                                                                                                                                                                                                                                            |
| 38 | ((controlled or paced or therap* or exercise*) adj2 breathing).ti,ab,kw.                                                                                                                                                                                                                                                                                                                                                                                                                                                                                                                                                                                                                                                                                                                                                                                                                                                                                         |
| 39 | (respirat* adj2 (training or exercise* or therap*)).ti,ab,kw.                                                                                                                                                                                                                                                                                                                                                                                                                                                                                                                                                                                                                                                                                                                                                                                                                                                                                                    |
| 40 | (guided adj2 (imagery or visuali*)).ti,ab,kw.                                                                                                                                                                                                                                                                                                                                                                                                                                                                                                                                                                                                                                                                                                                                                                                                                                                                                                                    |
| 41 | (problem solving or coping behavior* or social coping or stress management or stress handling or adaptation or adaptive behavior*).ti,ab,kw.                                                                                                                                                                                                                                                                                                                                                                                                                                                                                                                                                                                                                                                                                                                                                                                                                     |
| 42 | (empower* or neuro-rehabilitati* or neurorehabilitati*).ti,ab,kw.                                                                                                                                                                                                                                                                                                                                                                                                                                                                                                                                                                                                                                                                                                                                                                                                                                                                                                |
| 43 | ((non-pharma* or nonpharma* or non pharma* or non-drug or nondrug or non drug or non-surgical or nonsurgical or non surgical or non-surgery or nonsurgery or non surgery or non-invasive or                                                                                                                                                                                                                                                                                                                                                                                                                                                                                                                                                                                                                                                                                                                                                                      |

|    |                                                                                                                                                                                                                                                                                                                                                                                                                                                                                                                                                                                                                                                                |
|----|----------------------------------------------------------------------------------------------------------------------------------------------------------------------------------------------------------------------------------------------------------------------------------------------------------------------------------------------------------------------------------------------------------------------------------------------------------------------------------------------------------------------------------------------------------------------------------------------------------------------------------------------------------------|
|    | noninvasive or non invasive or complimentary or integrat* or holistic or multi-modal* or multimodal* or Multidisciplinary or Multi-disciplinary or Interdisciplinary or Inter-disciplinary or complex or multimodal* or multi-modal* or cross-disciplinary or crossdisciplinary or multi-dimensional or multidimensional or biopsychosocial or bio-psycho-social or multi-facet* or multifacet* or comprehensive or multiple or addition* or physiotherapy or physical therap*) adj6 (therap* or treat* or intervention* or action* or program* or strateg* or protocol* or support* or approach* or evaluation or rehabilitation or care or session*)).ti,kw. |
| 44 | or/10-43                                                                                                                                                                                                                                                                                                                                                                                                                                                                                                                                                                                                                                                       |
| 45 | 9 and 44                                                                                                                                                                                                                                                                                                                                                                                                                                                                                                                                                                                                                                                       |
| 46 | limit 45 to ("systematic review" or meta analysis)                                                                                                                                                                                                                                                                                                                                                                                                                                                                                                                                                                                                             |
| 47 | ((systematic or rapid or integrative or umbrella) adj3 (review* or overview* or study or studies or search* or approach* or analys*)) or guideline* or recommendations or meta analy* or meta-analy* or metaanaly*).ti,ab,kw.                                                                                                                                                                                                                                                                                                                                                                                                                                  |
| 48 | ((pool* or combin*) adj1 (data or analys*)).ti,ab.                                                                                                                                                                                                                                                                                                                                                                                                                                                                                                                                                                                                             |
| 49 | (pubmed or medline or embase or cochrane or "web of science" or psycinfo or psychinfo or scopus).ti,ab.                                                                                                                                                                                                                                                                                                                                                                                                                                                                                                                                                        |
| 50 | cochrane.jx.                                                                                                                                                                                                                                                                                                                                                                                                                                                                                                                                                                                                                                                   |
| 51 | Network meta-analysis/                                                                                                                                                                                                                                                                                                                                                                                                                                                                                                                                                                                                                                         |
| 52 | ((multiple or mixed) adj1 (treatment* or therap*) adj1 comparison*) or (indirect adj1 comparison*).ti,ab,kw.                                                                                                                                                                                                                                                                                                                                                                                                                                                                                                                                                   |
| 53 | or/47-52                                                                                                                                                                                                                                                                                                                                                                                                                                                                                                                                                                                                                                                       |
| 54 | 45 and 53                                                                                                                                                                                                                                                                                                                                                                                                                                                                                                                                                                                                                                                      |
| 55 | 46 or 54                                                                                                                                                                                                                                                                                                                                                                                                                                                                                                                                                                                                                                                       |

## PsycINFO

Database(s): **APA PsycInfo** 1806 to May Week 3 2020

Search Strategy:

| # | Searches                                                                                                                                                                     |
|---|------------------------------------------------------------------------------------------------------------------------------------------------------------------------------|
| 1 | exp Headache/                                                                                                                                                                |
| 2 | (headache* or head ache* or head pain or cephalalgia* or cephalgia* or migraine* or Cephalodynia* or cranial pain or hemicranias* or cerebral pain or cranialgia*).ti,ab,id. |
| 3 | or/1-2                                                                                                                                                                       |
| 4 | Health education/                                                                                                                                                            |
| 5 | exp Client Education/                                                                                                                                                        |

|    |                                                                                                                                                                                                                                                                                                                                                                                                                                                                                                                                                                                                                                                                                                                                                                                                                                                                                                                       |
|----|-----------------------------------------------------------------------------------------------------------------------------------------------------------------------------------------------------------------------------------------------------------------------------------------------------------------------------------------------------------------------------------------------------------------------------------------------------------------------------------------------------------------------------------------------------------------------------------------------------------------------------------------------------------------------------------------------------------------------------------------------------------------------------------------------------------------------------------------------------------------------------------------------------------------------|
| 6  | exp Psychoeducation/                                                                                                                                                                                                                                                                                                                                                                                                                                                                                                                                                                                                                                                                                                                                                                                                                                                                                                  |
| 7  | Programmed Instruction/                                                                                                                                                                                                                                                                                                                                                                                                                                                                                                                                                                                                                                                                                                                                                                                                                                                                                               |
| 8  | Computer Assisted Instruction/                                                                                                                                                                                                                                                                                                                                                                                                                                                                                                                                                                                                                                                                                                                                                                                                                                                                                        |
| 9  | Individualized Instruction/                                                                                                                                                                                                                                                                                                                                                                                                                                                                                                                                                                                                                                                                                                                                                                                                                                                                                           |
| 10 | Distance Education/                                                                                                                                                                                                                                                                                                                                                                                                                                                                                                                                                                                                                                                                                                                                                                                                                                                                                                   |
| 11 | exp Educational Programs/                                                                                                                                                                                                                                                                                                                                                                                                                                                                                                                                                                                                                                                                                                                                                                                                                                                                                             |
| 12 | Hot Line Services/                                                                                                                                                                                                                                                                                                                                                                                                                                                                                                                                                                                                                                                                                                                                                                                                                                                                                                    |
| 13 | exp Counseling/                                                                                                                                                                                                                                                                                                                                                                                                                                                                                                                                                                                                                                                                                                                                                                                                                                                                                                       |
| 14 | exp Self-Help Techniques/                                                                                                                                                                                                                                                                                                                                                                                                                                                                                                                                                                                                                                                                                                                                                                                                                                                                                             |
| 15 | (psychoeducat* or psycho-educat*).ti,ab,id.                                                                                                                                                                                                                                                                                                                                                                                                                                                                                                                                                                                                                                                                                                                                                                                                                                                                           |
| 16 | ((information* or educat* or guid* or counsel?ing or school* or Course* or Coach* or instruction or class* or advic* or advis* or handout* or hand-out* or pamphlet* or leaflet* or booklet* or brochure* or website) adj3 (health or headache og migraine or treatment* or therapy or intervention or management or patient* or tailor* or individual* or Patient-centred or Patient-centered or Patient-oriented or Patient-focused or Patient-based or Patient-tailored or client-cent* or client cent* or client-focus* or client focus* or Client-oriented or Client-based or Client-tailored or person-centered or person-centred or person centered or person centred or person-focus* or person focus* or Person-oriented or Person-based or Person-tailored or Individual-centred or Individual-centered or Individual-focused or Individual-oriented or Individual-based or Individual-tailored)).ti,ab,id. |
| 17 | (self-management or self-instruction* or selfmanagement or selfinstruction* or self management or self instruction* or self-guid* or self guid* or selfguid* or self care or self-care or selfcare or guidance).ti,ab,id.                                                                                                                                                                                                                                                                                                                                                                                                                                                                                                                                                                                                                                                                                             |
| 18 | ((information* or instruction* or educat*) adj3 (material or advic* or advis* or handout* or hand-out* or pamphlet* or leaflet* or booklet* or brochure* or guid* or resource*)).ti,ab,id.                                                                                                                                                                                                                                                                                                                                                                                                                                                                                                                                                                                                                                                                                                                            |
| 19 | ((education* or learn* or training or teach*) adj2 (program* or patient* or consumer* or material* or resource* or aid*)).ti,ab,id.                                                                                                                                                                                                                                                                                                                                                                                                                                                                                                                                                                                                                                                                                                                                                                                   |
| 20 | (patient adj (information or knowledge or website*)).ti,ab,id.                                                                                                                                                                                                                                                                                                                                                                                                                                                                                                                                                                                                                                                                                                                                                                                                                                                        |
| 21 | (workshop* or seminar* or ((discussion or support) adj group*)).ti,ab,id.                                                                                                                                                                                                                                                                                                                                                                                                                                                                                                                                                                                                                                                                                                                                                                                                                                             |
| 22 | (factsheet* or advice line* or advice-line* or hotline or help line* or help-line* or helpline*).ti,ab,id.                                                                                                                                                                                                                                                                                                                                                                                                                                                                                                                                                                                                                                                                                                                                                                                                            |
| 23 | ((tele* or tele-based or tele-support* or telehealth or tele-health or telemedicine or tele-medicine or internet* or internet-based or internetbased or internet-delivered or internet-support* or internet-assisted or web or webbased or web-based or web based or web-support* or web-assisted or WWW or email* or e-mail or telephone or phone or computer* or computer-based or computerbased or computer-support* or computer-assisted or PC or PCs or PC-based or pc-support* or pc-assisted or skype or skype-based or skype-delivered or skype-assisted or app*1 or app-based or app based or app-assisted or smartphone* or ipad* or tablet* or IOS or android* or online* or on-line or mobile or                                                                                                                                                                                                          |

|    |                                                                                                                                                                                                                                                                                                                                                                                                                                                                                                                                                                                                  |
|----|--------------------------------------------------------------------------------------------------------------------------------------------------------------------------------------------------------------------------------------------------------------------------------------------------------------------------------------------------------------------------------------------------------------------------------------------------------------------------------------------------------------------------------------------------------------------------------------------------|
|    | ehealth or e-health or e-therap* or distance or remote or video-conferenc* or videoconference* or chatroom* or electronic or digital* or technology or technology-based or technology-delivered or technology-supported or technology-assisted or distance) adj3 (counsel* or support* or guide* or guidance or education or school* or course* or coach* or teach* or session*).ti,ab,id.                                                                                                                                                                                                       |
| 24 | (tele-counsel?ing or tele-education or tele-instruction or tele-session* or tele-class* or tele-course* or tele-guid* or tele-coaching or internet-counsel?ing or internet-education or internet-instruction or internet-session* or internet-class* or internet-course* or internet-coaching or internet-guid* or web-counsel?ing or web-education or web-instruction or web-session* or web-class* or web-course* or web-coaching or web-guid* or e-counsel?ing).ti,ab,id.                                                                                                                     |
| 25 | exp Psychotherapy/                                                                                                                                                                                                                                                                                                                                                                                                                                                                                                                                                                               |
| 26 | exp cognitive therapy/                                                                                                                                                                                                                                                                                                                                                                                                                                                                                                                                                                           |
| 27 | exp Cognitive Techniques/                                                                                                                                                                                                                                                                                                                                                                                                                                                                                                                                                                        |
| 28 | Therapeutic Camps/                                                                                                                                                                                                                                                                                                                                                                                                                                                                                                                                                                               |
| 29 | Psychological stress/                                                                                                                                                                                                                                                                                                                                                                                                                                                                                                                                                                            |
| 30 | Anxiety Management/                                                                                                                                                                                                                                                                                                                                                                                                                                                                                                                                                                              |
| 31 | exp Behavior Modification/                                                                                                                                                                                                                                                                                                                                                                                                                                                                                                                                                                       |
| 32 | "Stress and Coping Measures"/                                                                                                                                                                                                                                                                                                                                                                                                                                                                                                                                                                    |
| 33 | Problem Solving/ or Group Problem solving/                                                                                                                                                                                                                                                                                                                                                                                                                                                                                                                                                       |
| 34 | psychosocial rehabilitation/                                                                                                                                                                                                                                                                                                                                                                                                                                                                                                                                                                     |
| 35 | Biopsychosocial Approach/                                                                                                                                                                                                                                                                                                                                                                                                                                                                                                                                                                        |
| 36 | Motivational Interviewing/                                                                                                                                                                                                                                                                                                                                                                                                                                                                                                                                                                       |
| 37 | exp Reinforcement/                                                                                                                                                                                                                                                                                                                                                                                                                                                                                                                                                                               |
| 38 | exp Mindfulness/ or mindfulness-based interventions/                                                                                                                                                                                                                                                                                                                                                                                                                                                                                                                                             |
| 39 | exp Meditation/                                                                                                                                                                                                                                                                                                                                                                                                                                                                                                                                                                                  |
| 40 | exp Biofeedback/ or feedback/                                                                                                                                                                                                                                                                                                                                                                                                                                                                                                                                                                    |
| 41 | Relaxation therapy/ or Muscle relaxation/                                                                                                                                                                                                                                                                                                                                                                                                                                                                                                                                                        |
| 42 | exp Imagery/                                                                                                                                                                                                                                                                                                                                                                                                                                                                                                                                                                                     |
| 43 | Interdisciplinary Treatment Approach/ or Multimodal Treatment Approach/                                                                                                                                                                                                                                                                                                                                                                                                                                                                                                                          |
| 44 | (cbt or act or (acceptance adj2 therapy)).ti,ab,id.                                                                                                                                                                                                                                                                                                                                                                                                                                                                                                                                              |
| 45 | (cognitive-behavior-therapy or cognitive-behavioral-therapy).ti,ab,id.                                                                                                                                                                                                                                                                                                                                                                                                                                                                                                                           |
| 46 | ((cognitive or cognitive-behavior* or behavior or individual or group or Schema* or asserti* or network or communit* or family or carer* or parent* or imagery or marital or spous* or Transference* or cognitive or behavior* or mentali#ation* or visuali#ation or dynamic or cris#s or emotion* or psychodynamic* or Interpersonal or Conversational or psychiatric or Aversive or Biofeedback or neurofeedback or Desensiti#ation or Relaxation or Feedback or Gestalt or Hypnosis or Music or Narrative or Psychoanalytic or Psychotherapeutic or Association or Reality or Neurolinguistic |



|    |                                                                                                                                                                                                                                                                                                                                                                                                                                                                                                                                                                                                                                                                                                                                                                                                         |
|----|---------------------------------------------------------------------------------------------------------------------------------------------------------------------------------------------------------------------------------------------------------------------------------------------------------------------------------------------------------------------------------------------------------------------------------------------------------------------------------------------------------------------------------------------------------------------------------------------------------------------------------------------------------------------------------------------------------------------------------------------------------------------------------------------------------|
|    | Programming or NPL or mindful* or meditation or attention control or stress) adj3 (therap* or treatment* or intervention* or management* or model* or program* or modal* or treat* or interview* or training or rehabilitation or neuro-rehabilitation or neurorehabilitation or support* or counseling or counselling or remediation or session* or technique*).ti,ab,id.                                                                                                                                                                                                                                                                                                                                                                                                                              |
| 47 | (psychotherap* or psycho-therap* or counsel?ing).ti,ab,id.                                                                                                                                                                                                                                                                                                                                                                                                                                                                                                                                                                                                                                                                                                                                              |
| 48 | ((psychologic* or neuro-psycholog* or neuropsycholog* or psychosocial or psycho-social) adj3 (therap* or treat* or intervention* or program* or plan* or approach* or action* or model* or modal* or multimodal* or multi-modal* or interview* or management or training or rehabilitation or neuro-rehabilitation or neurorehabilitation or support* or counseling or counselling or remediation or session* or coaching)).ti,ab,id.                                                                                                                                                                                                                                                                                                                                                                   |
| 49 | ((controlled or paced or therap* or exercise*) adj2 breathing).ti,ab,id.                                                                                                                                                                                                                                                                                                                                                                                                                                                                                                                                                                                                                                                                                                                                |
| 50 | (respirat* adj2 (training or exercise* or therap*).ti,ab,id.                                                                                                                                                                                                                                                                                                                                                                                                                                                                                                                                                                                                                                                                                                                                            |
| 51 | ((guided adj2 (imagery or visuali*)) or mindful eating or mindful walking).ti,ab,id.                                                                                                                                                                                                                                                                                                                                                                                                                                                                                                                                                                                                                                                                                                                    |
| 52 | (problem solving or coping behavio?r* or social coping or stress management or stress handling or adaptation or adaptive behavio?r*).ti,ab,id.                                                                                                                                                                                                                                                                                                                                                                                                                                                                                                                                                                                                                                                          |
| 53 | (empower* or neuro-rehabilitati* or neurorehabilitati* or ((lifestyle or life-style or life style) adj1 (modification* or change*))).ti,ab,id.                                                                                                                                                                                                                                                                                                                                                                                                                                                                                                                                                                                                                                                          |
| 54 | ((non-pharma* or nonpharma* or non pharma* or non-drug or nondrug or non drug or non-surgical or nonsurgical or non surgical or non-surgery or nonsurgery or non surgery or non-invasive or noninvasive or non invasive or complimentary or integrat* or holistic or multi-modal* or multimodal* or Multidisciplinary or Multi-disciplinary or Interdisciplinary or Inter-disciplinary or complex or multimodal* or multi-modal* or cross-disciplinary or crossdisciplinary or multi-dimensional or multidimensional or biopsychosocial or bio-psycho-social or multi-facet* or multifacet* or comprehensive or multiple) adj6 (therap* or treat* or intervention* or action* or program* or strateg* or protocol* or support* or approach* or evaluation or rehabilitation or care or session*).ti,id. |
| 55 | or/4-54                                                                                                                                                                                                                                                                                                                                                                                                                                                                                                                                                                                                                                                                                                                                                                                                 |
| 56 | 3 and 55                                                                                                                                                                                                                                                                                                                                                                                                                                                                                                                                                                                                                                                                                                                                                                                                |
| 57 | limit 56 to (systematic reviews or meta analysis)                                                                                                                                                                                                                                                                                                                                                                                                                                                                                                                                                                                                                                                                                                                                                       |
| 58 | ((systematic or rapid or integrative or umbrella) adj3 (review* or overview* or study or studies or search* or approach* or analys*)) or guideline* or recommendations or meta analy* or meta-analy* or metaanaly*).ti,ab,id.                                                                                                                                                                                                                                                                                                                                                                                                                                                                                                                                                                           |
| 59 | ((pool* or combin*) adj1 (data or analys*).ti,ab.                                                                                                                                                                                                                                                                                                                                                                                                                                                                                                                                                                                                                                                                                                                                                       |
| 60 | or/58-59                                                                                                                                                                                                                                                                                                                                                                                                                                                                                                                                                                                                                                                                                                                                                                                                |
| 61 | 56 and 60                                                                                                                                                                                                                                                                                                                                                                                                                                                                                                                                                                                                                                                                                                                                                                                               |
| 62 | 57 or 61                                                                                                                                                                                                                                                                                                                                                                                                                                                                                                                                                                                                                                                                                                                                                                                                |

## Cinahl

| #   | Query                                                                                                                                                                                                                                                                                                                                                                                                                                                                                                                                                                                                                                                                                                                                                                                                                                | Limiters/Expanders                            |
|-----|--------------------------------------------------------------------------------------------------------------------------------------------------------------------------------------------------------------------------------------------------------------------------------------------------------------------------------------------------------------------------------------------------------------------------------------------------------------------------------------------------------------------------------------------------------------------------------------------------------------------------------------------------------------------------------------------------------------------------------------------------------------------------------------------------------------------------------------|-----------------------------------------------|
| S46 | S40 AND S45                                                                                                                                                                                                                                                                                                                                                                                                                                                                                                                                                                                                                                                                                                                                                                                                                          | Language: Danish, English, Norwegian, Swedish |
| S45 | S41 OR S42 OR S43 OR S44                                                                                                                                                                                                                                                                                                                                                                                                                                                                                                                                                                                                                                                                                                                                                                                                             |                                               |
| S44 | (((multiple or mixed) adj1 (treatment* or therap*) N1 comparison*) or (indirect N1 comparison*))                                                                                                                                                                                                                                                                                                                                                                                                                                                                                                                                                                                                                                                                                                                                     |                                               |
| S43 | (pool* N1 (data or analys*))                                                                                                                                                                                                                                                                                                                                                                                                                                                                                                                                                                                                                                                                                                                                                                                                         |                                               |
| S42 | (((systematic or rapid or integrative or umbrella) N3 (review* or overview* or study or studies or search* or approach* or analys*)) or guideline* or recommendations or meta analy* or meta-analy* or metaanaly*)                                                                                                                                                                                                                                                                                                                                                                                                                                                                                                                                                                                                                   |                                               |
| S41 | PT (Systematic Review or Meta Analysis) or MH ("Systematic Review+" or "Meta Analysis+")                                                                                                                                                                                                                                                                                                                                                                                                                                                                                                                                                                                                                                                                                                                                             |                                               |
| S40 | S4 and S39                                                                                                                                                                                                                                                                                                                                                                                                                                                                                                                                                                                                                                                                                                                                                                                                                           |                                               |
| S39 | S5 OR S6 OR S7 OR S8 OR S9 OR S10 OR S11 OR S12 OR S13 OR S14 OR S15 OR S16 OR S17 OR S18 OR S19 OR S20 OR S21 OR S22 OR S23 OR S24 OR S25 OR S26 OR S27 OR S28 OR S29 OR S30 OR S31 OR S32 OR S33 OR S34 OR S35 OR S36 OR S37 OR S38                                                                                                                                                                                                                                                                                                                                                                                                                                                                                                                                                                                                |                                               |
| S38 | ((non-pharma* or nonpharma* or non pharma* or non-drug or nondrug or non drug or non-surgical or nonsurgical or non surgical or non-surgery or nonsurgery or non surgery or non-invasive or noninvasive or non invasive or complimentary or integrat* or holistic or multi-modal* or multimodal* or Multidisciplinary or Multi-disciplinary or Interdisciplinary or Inter-disciplinary or complex or multimodal* or multi-modal* or cross-disciplinary or crossdisciplinary or multi-dimensional or multidimensional or biopsychosocial or bio-psycho-social or multi-facet* or multifacet* or comprehensive or multiple or physiotherapy or physical therap*) N6 (therap* or treat* or intervention* or action* or program* or strateg* or protocol* or support* or approach* or evaluation or rehabilitation or care or session*)) |                                               |
| S37 | (empower* or neuro-rehabilitati* or neurorehabilitati*)                                                                                                                                                                                                                                                                                                                                                                                                                                                                                                                                                                                                                                                                                                                                                                              |                                               |
| S36 | (problem solving or coping behavio#r* or social coping or stress management or stress handling or adaptation or adaptive behavio#r*)                                                                                                                                                                                                                                                                                                                                                                                                                                                                                                                                                                                                                                                                                                 |                                               |
| S35 | (guided N2 (imagery or visuali*))                                                                                                                                                                                                                                                                                                                                                                                                                                                                                                                                                                                                                                                                                                                                                                                                    |                                               |

|     |                                                                                                                                                                                                                                                                                                                                                                                                                                                                                                                                                                                                                                                                                                                                                                                                                                                                                                                                                                  |  |
|-----|------------------------------------------------------------------------------------------------------------------------------------------------------------------------------------------------------------------------------------------------------------------------------------------------------------------------------------------------------------------------------------------------------------------------------------------------------------------------------------------------------------------------------------------------------------------------------------------------------------------------------------------------------------------------------------------------------------------------------------------------------------------------------------------------------------------------------------------------------------------------------------------------------------------------------------------------------------------|--|
| S34 | (respirat* N2 (training or exercise* or therap*))                                                                                                                                                                                                                                                                                                                                                                                                                                                                                                                                                                                                                                                                                                                                                                                                                                                                                                                |  |
| S33 | ((controlled or paced or therap* or exercise*) N2 breathing)                                                                                                                                                                                                                                                                                                                                                                                                                                                                                                                                                                                                                                                                                                                                                                                                                                                                                                     |  |
| S32 | ((psychologic* or neuro-psycholog* or neuropsycholog* or psychosocial or psycho-social) N3 (therap* or treat* or intervention* or program* or plan* or approach* or action* or model* or modal* or multimodal* or multi-modal* or interview* or management or training or rehabilitation or neuro-rehabilitation or neurorehabilitation or support* or counseling or counselling or remediation or session* or coaching))                                                                                                                                                                                                                                                                                                                                                                                                                                                                                                                                        |  |
| S31 | (psychotherap* or psycho-therap* or counsel#ing)                                                                                                                                                                                                                                                                                                                                                                                                                                                                                                                                                                                                                                                                                                                                                                                                                                                                                                                 |  |
| S30 | ((cognitive or cognitive-behavior* or behavior or individual or group or Schema* or asserti* or network or communit* or family or carer* or parent* or imagery or marital or spous* or Transference* or cognitive or behavior* or mentali?ation* or visuali?ation or dynamic or cris?s or emotion* or psychodynamic* or Interpersonal or Conversational or psychiatric or Aversive or Biofeedback or neurofeedback or Desensiti?ation or Relaxation or Feedback or Gestalt or Hypnosis or Music or Narrative or Psychoanalytic or Psychotherapeutic or Association or Reality or Neurolinguistic Programming or NPL or mindful* or meditation or attention control or stress) N3 (therap* or treatment* or intervention* or management* or model* or program* or modal* or treat* or interview* or training or rehabilitation or neuro-rehabilitation or neurorehabilitation or support* or counseling or counselling or remediation or session* or technique*)) |  |
| S29 | (cognitive-behavior-therapy or cognitive-behavioral-therapy)                                                                                                                                                                                                                                                                                                                                                                                                                                                                                                                                                                                                                                                                                                                                                                                                                                                                                                     |  |
| S28 | (cbt or act or (acceptance adj2 therapy))                                                                                                                                                                                                                                                                                                                                                                                                                                                                                                                                                                                                                                                                                                                                                                                                                                                                                                                        |  |
| S27 | (MH "Guided Imagery")                                                                                                                                                                                                                                                                                                                                                                                                                                                                                                                                                                                                                                                                                                                                                                                                                                                                                                                                            |  |
| S26 | (MH "Biofeedback")                                                                                                                                                                                                                                                                                                                                                                                                                                                                                                                                                                                                                                                                                                                                                                                                                                                                                                                                               |  |
| S25 | (MH "Breathing Exercises+")                                                                                                                                                                                                                                                                                                                                                                                                                                                                                                                                                                                                                                                                                                                                                                                                                                                                                                                                      |  |
| S24 | (MH "Adaptation, Psychological+")                                                                                                                                                                                                                                                                                                                                                                                                                                                                                                                                                                                                                                                                                                                                                                                                                                                                                                                                |  |
| S23 | (MH "Cognitive Therapy+")                                                                                                                                                                                                                                                                                                                                                                                                                                                                                                                                                                                                                                                                                                                                                                                                                                                                                                                                        |  |
| S22 | MH Neuropsychology                                                                                                                                                                                                                                                                                                                                                                                                                                                                                                                                                                                                                                                                                                                                                                                                                                                                                                                                               |  |
| S21 | (MH "Support, Psychosocial+") OR (MH "Socioenvironmental Therapy+" or MH "Recreational therapy") or (MH "Rehabilitation, Psychosocial+")                                                                                                                                                                                                                                                                                                                                                                                                                                                                                                                                                                                                                                                                                                                                                                                                                         |  |

|     |                                                                                                                                                                                                                                                                                                                                                                                                                                                                                                                                                                                                                                                                                                                                                                                                                                                                                                                                                                                                                                                                                             |  |
|-----|---------------------------------------------------------------------------------------------------------------------------------------------------------------------------------------------------------------------------------------------------------------------------------------------------------------------------------------------------------------------------------------------------------------------------------------------------------------------------------------------------------------------------------------------------------------------------------------------------------------------------------------------------------------------------------------------------------------------------------------------------------------------------------------------------------------------------------------------------------------------------------------------------------------------------------------------------------------------------------------------------------------------------------------------------------------------------------------------|--|
| S20 | MH (Psychotherapy+ or Mindfulness+ or Counseling+ or "Relaxation Techniques")                                                                                                                                                                                                                                                                                                                                                                                                                                                                                                                                                                                                                                                                                                                                                                                                                                                                                                                                                                                                               |  |
| S19 | (tele-counsel#ing or tele-education or tele-instruction or tele-session* or tele-class* or tele-course* or tele-guid* or tele-coaching or internet-counsel#ing or internet-education or internet-instruction or internet-session* or internet-class* or internet-course* or internet-coaching or internet-guid* or web-counsel#ing or web-education or web-instruction or web-session* or web-class* or web-course* or web-coaching or web-guid* or e-counsel#ing)                                                                                                                                                                                                                                                                                                                                                                                                                                                                                                                                                                                                                          |  |
| S18 | ((tele* or tele-based or tele-support* or telehealth or tele-health or telemedicine or tele-medicine or internet* or internet-based or internetbased or internet-delivered or internet-support* or internet-assisted or web or webbased or web-based or web based or web-support* or web-assisted or WWW or email* or e-mail or telephone or phone or computer* or computer-based or computerbased or computer-support* or computer-assisted or PC or PCs or PC-based or pc-support* or pc-assisted or skype or skype-based or skype-delivered or skype-assisted or apps or app-based or app based or app-assisted or smartphone* or ipad* or tablet* or IOS or android* or online* or on-line or mobile or ehealth or e-health or e-therap* or distance or remote or video-conferenc* or videoconference* or chatroom* or electronic or digital* or technology or technology-based or technology-delivered or technology-supported or technology-assisted or distance) N3 (counsel* or support* or guide* or guidance or education or school* or course* or coach* or teach* or session*)) |  |
| S17 | (factsheet* or fact sheet* or advice line* or advice-line* or hotline or help line* or help-line* or helpline*)                                                                                                                                                                                                                                                                                                                                                                                                                                                                                                                                                                                                                                                                                                                                                                                                                                                                                                                                                                             |  |
| S16 | (workshop* or seminar* or ((discussion or support) N1 group*))                                                                                                                                                                                                                                                                                                                                                                                                                                                                                                                                                                                                                                                                                                                                                                                                                                                                                                                                                                                                                              |  |
| S15 | (patient N1 (information or knowledge or website*))                                                                                                                                                                                                                                                                                                                                                                                                                                                                                                                                                                                                                                                                                                                                                                                                                                                                                                                                                                                                                                         |  |
| S14 | ((education* or learn* or training or teach*) N2 (program* or patient* or consumer* or material* or resource* or aid*))                                                                                                                                                                                                                                                                                                                                                                                                                                                                                                                                                                                                                                                                                                                                                                                                                                                                                                                                                                     |  |
| S13 | ((information* or instruction* or educat*) N3 (material or advic* or advis* or handout* or hand-out* or pamphlet* or leaflet* or booklet* or brochure* or guid* or resource*))                                                                                                                                                                                                                                                                                                                                                                                                                                                                                                                                                                                                                                                                                                                                                                                                                                                                                                              |  |
| S12 | (self-management or self-instruction* or selfmanagement or selfinstruction* or self management or self                                                                                                                                                                                                                                                                                                                                                                                                                                                                                                                                                                                                                                                                                                                                                                                                                                                                                                                                                                                      |  |

|     |                                                                                                                                                                                                                                                                                                                                                                                                                                                                                                                                                                                                                                                                                                                                                                                                                                                                                                                      |  |
|-----|----------------------------------------------------------------------------------------------------------------------------------------------------------------------------------------------------------------------------------------------------------------------------------------------------------------------------------------------------------------------------------------------------------------------------------------------------------------------------------------------------------------------------------------------------------------------------------------------------------------------------------------------------------------------------------------------------------------------------------------------------------------------------------------------------------------------------------------------------------------------------------------------------------------------|--|
|     | instruction* or self-guid* or self guid* or selfguid* or self care or self-care or selfcare or guidance)                                                                                                                                                                                                                                                                                                                                                                                                                                                                                                                                                                                                                                                                                                                                                                                                             |  |
| S11 | ((information* or educat* or guid* or counsel#ing or school* or clinic* or Course* or Coach* or instruction or class* or advic* or advis* or handout* or hand-out* or pamphlet* or leaflet* or booklet* or brochure* or website) N3 (health or headache og migraine or treatment* or therapy or intervention or management or patient* or tailor* or individual* or Patient-centred or Patient-centered or Patient-oriented or Patient-focused or Patient-based or Patient-tailored or client-cent* or client cent* or client-focus* or client focus* or Client-oriented or Client-based or Client-tailored or person-centered or person-centred or person centered or person centred or person-focus* or person focus* or Person-oriented or Person-based or Person-tailored or Individual-centred or Individual-centered or Individual-focused or Individual-oriented or Individual-based or Individual-tailored)) |  |
| S10 | (MH "Psychoeducation")                                                                                                                                                                                                                                                                                                                                                                                                                                                                                                                                                                                                                                                                                                                                                                                                                                                                                               |  |
| S9  | (psychoeducat* or psycho-educat*)                                                                                                                                                                                                                                                                                                                                                                                                                                                                                                                                                                                                                                                                                                                                                                                                                                                                                    |  |
| S8  | (MH "Counseling") OR (MH "Anticipatory Guidance") OR (MH "Motivational Interviewing") OR (MH "Peer Counseling")                                                                                                                                                                                                                                                                                                                                                                                                                                                                                                                                                                                                                                                                                                                                                                                                      |  |
| S7  | (MH "Telephone Information Services")                                                                                                                                                                                                                                                                                                                                                                                                                                                                                                                                                                                                                                                                                                                                                                                                                                                                                |  |
| S6  | (MH "Programmed Instruction+")                                                                                                                                                                                                                                                                                                                                                                                                                                                                                                                                                                                                                                                                                                                                                                                                                                                                                       |  |
| S5  | MH ("Health education" or "Patient Education" or "Patient Discharge Education" or "Psychoeducation")                                                                                                                                                                                                                                                                                                                                                                                                                                                                                                                                                                                                                                                                                                                                                                                                                 |  |
| S4  | S1 OR S2 OR S3                                                                                                                                                                                                                                                                                                                                                                                                                                                                                                                                                                                                                                                                                                                                                                                                                                                                                                       |  |
| S3  | SU (headache* or head ache* or head pain or cephalalgia* or cephalgia* or migraine* or Cephalodynia* or cranial pain or hemicranias* or cerebral pain or cranialgia*)                                                                                                                                                                                                                                                                                                                                                                                                                                                                                                                                                                                                                                                                                                                                                |  |
| S2  | (headache* or head ache* or head pain or cephalalgia* or cephalgia* or migraine* or Cephalodynia* or cranial pain or hemicranias* or cerebral pain or cranialgia*)                                                                                                                                                                                                                                                                                                                                                                                                                                                                                                                                                                                                                                                                                                                                                   |  |
| S1  | MH "Headache" or MH "Headache, Primary" or MH "Migraine" or MH "Tension headache"                                                                                                                                                                                                                                                                                                                                                                                                                                                                                                                                                                                                                                                                                                                                                                                                                                    |  |

**PEDRO**

Abstract & Title: headache or migraine\*

Method: Practice guideline or Systematic review

---

**OT Seeker**

Any Field: headache or migraine\*

Method: Systematic Review

---

## Should patients with tension-type headache be offered acupuncture?

Search date: 19.05.2020

### Medline

Database(s): Ovid MEDLINE(R) and Epub Ahead of Print, In-Process & Other Non-Indexed Citations, Daily and Versions(R) 1946 to May 18, 2020

Search Strategy:

| #  | Searches                                                                                                                                                                                                                                                                                                                                                                                                                                                                                                                                                                                                                                                                                                                                                                                                                                                        |
|----|-----------------------------------------------------------------------------------------------------------------------------------------------------------------------------------------------------------------------------------------------------------------------------------------------------------------------------------------------------------------------------------------------------------------------------------------------------------------------------------------------------------------------------------------------------------------------------------------------------------------------------------------------------------------------------------------------------------------------------------------------------------------------------------------------------------------------------------------------------------------|
| 1  | Headache/                                                                                                                                                                                                                                                                                                                                                                                                                                                                                                                                                                                                                                                                                                                                                                                                                                                       |
| 2  | Headache disorders/                                                                                                                                                                                                                                                                                                                                                                                                                                                                                                                                                                                                                                                                                                                                                                                                                                             |
| 3  | Headache Disorders, Primary/                                                                                                                                                                                                                                                                                                                                                                                                                                                                                                                                                                                                                                                                                                                                                                                                                                    |
| 4  | exp Migraine Disorders/                                                                                                                                                                                                                                                                                                                                                                                                                                                                                                                                                                                                                                                                                                                                                                                                                                         |
| 5  | exp Tension-Type Headache/                                                                                                                                                                                                                                                                                                                                                                                                                                                                                                                                                                                                                                                                                                                                                                                                                                      |
| 6  | (headache* or head ache* or head pain or cephalalgia* or cephalgia* or migraine or Cephalodynia* or cranial pain or hemicranias* or cerebral pain or cranialgia*).ti,bt,ab,kw,kf.                                                                                                                                                                                                                                                                                                                                                                                                                                                                                                                                                                                                                                                                               |
| 7  | or/1-6                                                                                                                                                                                                                                                                                                                                                                                                                                                                                                                                                                                                                                                                                                                                                                                                                                                          |
| 8  | exp Acupuncture therapy/ or exp Acupuncture/                                                                                                                                                                                                                                                                                                                                                                                                                                                                                                                                                                                                                                                                                                                                                                                                                    |
| 9  | (mox#bustion or acupuncture* or acu-puncture* or needle* or needling or electroacupuncture or electro-acupuncture or acupressure).ti,bt,ab,kw,kf.                                                                                                                                                                                                                                                                                                                                                                                                                                                                                                                                                                                                                                                                                                               |
| 10 | ((Trigger adj2 point*) or (auricul adj2 acupuncture) or (warm adj2 acupuncture) or (dry adj (needle* or needling))).ti,bt,ab,kw,kf.                                                                                                                                                                                                                                                                                                                                                                                                                                                                                                                                                                                                                                                                                                                             |
| 11 | (neuro-rehabilitati* or neurorehabilitati*).ti,bt,ab,kw,kf.                                                                                                                                                                                                                                                                                                                                                                                                                                                                                                                                                                                                                                                                                                                                                                                                     |
| 12 | ((non-pharma* or nonpharma* or non pharma* or non-drug or nondrug or non drug or non-surgical or nonsurgical or non surgical or non-surgery or nonsurgery or non surgery or non-invasive or noninvasive or non invasive or complimentary or integrat* or holistic or multi-modal* or multimodal* or Multidisciplinary or Multi-disciplinary or Interdisciplinary or Inter-disciplinary or complex or multimodal* or multi-modal* or cross-disciplinary or crossdisciplinary or multi-dimensional or multidimensional or biopsychosocial or bio-psycho-social or multi-facet* or multifacet* or comprehensive or multiple or addition* or physiotherapy or physical therap*) adj6 (therap* or treat* or intervention* or action* or program* or strateg* or protocol* or support* or approach* or evaluation or rehabilitation or care or session*).ti,bt,kw,kf. |
| 13 | or/8-12                                                                                                                                                                                                                                                                                                                                                                                                                                                                                                                                                                                                                                                                                                                                                                                                                                                         |
| 14 | 7 and 13                                                                                                                                                                                                                                                                                                                                                                                                                                                                                                                                                                                                                                                                                                                                                                                                                                                        |
| 15 | limit 14 to (guideline or practice guideline or systematic reviews or meta analysis)                                                                                                                                                                                                                                                                                                                                                                                                                                                                                                                                                                                                                                                                                                                                                                            |

|    |                                                                                                                                                                                                                                     |
|----|-------------------------------------------------------------------------------------------------------------------------------------------------------------------------------------------------------------------------------------|
| 16 | ((systematic or rapid or integrative or umbrella) adj3 (review* or overview* or study or studies or search* or approach* or analys*)) or guideline* or recommendations or meta analy* or meta-analy* or metaanaly*).ti,bt,ab,kw,kf. |
| 17 | (pool* adj1 (data or analys*)).ti,ab,kw.                                                                                                                                                                                            |
| 18 | (pubmed or medline or embase or cochrane or "web of science" or psycinfo or psychinfo or scopus).ti,ab.                                                                                                                             |
| 19 | cochrane.jw.                                                                                                                                                                                                                        |
| 20 | Network meta-analysis/                                                                                                                                                                                                              |
| 21 | ((multiple or mixed) adj1 (treatment* or therap*) adj1 comparison*) or (indirect adj1 comparison*).ti,bt,ab,kw,kf.                                                                                                                  |
| 22 | or/16-21                                                                                                                                                                                                                            |
| 23 | 14 and 22                                                                                                                                                                                                                           |
| 24 | 15 or 23                                                                                                                                                                                                                            |

## Embase

Database(s): **Embase** 1974 to 2020 May 18

Search Strategy:

| #  | Searches                                                                                                                                                                    |
|----|-----------------------------------------------------------------------------------------------------------------------------------------------------------------------------|
| 1  | Headache/                                                                                                                                                                   |
| 2  | "headache and facial pain"/                                                                                                                                                 |
| 3  | exp migraine/                                                                                                                                                               |
| 4  | exp tension headache/                                                                                                                                                       |
| 5  | exp chronic daily headache/                                                                                                                                                 |
| 6  | stabbing headache/                                                                                                                                                          |
| 7  | primary headache/                                                                                                                                                           |
| 8  | (headache* or head ache* or head pain or cephalalgia* or cephalgia* or migraine or Cephalodynia* or cranial pain or hemicranias* or cerebral pain or cranialgia*).ti,ab,kw. |
| 9  | or/1-8                                                                                                                                                                      |
| 10 | exp Acupuncture/                                                                                                                                                            |
| 11 | (mox#bustion or acupuncture* or acu-puncture* or needle* or needling or electroacupuncture or electro-acupuncture or acupressure).ti,ab,kw.                                 |
| 12 | ((Trigger adj2 point*) or (auricul adj2 acupuncture) or (warm adj2 acupuncture) or (dry adj (needle* or needling))).ti,ab,kw.                                               |
| 13 | (neuro-rehabilitati* or neurorehabilitati*).ti,ab,kw.                                                                                                                       |



|    |                                                                                                                                                                                                                                                                                                                                                                                                                                                                                                                                                                                                                                                                                                                                                                                                                                                            |
|----|------------------------------------------------------------------------------------------------------------------------------------------------------------------------------------------------------------------------------------------------------------------------------------------------------------------------------------------------------------------------------------------------------------------------------------------------------------------------------------------------------------------------------------------------------------------------------------------------------------------------------------------------------------------------------------------------------------------------------------------------------------------------------------------------------------------------------------------------------------|
| 14 | ((non-pharma* or nonpharma* or non pharma* or non-drug or nondrug or non drug or non-surgical or nonsurgical or non surgical or non-surgery or nonsurgery or non surgery or non-invasive or noninvasive or non invasive or complimentary or integrat* or holistic or multi-modal* or multimodal* or Multidisciplinary or Multi-disciplinary or Interdisciplinary or Inter-disciplinary or complex or multimodal* or multi-modal* or cross-disciplinary or crossdisciplinary or multi-dimensional or multidimensional or biopsychosocial or bio-psycho-social or multi-facet* or multifacet* or comprehensive or multiple or addition* or physiotherapy or physical therap*) adj6 (therap* or treat* or intervention* or action* or program* or strateg* or protocol* or support* or approach* or evaluation or rehabilitation or care or session*)).ti,kw. |
| 15 | or/10-14                                                                                                                                                                                                                                                                                                                                                                                                                                                                                                                                                                                                                                                                                                                                                                                                                                                   |
| 16 | 9 and 15                                                                                                                                                                                                                                                                                                                                                                                                                                                                                                                                                                                                                                                                                                                                                                                                                                                   |
| 17 | limit 16 to ("systematic review" or meta analysis)                                                                                                                                                                                                                                                                                                                                                                                                                                                                                                                                                                                                                                                                                                                                                                                                         |
| 18 | ((systematic or rapid or integrative or umbrella) adj3 (review* or overview* or study or studies or search* or approach* or analys*)) or guideline* or recommendations or meta analy* or meta-analy* or metaanaly*).ti,ab,kw.                                                                                                                                                                                                                                                                                                                                                                                                                                                                                                                                                                                                                              |
| 19 | (pool* adj1 (data or analys*)).ti,ab,kw.                                                                                                                                                                                                                                                                                                                                                                                                                                                                                                                                                                                                                                                                                                                                                                                                                   |
| 20 | (pubmed or medline or embase or cochrane or "web of science" or psycinfo or psychinfo or scopus).ti,ab.                                                                                                                                                                                                                                                                                                                                                                                                                                                                                                                                                                                                                                                                                                                                                    |
| 21 | cochrane.jx.                                                                                                                                                                                                                                                                                                                                                                                                                                                                                                                                                                                                                                                                                                                                                                                                                                               |
| 22 | Network meta-analysis/                                                                                                                                                                                                                                                                                                                                                                                                                                                                                                                                                                                                                                                                                                                                                                                                                                     |
| 23 | ((multiple or mixed) adj1 (treatment* or therap*) adj1 comparison*) or (indirect adj1 comparison*).ti,ab,kw.                                                                                                                                                                                                                                                                                                                                                                                                                                                                                                                                                                                                                                                                                                                                               |
| 24 | or/18-23                                                                                                                                                                                                                                                                                                                                                                                                                                                                                                                                                                                                                                                                                                                                                                                                                                                   |
| 25 | 16 and 24                                                                                                                                                                                                                                                                                                                                                                                                                                                                                                                                                                                                                                                                                                                                                                                                                                                  |
| 26 | 17 or 25                                                                                                                                                                                                                                                                                                                                                                                                                                                                                                                                                                                                                                                                                                                                                                                                                                                   |

## Cinahl

| #   | Query                                                                                          | Limiters/Expanders                            |
|-----|------------------------------------------------------------------------------------------------|-----------------------------------------------|
| S18 | S12 AND S17                                                                                    | Language: Danish, English, Norwegian, Swedish |
| S17 | S13 OR S14 OR S15 OR S16                                                                       |                                               |
| S16 | ((multiple or mixed) adj1 (treatment* or therap*) N1 comparison*) or (indirect N1 comparison*) |                                               |

|     |                                                                                                                                                                                                                                                                                                                                                                                                                                                                                                                                                                                                                                                                                                                                                                                                                                      |  |
|-----|--------------------------------------------------------------------------------------------------------------------------------------------------------------------------------------------------------------------------------------------------------------------------------------------------------------------------------------------------------------------------------------------------------------------------------------------------------------------------------------------------------------------------------------------------------------------------------------------------------------------------------------------------------------------------------------------------------------------------------------------------------------------------------------------------------------------------------------|--|
| S15 | (pool* N1 (data or analys*))                                                                                                                                                                                                                                                                                                                                                                                                                                                                                                                                                                                                                                                                                                                                                                                                         |  |
| S14 | ((systematic or rapid or integrative or umbrella) N3 (review* or overview* or study or studies or search* or approach* or analys*)) or guideline* or recommendations or meta analy* or meta-analy* or metaanaly*)                                                                                                                                                                                                                                                                                                                                                                                                                                                                                                                                                                                                                    |  |
| S13 | PT (Systematic Review or Meta Analysis) or MH ("Systematic Review+" or "Meta Analysis+")                                                                                                                                                                                                                                                                                                                                                                                                                                                                                                                                                                                                                                                                                                                                             |  |
| S12 | S4 AND S11                                                                                                                                                                                                                                                                                                                                                                                                                                                                                                                                                                                                                                                                                                                                                                                                                           |  |
| S11 | S5 OR S6 OR S7 OR S8 OR S9 OR S10                                                                                                                                                                                                                                                                                                                                                                                                                                                                                                                                                                                                                                                                                                                                                                                                    |  |
| S10 | ((non-pharma* or nonpharma* or non pharma* or non-drug or nondrug or non drug or non-surgical or nonsurgical or non surgical or non-surgery or nonsurgery or non surgery or non-invasive or noninvasive or non invasive or complimentary or integrat* or holistic or multi-modal* or multimodal* or Multidisciplinary or Multi-disciplinary or Interdisciplinary or Inter-disciplinary or complex or multimodal* or multi-modal* or cross-disciplinary or crossdisciplinary or multi-dimensional or multidimensional or biopsychosocial or bio-psycho-social or multi-facet* or multifacet* or comprehensive or multiple or physiotherapy or physical therap*) N3 (therap* or treat* or intervention* or action* or program* or strateg* or protocol* or support* or approach* or evaluation or rehabilitation or care or session*)) |  |
| S9  | ((Trigger N2 point*) or (auricul N2 acupuncture) or (warm N2 acupuncture) or (dry N1 (needle* or needling)))                                                                                                                                                                                                                                                                                                                                                                                                                                                                                                                                                                                                                                                                                                                         |  |
| S8  | (mox?bustion or acupuncture* or acu-puncture* or needle* or needling or electroacupuncture or electro-acupuncture or acupressure)                                                                                                                                                                                                                                                                                                                                                                                                                                                                                                                                                                                                                                                                                                    |  |
| S7  | MH "Dry needling"                                                                                                                                                                                                                                                                                                                                                                                                                                                                                                                                                                                                                                                                                                                                                                                                                    |  |
| S6  | MH Acupressure                                                                                                                                                                                                                                                                                                                                                                                                                                                                                                                                                                                                                                                                                                                                                                                                                       |  |
| S5  | MH "Acupuncture+"                                                                                                                                                                                                                                                                                                                                                                                                                                                                                                                                                                                                                                                                                                                                                                                                                    |  |
| S4  | S1 OR S2 OR S3                                                                                                                                                                                                                                                                                                                                                                                                                                                                                                                                                                                                                                                                                                                                                                                                                       |  |
| S3  | SU (headache* or head ache* or head pain or cephalalgia* or cephalgia* or migraine* or Cephalodynia* or cranial pain or hemicranias* or cerebral pain or cranialgia*)                                                                                                                                                                                                                                                                                                                                                                                                                                                                                                                                                                                                                                                                |  |
| S2  | (headache* or head ache* or head pain or cephalalgia* or cephalgia* or migraine* or Cephalodynia* or cranial pain or hemicranias* or cerebral pain or cranialgia*)                                                                                                                                                                                                                                                                                                                                                                                                                                                                                                                                                                                                                                                                   |  |
| S1  | MH "Headache" or MH "Headache, Primary" or MH "Migraine" or MH "Tension headache"                                                                                                                                                                                                                                                                                                                                                                                                                                                                                                                                                                                                                                                                                                                                                    |  |

---

**PEDRO**

Abstract & Title: headache or migraine\*

Method: Practice guideline or Systematic review

---

## Search for randomized controlled trials/controlled trials

---

### Should patients with tension-type headache be offered treatment with manual joint-mobilizing techniques besides usual care?

Search date: 08.07.2020

#### Medline

Database(s): **Ovid MEDLINE(R) and Epub Ahead of Print, In-Process & Other Non-Indexed Citations, Daily and Versions(R)** 1946 to July 07, 2020

Search Strategy:

| #  | Searches                                                                                                                                                                             |
|----|--------------------------------------------------------------------------------------------------------------------------------------------------------------------------------------|
| 1  | Headache Disorders, Primary/                                                                                                                                                         |
| 2  | exp Tension-Type Headache/                                                                                                                                                           |
| 3  | ((tension* or tension-type) adj2 (headache* or head ache*)).ti,bt,ab,kw,kf.                                                                                                          |
| 4  | or/1-3                                                                                                                                                                               |
| 5  | exp Musculoskeletal Manipulations/                                                                                                                                                   |
| 6  | Manipulation, Chiropractic/                                                                                                                                                          |
| 7  | Manipulation, Orthopedic/                                                                                                                                                            |
| 8  | Manipulation, Osteopathic/                                                                                                                                                           |
| 9  | Manipulation, Spinal/                                                                                                                                                                |
| 10 | Osteopathic Medicine/                                                                                                                                                                |
| 11 | exp Physical therapy modalities/                                                                                                                                                     |
| 12 | (adjust* adj6 (chiropract* or spinal or spine or lumbar or cervical or neck or thoracic or instrument* or tool* or electric)).ti,bt,ab,kf.                                           |
| 13 | (HVLA or high velocity low amplitude).ti,bt,ab,kw.                                                                                                                                   |
| 14 | (manipulat* and (chiropract* or naprapath* or osteopath* or oosteopath* or orthopedic* or orthopaedic*)).ti,bt,ab,kf.                                                                |
| 15 | (manipulat* and (spinal or spine or low* back or joint* or lumbar or neck or thoracic or cervical or cervix or MSK or musculoskeletal or musculo-skeletal or vertebr*)).ti,bt,ab,kf. |
| 16 | (manipulat* and (physiotherap* or physical therap*)).ti,bt,ab,kf.                                                                                                                    |
| 17 | (manipulat* and technique*).ti,bt,ab,kw,kf.                                                                                                                                          |
| 18 | (mobili#at* and (chiropract* or naprapath* or osteopath* or oosteopath* or orthopedic* or orthopaedic* or physical therap* or physiotherap*)).ti,bt,ab,kf.                           |

|    |                                                                                                                                                                                                                                                                                                                                                                                                                                                                                                                                                                                                                                                                                                                                                                                                                                                                  |
|----|------------------------------------------------------------------------------------------------------------------------------------------------------------------------------------------------------------------------------------------------------------------------------------------------------------------------------------------------------------------------------------------------------------------------------------------------------------------------------------------------------------------------------------------------------------------------------------------------------------------------------------------------------------------------------------------------------------------------------------------------------------------------------------------------------------------------------------------------------------------|
| 19 | (mobili#at* and (spinal or spine or low* back or joint* or lumbar or neck or thoracic or cervical or cervix or MSK or musculoskeletal or musculo-skeletal or vertebr*)).ti,bt,ab,kf.                                                                                                                                                                                                                                                                                                                                                                                                                                                                                                                                                                                                                                                                             |
| 20 | ((manual or manipul* or mobili#at* or MSK or movement or musculoskeletal or musculo-skeletal or neurorehabilitati* or neuro-rehabilitati* or physical) adj6 (therap* or treat* or intervention* or action* or program* or strateg* or protocol* or support* or approach* or evaluation)).ti,bt,ab,kf.                                                                                                                                                                                                                                                                                                                                                                                                                                                                                                                                                            |
| 21 | OMT.ti,bt,ab,kw,kf.                                                                                                                                                                                                                                                                                                                                                                                                                                                                                                                                                                                                                                                                                                                                                                                                                                              |
| 22 | ((trigger point or motion or passive or cpm) adj2 therap*).ti,bt,ab,kw,kf.                                                                                                                                                                                                                                                                                                                                                                                                                                                                                                                                                                                                                                                                                                                                                                                       |
| 23 | (traction adj3 (manual or passive or mechanical or non-surgical or nonsurgical)).ti,bt,ab,kf.                                                                                                                                                                                                                                                                                                                                                                                                                                                                                                                                                                                                                                                                                                                                                                    |
| 24 | (flexion-distraction or flexion distraction).ti,bt,ab,kf.                                                                                                                                                                                                                                                                                                                                                                                                                                                                                                                                                                                                                                                                                                                                                                                                        |
| 25 | (activator adj3 (method* or technique* or instrument*)).ti,bt,ab,kf.                                                                                                                                                                                                                                                                                                                                                                                                                                                                                                                                                                                                                                                                                                                                                                                             |
| 26 | ((mechanical or Alexander or Atlas Orthogonal or Atlas Specific or Bilateral Nasal Specific or Blair Upper Cervical or Chiropractic Manipulative Reflex or Cox or Derifield-Thompson or Directional Non-Force or Diversified or Endo-Nasal or feldenkrais or William or Flexion-Distraction or Full Spine or Gonstead or Grostic or Harrison or Koren Specific or Logan Basic or McTimoney or Maitland or Mulligan or muligan or Neuro Emotional or NUCCA or Palmer or Pierce-Stillwagon or Sacro Occipital or Thompson Terminal Point or Toftness or Toggle Recoil or Torque Release or Webster or muscle energy) adj1 (Technique* or model* or tool* or exercise* or therapy)).ti,bt,ab,kw,kf.                                                                                                                                                                 |
| 27 | (reflexolog* or cyriax or High velocity or low amplitude or Subluxation or Joint dysfunction or hypomobility or muscle energy technique* or therapeutic touch or stretching or acupressure or o?steopath*).ti,bt,ab,kw,kf.                                                                                                                                                                                                                                                                                                                                                                                                                                                                                                                                                                                                                                       |
| 28 | (vibration adj5 (therap* or treatment*)).ti,bt,ab,kw,kf.                                                                                                                                                                                                                                                                                                                                                                                                                                                                                                                                                                                                                                                                                                                                                                                                         |
| 29 | ((non-pharma* or nonpharma* or non pharma* or non-drug or nondrug or non drug or non-surgical or nonsurgical or non surgical or non-surgery or nonsurgery or non surgery or non-invasive or noninvasive or non invasive or complimentary or integrat* or holistic or multi-modal* or multimodal* or Multidisciplinary or Multi-disciplinary or Interdisciplinary or Inter-disciplinary or complex or multimodal* or multi-modal* or cross-disciplinary or crossdisciplinary or multi-dimensional or multidimensional or biopsychosocial or bio-psycho-social or multi-facet* or multifacet* or comprehensive or multiple or addition* or physiotherapy or physical therap*) adj6 (therap* or treat* or intervention* or action* or program* or strateg* or protocol* or support* or approach* or evaluation or rehabilitation or care or session*)).ti,bt,kw,kf. |
| 30 | or/5-29                                                                                                                                                                                                                                                                                                                                                                                                                                                                                                                                                                                                                                                                                                                                                                                                                                                          |
| 31 | 4 and 30                                                                                                                                                                                                                                                                                                                                                                                                                                                                                                                                                                                                                                                                                                                                                                                                                                                         |
| 32 | limit 31 to (randomized controlled trial or controlled clinical trial)                                                                                                                                                                                                                                                                                                                                                                                                                                                                                                                                                                                                                                                                                                                                                                                           |
| 33 | ((((random* or cluster-random* or quasi-random* or control?ed or crossover or cross-over or blind* or mask*) adj4 (trial*1 or study or studies or analy*)) or rct).ti,bt,ab,kf.                                                                                                                                                                                                                                                                                                                                                                                                                                                                                                                                                                                                                                                                                  |
| 34 | (placebo* or single-blind* or double-blind* or triple-blind*).ti,bt,ab,kf.                                                                                                                                                                                                                                                                                                                                                                                                                                                                                                                                                                                                                                                                                                                                                                                       |

|    |                                                                                                                      |
|----|----------------------------------------------------------------------------------------------------------------------|
| 35 | ((single or double or triple) adj2 (blind* or mask*)).ti,bt,ab,kf.                                                   |
| 36 | ((patient* or person* or participant* or population* or allocate* or assign*) adj3 (random* or blind* or mask*)).tw. |
| 37 | or/33-36                                                                                                             |
| 38 | 31 and 37                                                                                                            |
| 39 | 32 or 38                                                                                                             |
| 40 | limit 39 to (yr="2017-2020" and (english or danish or norwegian or swedish))                                         |

## Embase

Database(s): **Embase** 1974 to 2020 July 07

Search Strategy:

| #  | Searches                                                                                                                                                                          |
|----|-----------------------------------------------------------------------------------------------------------------------------------------------------------------------------------|
| 1  | exp tension headache/                                                                                                                                                             |
| 2  | primary headache/                                                                                                                                                                 |
| 3  | ((tension* or tension-type) adj2 (headache* or head ache*)).ti,ab,kw.                                                                                                             |
| 4  | or/1-3                                                                                                                                                                            |
| 5  | exp musculoskeletal manipulation/                                                                                                                                                 |
| 6  | exp physiotherapy/                                                                                                                                                                |
| 7  | exp Osteopathy/                                                                                                                                                                   |
| 8  | (adjust* adj6 (chiropract* or spinal or spine or lumbar or cervical or neck or thoracic or instrument* or tool* or electric)).ti,ab,kw.                                           |
| 9  | (HVLA or high velocity low amplitude).ti,ab,kw.                                                                                                                                   |
| 10 | (manipulat* and (chiropract* or naprapath* or osteopath* or oosteopath* or orthopedic* or orthopaedic*)).ti,ab,kw.                                                                |
| 11 | (manipulat* and (spinal or spine or low* back or joint* or lumbar or neck or thoracic or cervical or cervix or MSK or musculoskeletal or musculo-skeletal or vertebr*)).ti,ab,kw. |
| 12 | (manipulat* and (physiotherap* or physical therap*)).ti,ab,kw.                                                                                                                    |
| 13 | (manipulat* and technique*).ti,ab,kw.                                                                                                                                             |
| 14 | (mobili?at* and (chiropract* or naprapath* or osteopath* or orthopedic* or orthopaedic* or physical therap* or physiotherap*)).ti,ab,kw.                                          |
| 15 | (mobili?at* and (spinal or spine or low* back or joint* or lumbar or neck or thoracic or cervical or MSK or musculoskeletal or vertebr*)).ti,ab,kw.                               |

|    |                                                                                                                                                                                                                                                                                                                                                                                                                                                                                                                                                                                                                                                                                                                                                                                                                                                |
|----|------------------------------------------------------------------------------------------------------------------------------------------------------------------------------------------------------------------------------------------------------------------------------------------------------------------------------------------------------------------------------------------------------------------------------------------------------------------------------------------------------------------------------------------------------------------------------------------------------------------------------------------------------------------------------------------------------------------------------------------------------------------------------------------------------------------------------------------------|
| 16 | ((manual or manipulat* or mobili?at* or MSK or musculoskeletal or musculo-skeletal or neurorehabilitati* or neuro-rehabilitati* or physical) adj6 (therap* or treat* or intervention* or action* or program* or strateg* or protocol* or support* or approach* or evaluation)).ti,ab,kw.                                                                                                                                                                                                                                                                                                                                                                                                                                                                                                                                                       |
| 17 | (traction adj3 (manual or passive or mechanical or non-surgical or nonsurgical)).ti,ab,kw.                                                                                                                                                                                                                                                                                                                                                                                                                                                                                                                                                                                                                                                                                                                                                     |
| 18 | (flexion-distraction or flexion distraction).ti,ab,kw.                                                                                                                                                                                                                                                                                                                                                                                                                                                                                                                                                                                                                                                                                                                                                                                         |
| 19 | ((activator or physiotherapy or physical therapy) adj3 (method* or technique* or instrument*)).ti,ab,kw.                                                                                                                                                                                                                                                                                                                                                                                                                                                                                                                                                                                                                                                                                                                                       |
| 20 | ((mechanical or Alexander or Atlas Orthogonal or Atlas Specific or Bilateral Nasal Specific or Blair Upper Cervical or Chiropractic Manipulative Reflex or Cox or Derifield-Thompson or Directional Non-Force or Diversified or Endo-Nasal or feldenkrais or William or Flexion-Distraction or Full Spine or Gonstead or Grostic or Harrison or Koren Specific or Logan Basic or McTimoney or Maitland or Mulligan or muligan or Neuro Emotional or NUCCA or Palmer or Pierce-Stillwagon or Sacro Occipital or Thompson Terminal Point or Toftness or Toggle Recoil or Torque Release or Webster or muscle energy) adj1 (Technique* or model* or tool* or exercise* or therapy)).ti,ab,kw.                                                                                                                                                     |
| 21 | (reflexolog* or cyriax or High velocity or low amplitude or Subluxation or Joint dysfunction or hypomobility or muscle energy technique* or therapeutic touch or stretching or acupressure or o?steopath*).ti,ab,kw.                                                                                                                                                                                                                                                                                                                                                                                                                                                                                                                                                                                                                           |
| 22 | OMT.ti,ab,kw.                                                                                                                                                                                                                                                                                                                                                                                                                                                                                                                                                                                                                                                                                                                                                                                                                                  |
| 23 | (vibration adj5 (therap* or treatment*)).ti,ab,kw.                                                                                                                                                                                                                                                                                                                                                                                                                                                                                                                                                                                                                                                                                                                                                                                             |
| 24 | ((non-pharma* or nonpharma* or non pharma* or non-drug or nondrug or non drug or non-surgical or nonsurgical or non surgical or non-surgery or nonsurgery or non surgery or non-invasive or noninvasive or non invasive or complimentary or integrat* or holistic or multi-modal* or multimodal* or Multidisciplinary or Multi-disciplinary or Interdisciplinary or Inter-disciplinary or complex or multimodal* or multi-modal* or cross-disciplinary or crossdisciplinary or multi-dimensional or multidimensional or biopsychosocial or bio-psycho-social or multi-facet* or multifacet* or comprehensive or multiple or addition* or physiotherapy or physical therap*) adj6 (therap* or treat* or intervention* or action* or program* or strateg* or protocol* or support* or approach* or evaluation or rehabilitation or care)).ti,kw. |
| 25 | or/5-24                                                                                                                                                                                                                                                                                                                                                                                                                                                                                                                                                                                                                                                                                                                                                                                                                                        |
| 26 | 4 and 25                                                                                                                                                                                                                                                                                                                                                                                                                                                                                                                                                                                                                                                                                                                                                                                                                                       |
| 27 | limit 26 to (randomized controlled trial or controlled clinical trial)                                                                                                                                                                                                                                                                                                                                                                                                                                                                                                                                                                                                                                                                                                                                                                         |
| 28 | ((random* or cluster-random* or quasi-random* or control?ed or crossover or cross-over or blind* or mask*) adj4 (trial*1 or study or studies or analy*)) or rct).ti,ab,kw.                                                                                                                                                                                                                                                                                                                                                                                                                                                                                                                                                                                                                                                                     |
| 29 | (placebo* or single-blind* or double-blind* or triple-blind*).ti,ab,kw.                                                                                                                                                                                                                                                                                                                                                                                                                                                                                                                                                                                                                                                                                                                                                                        |
| 30 | ((single or double or triple) adj2 (blind* or mask*)).ti,ab,kw.                                                                                                                                                                                                                                                                                                                                                                                                                                                                                                                                                                                                                                                                                                                                                                                |
| 31 | ((patient* or person* or participant* or population* or allocate* or assign*) adj3 (random* or blind* or mask*)).ti,ab,kw.                                                                                                                                                                                                                                                                                                                                                                                                                                                                                                                                                                                                                                                                                                                     |

|    |                                                                              |
|----|------------------------------------------------------------------------------|
| 32 | or/28-31                                                                     |
| 33 | 26 and 32                                                                    |
| 34 | 27 or 33                                                                     |
| 35 | limit 34 to (yr="2017-2020" and (danish or english or norwegian or swedish)) |

---

## Cochrane Central

| ID  | Search                                                                                                                                                                                                                                                                                                                                                                                                                                                                                                                                                                                                                                                                                      | Hits |
|-----|---------------------------------------------------------------------------------------------------------------------------------------------------------------------------------------------------------------------------------------------------------------------------------------------------------------------------------------------------------------------------------------------------------------------------------------------------------------------------------------------------------------------------------------------------------------------------------------------------------------------------------------------------------------------------------------------|------|
| #1  | MeSH descriptor: [Headache Disorders, Primary] this term only                                                                                                                                                                                                                                                                                                                                                                                                                                                                                                                                                                                                                               |      |
| #2  | MeSH descriptor: [Tension-Type Headache] explode all trees                                                                                                                                                                                                                                                                                                                                                                                                                                                                                                                                                                                                                                  |      |
| #3  | ((tension* or tension-type) NEAR/2 (headache* or head ache*)):ti,ab,kw                                                                                                                                                                                                                                                                                                                                                                                                                                                                                                                                                                                                                      |      |
| #4  | #1 or #2 #3                                                                                                                                                                                                                                                                                                                                                                                                                                                                                                                                                                                                                                                                                 |      |
| #5  | MeSH descriptor: [Musculoskeletal Manipulations] explode all trees                                                                                                                                                                                                                                                                                                                                                                                                                                                                                                                                                                                                                          |      |
| #6  | (adjust* NEAR/6 (chiropract* or spinal or lumbar or cervical or thoracic or instrument* or tool* or electric)):ti,ab,kw                                                                                                                                                                                                                                                                                                                                                                                                                                                                                                                                                                     |      |
| #7  | (HVLA or high velocity low amplitude):ti,ab,kw                                                                                                                                                                                                                                                                                                                                                                                                                                                                                                                                                                                                                                              |      |
| #8  | (manipulat* and (chiropract* or naprapath* or oosteopath* or osteopath* or osteopath* or orthopedic* or orthopaedic*)):ti,ab,kw                                                                                                                                                                                                                                                                                                                                                                                                                                                                                                                                                             |      |
| #9  | (manipulat* and (spinal or spine or low* back or joint* or lumbar or neck or thoracic or cervical or MSK or musculoskeletal or vertebr*)):ti,ab,kw                                                                                                                                                                                                                                                                                                                                                                                                                                                                                                                                          |      |
| #10 | (manipulat* and (physiotherap* or physical therap*)):ti,ab,kw                                                                                                                                                                                                                                                                                                                                                                                                                                                                                                                                                                                                                               |      |
| #11 | (manipulat* and technique*):ti,ab,kw                                                                                                                                                                                                                                                                                                                                                                                                                                                                                                                                                                                                                                                        |      |
| #12 | (mobili?at* and (chiropract* or naprapath* or osteopath* or osteopath* or orthopedic* or orthopaedic*)):ti,ab,kw                                                                                                                                                                                                                                                                                                                                                                                                                                                                                                                                                                            |      |
| #13 | ((therap* or treat* or intervention* or manag* or rehabilit* or neurorehabilitation or strateg*) NEAR/6 (manual or manipulat* or mobili?at* or MSK or musculoskeletal)):ti,ab,kw                                                                                                                                                                                                                                                                                                                                                                                                                                                                                                            |      |
| #14 | (traction NEAR/3 (manual or passive or mechanical or non-surgical or nonsurgical)):ti,ab,kw                                                                                                                                                                                                                                                                                                                                                                                                                                                                                                                                                                                                 |      |
| #15 | (flexion-distraction or flexion distraction):ti,ab,kw                                                                                                                                                                                                                                                                                                                                                                                                                                                                                                                                                                                                                                       |      |
| #16 | (activator NEAR/3 (method* or technique* or instrument*)):ti,ab,kw                                                                                                                                                                                                                                                                                                                                                                                                                                                                                                                                                                                                                          |      |
| #17 | ((mechanical or Alexander or Atlas Orthogonal or Atlas Specific or Bilateral Nasal Specific or Blair Upper Cervical or Chiropractic Manipulative Reflex or Cox or Derifield-Thompson or Directional Non-Force or Diversified or Endo-Nasal or feldenkrais or William or Flexion-Distraction or Full Spine or Gonstead or Grostic or Harrison or Koren Specific or Logan Basic or McTimoney or Maitland or Mulligan or muligan or Neuro Emotional or NUCCA or Palmer or Pierce-Stillwagon or Sacro Occipital or Thompson Terminal Point or Toftness or Toggle Recoil or Torque Release or Webster or muscle energy) NEAR/1 (Technique* or model* or tool* or exercise* or therapy)):ti,ab,kw |      |
| #18 | (reflexolog* or cyriax or High velocity or low amplitude or Subluxation or Joint dysfunction or hypomobility or muscle energy technique* or therapeutic touch or stretching):ti,ab,kw                                                                                                                                                                                                                                                                                                                                                                                                                                                                                                       |      |
| #19 | #5 or #6 or #7 or #8 or #9 or #10 or #11 or #12 or #13 or #14 or #15 or #16 or #17 or #18                                                                                                                                                                                                                                                                                                                                                                                                                                                                                                                                                                                                   |      |
| #20 | #4 AND #19 with Publication Year from 2017 to 2020, in Trials                                                                                                                                                                                                                                                                                                                                                                                                                                                                                                                                                                                                                               |      |

---



## Cinahl

| #   | Query                                                                                                                                                                                                                                                                                                                                                                                                                                                                                                                                                                                                                                                                                                                                                                                                                                | Limiters/Expanders                                                                          |
|-----|--------------------------------------------------------------------------------------------------------------------------------------------------------------------------------------------------------------------------------------------------------------------------------------------------------------------------------------------------------------------------------------------------------------------------------------------------------------------------------------------------------------------------------------------------------------------------------------------------------------------------------------------------------------------------------------------------------------------------------------------------------------------------------------------------------------------------------------|---------------------------------------------------------------------------------------------|
| S22 | S16 AND S21                                                                                                                                                                                                                                                                                                                                                                                                                                                                                                                                                                                                                                                                                                                                                                                                                          | Limiters - Published Date: 20170101-20200731; Language: Danish, English, Norwegian, Swedish |
| S21 | S17 OR S18 OR S19 OR S20                                                                                                                                                                                                                                                                                                                                                                                                                                                                                                                                                                                                                                                                                                                                                                                                             |                                                                                             |
| S20 | ((patient* or person* or participant* or population* or allocate* or assign*) N3 (random* or blind* or mask*))                                                                                                                                                                                                                                                                                                                                                                                                                                                                                                                                                                                                                                                                                                                       |                                                                                             |
| S19 | (placebo* or single-blind* or double-blind* or triple-blind* or ((single or double or triple) N1 (blind* or mask*))                                                                                                                                                                                                                                                                                                                                                                                                                                                                                                                                                                                                                                                                                                                  |                                                                                             |
| S18 | ((((random* or cluster-random* or quasi-random* or control#ed or crossover or cross-over or blind* or mask*) N4 (trial* or study or studies or analy*)) or rct)                                                                                                                                                                                                                                                                                                                                                                                                                                                                                                                                                                                                                                                                      |                                                                                             |
| S17 | PT Randomized Controlled Trial                                                                                                                                                                                                                                                                                                                                                                                                                                                                                                                                                                                                                                                                                                                                                                                                       |                                                                                             |
| S16 | S4 AND S15                                                                                                                                                                                                                                                                                                                                                                                                                                                                                                                                                                                                                                                                                                                                                                                                                           |                                                                                             |
| S15 | S5 OR S6 OR S7 OR S8 OR S9 OR S10 OR S11 OR S12 OR S13 OR S14                                                                                                                                                                                                                                                                                                                                                                                                                                                                                                                                                                                                                                                                                                                                                                        |                                                                                             |
| S14 | ((non-pharma* or nonpharma* or non pharma* or non-drug or nondrug or non drug or non-surgical or nonsurgical or non surgical or non-surgery or nonsurgery or non surgery or non-invasive or noninvasive or non invasive or complimentary or integrat* or holistic or multi-modal* or multimodal* or Multidisciplinary or Multi-disciplinary or Interdisciplinary or Inter-disciplinary or complex or multimodal* or multi-modal* or cross-disciplinary or crossdisciplinary or multi-dimensional or multidimensional or biopsychosocial or bio-psycho-social or multi-facet* or multifacet* or comprehensive or multiple or physiotherapy or physical therap*) N3 (therap* or treat* or intervention* or action* or program* or strateg* or protocol* or support* or approach* or evaluation or rehabilitation or care or session*)) |                                                                                             |
| S13 | (vibration N5 (therap* or treatment*))                                                                                                                                                                                                                                                                                                                                                                                                                                                                                                                                                                                                                                                                                                                                                                                               |                                                                                             |
| S12 | reflexolog* or cyriax or High velocity or low amplitude or Subluxation or Joint dysfunction or hypomobility or muscle energy technique* or therapeutic touch or stretching or acupressure or o#steopath*                                                                                                                                                                                                                                                                                                                                                                                                                                                                                                                                                                                                                             |                                                                                             |
| S11 | ((mechanical or Alexander or Atlas Orthogonal or Atlas Specific or Bilateral Nasal Specific or Blair Upper Cervical or Chiropractic Manipulative Reflex or Cox or Derifield-Thompson or Directional                                                                                                                                                                                                                                                                                                                                                                                                                                                                                                                                                                                                                                  |                                                                                             |

|     |                                                                                                                                                                                                                                                                                                                                                                                                                                                                                                                 |  |
|-----|-----------------------------------------------------------------------------------------------------------------------------------------------------------------------------------------------------------------------------------------------------------------------------------------------------------------------------------------------------------------------------------------------------------------------------------------------------------------------------------------------------------------|--|
|     | Non-Force or Diversified or Endo-Nasal or feldenkrais or William or Flexion-Distraction or Full Spine or Gonstead or Grostic or Harrison or Koren Specific or Logan Basic or McTimoney or Maitland or Mulligan or muligan or Neuro Emotional or NUCCA or Palmer or Pierce-Stillwagon or Sacro Occipital or Thompson Terminal Point or Toftness or Toggle Recoil or Torque Release or Webster or muscle energy or physical therapy or physiotherapy) N1 (Technique* or model* or tool* or exercise* or therapy)) |  |
| S10 | ((manual or manipulat* or mobili?at* or MSK or musculoskeletal or musculo-skeletal or neurorehabilitati* or neuro-rehabilitati* or physical) N6 (therap* or treat* or intervention* or action* or program* or strateg* or protocol* or support* or approach* or evaluation or session*)) or ((traction N3 (manual or passive or mechanical or non-surgical or nonsurgical))) or (activator N3 (method* or technique* or instrument*))                                                                           |  |
| S9  | (mobili?at* and (chiropract* or naprapath* or osteopath* or oosteopath* or orthopedic* or orthopaedic* or spinal or spine or low* back or joint* or lumbar or neck or thoracic or cervical or cervix or MSK or musculoskeletal or musculo-skeletal or vertebr*))                                                                                                                                                                                                                                                |  |
| S8  | (manipulat* and (chiropract* or naprapath* or osteopath* or oosteopath* or orthopedic* or orthopaedic* or spinal or spine or low* back or joint* or lumbar or neck or thoracic or cervical or cervix or MSK or musculoskeletal or musculo-skeletal or vertebr* or physiotherap* or physical therap* or technique*))                                                                                                                                                                                             |  |
| S7  | HVLA or high velocity low amplitude or flexion-distraction or flexion distraction                                                                                                                                                                                                                                                                                                                                                                                                                               |  |
| S6  | (adjust* N6 (chiropract* or spinal or spine or lumbar or cervical or neck or thoracic or instrument* or tool* or electric))                                                                                                                                                                                                                                                                                                                                                                                     |  |
| S5  | MH "Physical therapy" or MH "Manual therapy+" or MH "Joint mobilization"                                                                                                                                                                                                                                                                                                                                                                                                                                        |  |
| S4  | S1 OR S2 OR S3                                                                                                                                                                                                                                                                                                                                                                                                                                                                                                  |  |
| S3  | SU ((tension* or tension-type) N2 headache*)                                                                                                                                                                                                                                                                                                                                                                                                                                                                    |  |
| S2  | (tension* or tension-type) N2 headache*                                                                                                                                                                                                                                                                                                                                                                                                                                                                         |  |
| S1  | MH "Headache, Primary" or MH "Tension Headache"                                                                                                                                                                                                                                                                                                                                                                                                                                                                 |  |

## PEDRO

Abstract & Title: tension-type headache\* or tension headache\*

Therapy: stretching, mobilization, manipulation, massage

Method: Clinical Trial

Published since: 2017

---

## Should patients with tension-type headache be offered physical activity?

Search date: 08.07.2020

### Medline

Database(s): **Ovid MEDLINE(R) and Epub Ahead of Print, In-Process & Other Non-Indexed Citations, Daily and Versions(R)** 1946 to July 07, 2020

Search Strategy:

| #  | Searches                                                                                                                                                                                                                                                                                                                                                                                                                                                                                                                                                           |
|----|--------------------------------------------------------------------------------------------------------------------------------------------------------------------------------------------------------------------------------------------------------------------------------------------------------------------------------------------------------------------------------------------------------------------------------------------------------------------------------------------------------------------------------------------------------------------|
| 1  | Headache Disorders, Primary/                                                                                                                                                                                                                                                                                                                                                                                                                                                                                                                                       |
| 2  | exp Tension-Type Headache/                                                                                                                                                                                                                                                                                                                                                                                                                                                                                                                                         |
| 3  | ((tension* or tension-type) adj2 (headache* or head ache*)).ti,bt,ab,kw,kf.                                                                                                                                                                                                                                                                                                                                                                                                                                                                                        |
| 4  | or/1-3                                                                                                                                                                                                                                                                                                                                                                                                                                                                                                                                                             |
| 5  | exp exercise/                                                                                                                                                                                                                                                                                                                                                                                                                                                                                                                                                      |
| 6  | exp exercise therapy/                                                                                                                                                                                                                                                                                                                                                                                                                                                                                                                                              |
| 7  | exp Sports/                                                                                                                                                                                                                                                                                                                                                                                                                                                                                                                                                        |
| 8  | exp Physical Exertion/                                                                                                                                                                                                                                                                                                                                                                                                                                                                                                                                             |
| 9  | exp Muscle strength/                                                                                                                                                                                                                                                                                                                                                                                                                                                                                                                                               |
| 10 | exp Exercise Movement Techniques/                                                                                                                                                                                                                                                                                                                                                                                                                                                                                                                                  |
| 11 | exp "Physical Education and Training"/                                                                                                                                                                                                                                                                                                                                                                                                                                                                                                                             |
| 12 | Weight-Bearing/                                                                                                                                                                                                                                                                                                                                                                                                                                                                                                                                                    |
| 13 | Tai Ji/                                                                                                                                                                                                                                                                                                                                                                                                                                                                                                                                                            |
| 14 | Yoga/                                                                                                                                                                                                                                                                                                                                                                                                                                                                                                                                                              |
| 15 | Qigong/                                                                                                                                                                                                                                                                                                                                                                                                                                                                                                                                                            |
| 16 | physical therapy modalities/                                                                                                                                                                                                                                                                                                                                                                                                                                                                                                                                       |
| 17 | (exercis* or train* or stepped care or physical therap* or physiotherap* or kinesiotherapy).ti,bt,kw,kf.                                                                                                                                                                                                                                                                                                                                                                                                                                                           |
| 18 | (physical adj1 (education or program*)).ti,bt,ab,kw,kf.                                                                                                                                                                                                                                                                                                                                                                                                                                                                                                            |
| 19 | (exercise adj3 (session* or training or technique* or physical or isometric or therap* or program* or class*)).ti,bt,ab,kw,kf.                                                                                                                                                                                                                                                                                                                                                                                                                                     |
| 20 | ((muscl* or resistance or physical or endurance or strength* or balance or postur* or gait or threshold* or treadmill* or aquatic* or trunk or graded or gradual or progressive or controlled or incremented or symptom-based or symptombased or symptom based or guided or supervis* or coached or coaching or stepped care or stepwise or step-wise) adj3 (train* or retrain* or re-train* or exercise* or rehabilitation or strength* or fit* or condition* or exposure or activit* or exertion or load* or physical therap* or physiotherap*)).ti,bt,ab,kw,kf. |

|    |                                                                                                                                                                                                                                                                                                                                                                                                                                                                                                                                                                                                                                                                                                                                                                                                                                                      |
|----|------------------------------------------------------------------------------------------------------------------------------------------------------------------------------------------------------------------------------------------------------------------------------------------------------------------------------------------------------------------------------------------------------------------------------------------------------------------------------------------------------------------------------------------------------------------------------------------------------------------------------------------------------------------------------------------------------------------------------------------------------------------------------------------------------------------------------------------------------|
| 21 | (active rehabilitation or aerobic* or anaerobic* or movement therapy or waterygym* or water gym* or aquagym or gym* or hydrotherap* or (warm water adj4 (exercis* or train* or rehab*)) or pilates).ti,bt,ab,kw,kf.                                                                                                                                                                                                                                                                                                                                                                                                                                                                                                                                                                                                                                  |
| 22 | (running or Skate* or skating or skiing or Jog* or zumba or kettlebelt or Swim* or Bicycl* or cycling or bicycling or fitness bike* or exercise bike* or spinning or walk* or rowing or rower or water-rower* or waterrower* or cross-train* or crosstrain* or pacing or paced or titreted or (weight* adj3 (lift* or train* or exercis*))).ti,bt,ab,kw,kf.                                                                                                                                                                                                                                                                                                                                                                                                                                                                                          |
| 23 | (yoga or tai ji or tai chi or qigong or qi-gong or pilates*).ti,bt,ab,kw,kf.                                                                                                                                                                                                                                                                                                                                                                                                                                                                                                                                                                                                                                                                                                                                                                         |
| 24 | ((mckenzie or mechanical or Alexander or William or Feldenkrais) adj2 (technique* or model* or tool* or exercise* or therapy)).ti,bt,ab,kw,kf.                                                                                                                                                                                                                                                                                                                                                                                                                                                                                                                                                                                                                                                                                                       |
| 25 | (neurorehabilitati* or neuro-rehabilitati*).ti,bt,ab,kw,kf.                                                                                                                                                                                                                                                                                                                                                                                                                                                                                                                                                                                                                                                                                                                                                                                          |
| 26 | ((non-pharma* or nonpharma* or non pharma* or non-drug or nondrug or non drug or non-surgical or nonsurgical or non surgical or non-surgery or nonsurgery or non surgery or non-invasive or noninvasive or non invasive or complimentary or integrat* or holistic or multi-modal* or multimodal* or Multidisciplinary or Multi-disciplinary or Interdisciplinary or Inter-disciplinary or complex or multimodal* or multi-modal* or cross-disciplinary or crossdisciplinary or multi-dimensional or multidimensional or biopsychosocial or bio-psycho-social or multi-facet* or multifacet* or comprehensive or multiple or addition* or physiotherapy or physical therap*) adj6 (therap* or treat* or intervention* or action* or program* or strateg* or protocol* or support* or approach* or evaluation or rehabilitation or care)).ti,bt,kw,kf. |
| 27 | or/5-26                                                                                                                                                                                                                                                                                                                                                                                                                                                                                                                                                                                                                                                                                                                                                                                                                                              |
| 28 | 4 and 27                                                                                                                                                                                                                                                                                                                                                                                                                                                                                                                                                                                                                                                                                                                                                                                                                                             |
| 29 | limit 28 to (randomized controlled trial or controlled clinical trial)                                                                                                                                                                                                                                                                                                                                                                                                                                                                                                                                                                                                                                                                                                                                                                               |
| 30 | ((random* or cluster-random* or quasi-random* or control?ed or crossover or cross-over or blind* or mask*) adj4 (trial*1 or study or studies or analy*)) or rct).ti,bt,ab,kf.                                                                                                                                                                                                                                                                                                                                                                                                                                                                                                                                                                                                                                                                        |
| 31 | (placebo* or single-blind* or double-blind* or triple-blind*).ti,ab,kf,hw.                                                                                                                                                                                                                                                                                                                                                                                                                                                                                                                                                                                                                                                                                                                                                                           |
| 32 | ((single or double or triple) adj2 (blind* or mask*)).ti,ab,kf,hw.                                                                                                                                                                                                                                                                                                                                                                                                                                                                                                                                                                                                                                                                                                                                                                                   |
| 33 | ((patient* or person* or participant* or population* or allocate* or assign*) adj3 (random* or blind* or mask*)).ti,ab,kf.                                                                                                                                                                                                                                                                                                                                                                                                                                                                                                                                                                                                                                                                                                                           |
| 34 | or/30-33                                                                                                                                                                                                                                                                                                                                                                                                                                                                                                                                                                                                                                                                                                                                                                                                                                             |
| 35 | 28 and 34                                                                                                                                                                                                                                                                                                                                                                                                                                                                                                                                                                                                                                                                                                                                                                                                                                            |
| 36 | 29 or 35                                                                                                                                                                                                                                                                                                                                                                                                                                                                                                                                                                                                                                                                                                                                                                                                                                             |
| 37 | limit 36 to (yr="2004-2020" and (danish or english or norwegian or swedish))                                                                                                                                                                                                                                                                                                                                                                                                                                                                                                                                                                                                                                                                                                                                                                         |

## Embase

Database(s): **Embase** 1974 to 2020 July 07

Search Strategy:

| #  | Searches                                                                                                                                                                                                                                                                                                                                                                                                                                                                                                                                                     |
|----|--------------------------------------------------------------------------------------------------------------------------------------------------------------------------------------------------------------------------------------------------------------------------------------------------------------------------------------------------------------------------------------------------------------------------------------------------------------------------------------------------------------------------------------------------------------|
| 1  | exp tension headache/                                                                                                                                                                                                                                                                                                                                                                                                                                                                                                                                        |
| 2  | primary headache/                                                                                                                                                                                                                                                                                                                                                                                                                                                                                                                                            |
| 3  | ((tension* or tension-type) adj2 (headache* or head ache*)).ti,ab,kw.                                                                                                                                                                                                                                                                                                                                                                                                                                                                                        |
| 4  | or/1-3                                                                                                                                                                                                                                                                                                                                                                                                                                                                                                                                                       |
| 5  | exp exercise/                                                                                                                                                                                                                                                                                                                                                                                                                                                                                                                                                |
| 6  | exp kinesiotherapy/                                                                                                                                                                                                                                                                                                                                                                                                                                                                                                                                          |
| 7  | exp Physical Exertion/                                                                                                                                                                                                                                                                                                                                                                                                                                                                                                                                       |
| 8  | exp Muscle strength/                                                                                                                                                                                                                                                                                                                                                                                                                                                                                                                                         |
| 9  | exp Exercise Movement Techniques/                                                                                                                                                                                                                                                                                                                                                                                                                                                                                                                            |
| 10 | exp "Physical Education and Training"/                                                                                                                                                                                                                                                                                                                                                                                                                                                                                                                       |
| 11 | Weight-Bearing/                                                                                                                                                                                                                                                                                                                                                                                                                                                                                                                                              |
| 12 | Tai Ji/                                                                                                                                                                                                                                                                                                                                                                                                                                                                                                                                                      |
| 13 | Yoga/                                                                                                                                                                                                                                                                                                                                                                                                                                                                                                                                                        |
| 14 | Qigong/                                                                                                                                                                                                                                                                                                                                                                                                                                                                                                                                                      |
| 15 | physiotherapy/                                                                                                                                                                                                                                                                                                                                                                                                                                                                                                                                               |
| 16 | (exercis* or train* or stepped care or physical therap* or physiotherap* or kinesiotherapy).ti,kw.                                                                                                                                                                                                                                                                                                                                                                                                                                                           |
| 17 | (physical adj1 (education or program*)).ti,ab,kw.                                                                                                                                                                                                                                                                                                                                                                                                                                                                                                            |
| 18 | (exercise adj3 (session* or training or technique* or physical or isometric or therap* or program* or class*)).ti,ab,kw.                                                                                                                                                                                                                                                                                                                                                                                                                                     |
| 19 | ((muscl* or resistance or physical or endurance or strength* or balance or postur* or gait or threshold* or treadmill* or aquatic* or trunk or graded or gradual or progressive or controlled or incremented or symptom-based or symptombased or symptom based or guided or supervis* or coached or coaching or stepped care or stepwise or step-wise) adj3 (train* or retrain* or re-train* or exercise* or rehabilitation or strength* or fit* or condition* or exposure or activit* or exertion or load* or physical therap* or physiotherap*)).ti,ab,kw. |
| 20 | (active rehabilitation or aerobic* or anaerobic* or movement therapy or watergym* or water gym* or aquagym or gym* or hydrotherap* or (warm water adj4 (exercis* or train* or rehab))).ti,ab,kw.                                                                                                                                                                                                                                                                                                                                                             |
| 21 | (running or Skate* or skating or skiing or Jog* or zumba or kettlebelt or Swim* or Bicycl* or cycling or bicycling or fitness bike* or exercise bike* or spinning or walk* or rowing or rower or water-rower* or waterrower* or cross-train* or crosstrain* or pacing or paced or titreted or (weight* adj3 (lift* or train* or exercis*))).ti,ab,kw.                                                                                                                                                                                                        |

|    |                                                                                                                                                                                                                                                                                                                                                                                                                                                                                                                                                                                                                                                                                                                                                                                                                                                            |
|----|------------------------------------------------------------------------------------------------------------------------------------------------------------------------------------------------------------------------------------------------------------------------------------------------------------------------------------------------------------------------------------------------------------------------------------------------------------------------------------------------------------------------------------------------------------------------------------------------------------------------------------------------------------------------------------------------------------------------------------------------------------------------------------------------------------------------------------------------------------|
| 22 | (yoga or tai ji or tai chi or qigong or qi-gong or pilates).ti,ab,kw.                                                                                                                                                                                                                                                                                                                                                                                                                                                                                                                                                                                                                                                                                                                                                                                      |
| 23 | ((mckenzie or mechanical or Alexander or William or Feldenkrais) adj2 (technique* or model* or tool* or exercise* or therapy)).ti,ab,kw.                                                                                                                                                                                                                                                                                                                                                                                                                                                                                                                                                                                                                                                                                                                   |
| 24 | (neuropsychiatry* or neuro-rehabilitati*).ti,ab,kw.                                                                                                                                                                                                                                                                                                                                                                                                                                                                                                                                                                                                                                                                                                                                                                                                        |
| 25 | ((non-pharma* or nonpharma* or non pharma* or non-drug or nondrug or non drug or non-surgical or nonsurgical or non surgical or non-surgery or nonsurgery or non surgery or non-invasive or noninvasive or non invasive or complimentary or integrat* or holistic or multi-modal* or multimodal* or Multidisciplinary or Multi-disciplinary or Interdisciplinary or Inter-disciplinary or complex or multimodal* or multi-modal* or cross-disciplinary or crossdisciplinary or multi-dimensional or multidimensional or biopsychosocial or bio-psycho-social or multi-facet* or multifacet* or comprehensive or multiple or addition* or physiotherapy or physical therap*) adj3 (therap* or treat* or intervention* or action* or program* or strateg* or protocol* or support* or approach* or evaluation or rehabilitation or care or session*)).ti,kw. |
| 26 | or/5-25                                                                                                                                                                                                                                                                                                                                                                                                                                                                                                                                                                                                                                                                                                                                                                                                                                                    |
| 27 | 4 and 26                                                                                                                                                                                                                                                                                                                                                                                                                                                                                                                                                                                                                                                                                                                                                                                                                                                   |
| 28 | limit 27 to (randomized controlled trial or controlled clinical trial)                                                                                                                                                                                                                                                                                                                                                                                                                                                                                                                                                                                                                                                                                                                                                                                     |
| 29 | ((random* or cluster-random* or quasi-random* or control?ed or crossover or cross-over or blind* or mask*) adj4 (trial*1 or study or studies or analy*)) or rct).ti,ab,kw.                                                                                                                                                                                                                                                                                                                                                                                                                                                                                                                                                                                                                                                                                 |
| 30 | (placebo* or single-blind* or double-blind* or triple-blind*).ti,ab,kw.                                                                                                                                                                                                                                                                                                                                                                                                                                                                                                                                                                                                                                                                                                                                                                                    |
| 31 | ((single or double or triple) adj2 (blind* or mask*)).ti,ab,kw.                                                                                                                                                                                                                                                                                                                                                                                                                                                                                                                                                                                                                                                                                                                                                                                            |
| 32 | ((patient* or person* or participant* or population* or allocate* or assign*) adj3 (random* or blind* or mask*)).ti,ab,kw.                                                                                                                                                                                                                                                                                                                                                                                                                                                                                                                                                                                                                                                                                                                                 |
| 33 | or/29-32                                                                                                                                                                                                                                                                                                                                                                                                                                                                                                                                                                                                                                                                                                                                                                                                                                                   |
| 34 | 27 and 33                                                                                                                                                                                                                                                                                                                                                                                                                                                                                                                                                                                                                                                                                                                                                                                                                                                  |
| 35 | 28 or 34                                                                                                                                                                                                                                                                                                                                                                                                                                                                                                                                                                                                                                                                                                                                                                                                                                                   |
| 36 | limit 35 to (yr="2004-2020" and (danish or english or norwegian or swedish))                                                                                                                                                                                                                                                                                                                                                                                                                                                                                                                                                                                                                                                                                                                                                                               |

## Cochrane Central

| ID  | Search                                                                                                                                                                                                                                                                                                                                                                                                                                  | Hits              |
|-----|-----------------------------------------------------------------------------------------------------------------------------------------------------------------------------------------------------------------------------------------------------------------------------------------------------------------------------------------------------------------------------------------------------------------------------------------|-------------------|
| #1  | MeSH descriptor: [Headache Disorders, Primary]                                                                                                                                                                                                                                                                                                                                                                                          | this term only    |
| #2  | MeSH descriptor: [Tension-Type Headache]                                                                                                                                                                                                                                                                                                                                                                                                | explode all trees |
| #3  | ((tension* or tension-type) NEAR/2 (headache* or head ache*))                                                                                                                                                                                                                                                                                                                                                                           | :ti,ab,kw         |
| #4  | #1 or #2 or #3                                                                                                                                                                                                                                                                                                                                                                                                                          |                   |
| #5  | MeSH descriptor: [Exercise Therapy]                                                                                                                                                                                                                                                                                                                                                                                                     | explode all trees |
| #6  | MeSH descriptor: [Exercise]                                                                                                                                                                                                                                                                                                                                                                                                             | explode all trees |
| #7  | MeSH descriptor: [Sports]                                                                                                                                                                                                                                                                                                                                                                                                               | explode all trees |
| #8  | MeSH descriptor: [Physical Therapy Modalities]                                                                                                                                                                                                                                                                                                                                                                                          | explode all trees |
| #9  | MeSH descriptor: [Physical Exertion]                                                                                                                                                                                                                                                                                                                                                                                                    | explode all trees |
| #10 | MeSH descriptor: [Muscle Strength]                                                                                                                                                                                                                                                                                                                                                                                                      | explode all trees |
| #11 | MeSH descriptor: [Exercise Movement Techniques]                                                                                                                                                                                                                                                                                                                                                                                         | explode all trees |
| #12 | MeSH descriptor: [Weight-Bearing]                                                                                                                                                                                                                                                                                                                                                                                                       | explode all trees |
| #13 | MeSH descriptor: [Tai Ji]                                                                                                                                                                                                                                                                                                                                                                                                               | explode all trees |
| #14 | MeSH descriptor: [Yoga]                                                                                                                                                                                                                                                                                                                                                                                                                 | explode all trees |
| #15 | (exercis* or train* or stepped care or physical therap* or physiotherap* or kinesiotherapy)                                                                                                                                                                                                                                                                                                                                             | :ti,kw            |
| #16 | (physical NEAR/1 (education or program*))                                                                                                                                                                                                                                                                                                                                                                                               | :ti,ab,kw         |
| #17 | (exercise NEAR/3 (session* or training or technique* or physical or isometric or therap* or program* or class*))                                                                                                                                                                                                                                                                                                                        | :ti,ab,kw         |
| #18 | ((muscl* or resistance or physical or endurance or strength* or balance or aquatic* or trunk or graded or gradual or progressive or incremented or symptom-based or symptombased or symptom based or guided or supervis* or stepped care or stepwise or step-wise) NEAR/3 (train* or retrain* or re-train* or exercise* or rehabilitation or strength* or fit* or condition* or exposure or activit* or exertion or load* or activit*)) | :ti,ab,kw         |
| #19 | (aerobic* or anaerobic* or movement therapy or watergym* or water gym* or aquagym or gym* or (warm water NEAR/4 (exercis* or train* or rehab*)))                                                                                                                                                                                                                                                                                        | :ti,ab,kw         |
| #20 | (running or Skate* or skating or skiing or Jog* or zumba or kettlebelt or Swim* or Bicycl* or cycling or bicycling or fitness bike* or exercise bike* or spinning or walk* or rowing or rower or water-rower* or waterrower* or cross-train* or crosstrain* or pacing or paced or titreted or (weight* NEAR/3 (lift* or train* or exercis*)))                                                                                           | :ti,ab,kw         |
| #21 | (yoga or tai ji or tai chi or qigong or qi-gong or pilates)                                                                                                                                                                                                                                                                                                                                                                             | :ti,ab,kw         |
| #22 | ((mckenzie or mechanical or Alexander or William or Feldenkrais) NEAR/2 (technique* or model* or tool* or exercise* or therapy))                                                                                                                                                                                                                                                                                                        | :ti,ab,kw         |
| #23 | #5 or #6 or #7 or #8 or #9 or #10 or #11 #12 or #13 or #14 or #15 or #16 or #17 or #18 or #19 or #20 or #21 or #22                                                                                                                                                                                                                                                                                                                      |                   |
| #24 | #4 AND #23 with Publication Year from 2004 to 2020, in Trials                                                                                                                                                                                                                                                                                                                                                                           |                   |

---



## Cinahl

| #   | Query                                                                                                                                                                                                                                                                                                                                                                                                                                                                                                                                                                                                                                                                                                                                                                                                                               | Limiters/Expanders                                                                          |
|-----|-------------------------------------------------------------------------------------------------------------------------------------------------------------------------------------------------------------------------------------------------------------------------------------------------------------------------------------------------------------------------------------------------------------------------------------------------------------------------------------------------------------------------------------------------------------------------------------------------------------------------------------------------------------------------------------------------------------------------------------------------------------------------------------------------------------------------------------|---------------------------------------------------------------------------------------------|
| S22 | S16 AND S21                                                                                                                                                                                                                                                                                                                                                                                                                                                                                                                                                                                                                                                                                                                                                                                                                         | Limiters - Published Date: 20040101-20200731; Language: Danish, English, Norwegian, Swedish |
| S21 | S17 OR S18 OR S19 OR S20                                                                                                                                                                                                                                                                                                                                                                                                                                                                                                                                                                                                                                                                                                                                                                                                            |                                                                                             |
| S20 | ((patient* or person* or participant* or population* or allocate* or assign*) N3 (random* or blind* or mask*))                                                                                                                                                                                                                                                                                                                                                                                                                                                                                                                                                                                                                                                                                                                      |                                                                                             |
| S19 | (placebo* or single-blind* or double-blind* or triple-blind* or ((single or double or triple) N1 (blind* or mask*))                                                                                                                                                                                                                                                                                                                                                                                                                                                                                                                                                                                                                                                                                                                 |                                                                                             |
| S18 | ((random* or cluster-random* or quasi-random* or control#ed or crossover or cross-over or blind* or mask*) N4 (trial* or study or studies or analy*)) or rct)                                                                                                                                                                                                                                                                                                                                                                                                                                                                                                                                                                                                                                                                       |                                                                                             |
| S17 | PT Randomized Controlled Trial                                                                                                                                                                                                                                                                                                                                                                                                                                                                                                                                                                                                                                                                                                                                                                                                      |                                                                                             |
| S16 | S4 AND S15                                                                                                                                                                                                                                                                                                                                                                                                                                                                                                                                                                                                                                                                                                                                                                                                                          |                                                                                             |
| S15 | S5 OR S6 OR S7 OR S8 OR S9 OR S10 OR S11 OR S12 OR S13 OR S14                                                                                                                                                                                                                                                                                                                                                                                                                                                                                                                                                                                                                                                                                                                                                                       |                                                                                             |
| S14 | ((non-pharma* or nonpharma* or non pharma* or non-drug or nondrug or non drug or non-surgical or nonsurgical or non surgical or non-surgery or nonsurgery or non surgery or non-invasive or noninvasive or non invasive or complimentary or integrat* or holistic or multi-modal* or multimodal* or Multidisciplinary or Multi-disciplinary or Interdisciplinary or Inter-disciplinary or complex or multimodal* or multi-modal* or cross-disciplinary or crossdisciplinary or multi-dimensional or multidimensional or biopsychosocial or bio-psycho-social or multifacet* or multifacet* or comprehensive or multiple or physiotherapy or physical therap*) N3 (therap* or treat* or intervention* or action* or program* or strateg* or protocol* or support* or approach* or evaluation or rehabilitation or care or session*)) |                                                                                             |
| S13 | neurorehabilitati* or neuro-rehabilitati*                                                                                                                                                                                                                                                                                                                                                                                                                                                                                                                                                                                                                                                                                                                                                                                           |                                                                                             |

|     |                                                                                                                                                                                                                                                                                                                                                                                                                                                                                                                                                |  |
|-----|------------------------------------------------------------------------------------------------------------------------------------------------------------------------------------------------------------------------------------------------------------------------------------------------------------------------------------------------------------------------------------------------------------------------------------------------------------------------------------------------------------------------------------------------|--|
| S12 | (mckenzie or mechanical or Alexander or William or Feldenkrais) N2 (technique* or model* or tool* or exercise* or therapy)                                                                                                                                                                                                                                                                                                                                                                                                                     |  |
| S11 | (yoga or tai ji or tai chi or qigong or qi-gong or pilates*)                                                                                                                                                                                                                                                                                                                                                                                                                                                                                   |  |
| S10 | running or Skate* or skating or skiing or Jog* or zumba or kettlebelt or Swim* or Bicycl* or cycling or bicycling or fitness bike* or exercise bike* or spinning or walk* or rowing or rower or water-rower* or waterrower* or cross-train* or crosstrain* or pacing or paced or titreted or (weight* N3 (lift* or train* or exercis*))                                                                                                                                                                                                        |  |
| S9  | (active rehabilitation or aerobic* or anaerobic* or movement therapy or watergym* or water gym* or aquagym or gym* or hydrotherap* or pilates)                                                                                                                                                                                                                                                                                                                                                                                                 |  |
| S8  | (muscl* or resistance or physical or endurance or strength* or balance or postur* or gait or threshold* or treadmill* or aquatic* or trunk or graded or gradual or progressive or controlled or incremented or symptom-based or symptombased or symptom based or guided or supervis* or coached or coaching or stepped care or stepwise or step-wise) N3 (train* or retrain* or re-train* or exercise* or rehabilitation or strength* or fit* or condition* or exposure or activit* or exertion or load* or physical therap* or physiotherap*) |  |
| S7  | (physical N1 (education or program*)) or (exercise N3 (session* or training or technique* or physical or isometric or therap* or program* or class*))                                                                                                                                                                                                                                                                                                                                                                                          |  |
| S6  | TI (exercis* or train* or stepped care or physical therap* or physiotherap* or kinesiotherapy)                                                                                                                                                                                                                                                                                                                                                                                                                                                 |  |
| S5  | MH "Physical therapy" or MH "Exercise+" or MH "Exercise therapy+" or MH Sports+ or MH "Physical Exertion+" or MH "Muscle strength+" or MH "Exercise Movement Techniques+" or MH "physical therapy modalities+" or MH "Physical Education and Training+" or MH "Weight-Bearing" or MH "Ta ji+" OR MH "Yoga+"                                                                                                                                                                                                                                    |  |

|    |                                                            |  |
|----|------------------------------------------------------------|--|
| S4 | S1 OR S2 OR S3                                             |  |
| S3 | SU (tension* or tension-type) N2 (headache* or head ache*) |  |
| S2 | (tension* or tension-type) N2 (headache* or head ache*)    |  |
| S1 | MH "Headache, Primary" or MH "Tension Headache"            |  |

---

**PEDRO**

Abstract & Title: (tension-type headache\* or tension headache\*) and exercise

Method: Clinical trial

Published since: 2004

---

## Should patients with tension-type headache be offered psychological treatment?

Search date: 10.07.2020

### Medline

Database(s): **Ovid MEDLINE(R) and Epub Ahead of Print, In-Process & Other Non-Indexed Citations, Daily and Versions(R)** 1946 to July 08, 2020

Search Strategy:

| #  | Searches                                                                                                                                                                                                                                                                                  |
|----|-------------------------------------------------------------------------------------------------------------------------------------------------------------------------------------------------------------------------------------------------------------------------------------------|
| 1  | Headache/                                                                                                                                                                                                                                                                                 |
| 2  | Headache disorders/                                                                                                                                                                                                                                                                       |
| 3  | Headache Disorders, Primary/                                                                                                                                                                                                                                                              |
| 4  |                                                                                                                                                                                                                                                                                           |
| 5  | exp Tension-Type Headache/                                                                                                                                                                                                                                                                |
| 6  | (headache* or head ache* or migraine*).ti,bt,ab,kw,kf.                                                                                                                                                                                                                                    |
| 7  | or/1-6                                                                                                                                                                                                                                                                                    |
| 8  | exp Counseling/                                                                                                                                                                                                                                                                           |
| 9  | (psychoeducat* or psycho-educat*).ti,bt,ab,kw,kf.                                                                                                                                                                                                                                         |
| 10 | (self-management or self-instruction* or selfmanagement or selfinstruction* or self management or self instruction* or self-guid* or self guid* or selfguid* or self care or self-care or selfcare or guidance).ti,bt,ab,kw,kf.                                                           |
| 11 | exp Psychotherapy/                                                                                                                                                                                                                                                                        |
| 12 | exp Cognitive Behavioral Therapy/                                                                                                                                                                                                                                                         |
| 13 | exp Adaptation, Psychological/                                                                                                                                                                                                                                                            |
| 14 | Motivational Interviewing/                                                                                                                                                                                                                                                                |
| 15 | exp Mindfulness/                                                                                                                                                                                                                                                                          |
| 16 | Breathing Exercises/                                                                                                                                                                                                                                                                      |
| 17 | exp Biofeedback, Psychology/ or feedback/ or feedback, psychological/ or autogenic training/                                                                                                                                                                                              |
| 18 | Relaxation therapy/ or Muscle relaxation/                                                                                                                                                                                                                                                 |
| 19 | "Imagery (Psychotherapy)"/                                                                                                                                                                                                                                                                |
| 20 | (cbt or act or (acceptance adj2 therapy)).ti,bt,ab,kw,kf.                                                                                                                                                                                                                                 |
| 21 | (cognitive-behavior-therapy or cognitive-behavioral-therapy).ti,bt,ab,kw,kf.                                                                                                                                                                                                              |
| 22 | ((cognitive or cognitive-behavior* or behavior or individual or group or Schema* or asserti* or network or communit* or family or carer* or parent* or imagery or marital or spous* or Transference* or cognitive or behavior* or mentalization* or visualization or dynamic or crisis or |

|    |                                                                                                                                                                                                                                                                                                                                                                                                                                                                                                                                                                                                                                                                                             |
|----|---------------------------------------------------------------------------------------------------------------------------------------------------------------------------------------------------------------------------------------------------------------------------------------------------------------------------------------------------------------------------------------------------------------------------------------------------------------------------------------------------------------------------------------------------------------------------------------------------------------------------------------------------------------------------------------------|
|    | emotion* or psychodynamic* or Interpersonal or Conversational or psychiatric or Aversive or Biofeedback or neurofeedback or Desensiti#ation or Relaxation or Feedback or Gestalt or Hypnosis or Music or Narrative or Psychoanalytic or Psychotherapeutic or Association or Reality or Neurolinguistic Programming or NPL or mindful* or meditation or attention control or stress) adj3 (therap* or treatment* or intervention* or management* or model* or program* or modal* or treat* or interview* or training or rehabilitation or neuro-rehabilitation or neurorehabilitation or support* or counseling or counselling or remediation or session* or technique*).ti, bt, ab, kw, kf. |
| 23 | (psychotherap* or psycho-therap* or counsel?ing).ti, bt, ab, kw, kf.                                                                                                                                                                                                                                                                                                                                                                                                                                                                                                                                                                                                                        |
| 24 | ((psychologic* or neuro-psycholog* or neuropsycholog* or psychosocial or psycho-social) adj3 (therap* or treat* or intervention* or program* or plan* or approach* or action* or model* or modal* or multimodal* or multi-modal* or interview* or management or training or rehabilitation or neuro-rehabilitation or neurorehabilitation or support* or counseling or counselling or remediation or session* or coaching)).ti, bt, ab, kw, kf.                                                                                                                                                                                                                                             |
| 25 | ((controlled or paced or therap* or exercise*) adj2 breathing).ti, bt, ab, kw, kf.                                                                                                                                                                                                                                                                                                                                                                                                                                                                                                                                                                                                          |
| 26 | (respirat* adj2 (training or exercise* or therap*)).ti, bt, ab, kw, kf.                                                                                                                                                                                                                                                                                                                                                                                                                                                                                                                                                                                                                     |
| 27 | (guided adj2 (imagery or visuali*)).ti, bt, ab, kw, kf.                                                                                                                                                                                                                                                                                                                                                                                                                                                                                                                                                                                                                                     |
| 28 | (problem solving or coping behavio?r* or social coping or stress management or stress handling or adaptation or adaptive behavio?r* or motivational interviewing).ti, bt, ab, kw, kf.                                                                                                                                                                                                                                                                                                                                                                                                                                                                                                       |
| 29 | (counsel?ing or telecounsel?ing or tele-counsel?ing or internet-counsel?ing or webcounsel?ing or web-counsel?ing or videocounsel?ing or video-counsel?ing or coaching or telecoaching or tele-coaching or internet-coaching or webcoaching or web-coaching or video-coaching or video-coaching).ti, bt, ab, kf.                                                                                                                                                                                                                                                                                                                                                                             |
| 30 | empower*.ti, bt, ab, kw, kf.                                                                                                                                                                                                                                                                                                                                                                                                                                                                                                                                                                                                                                                                |
| 31 | or/8-30                                                                                                                                                                                                                                                                                                                                                                                                                                                                                                                                                                                                                                                                                     |
| 32 | 7 and 31                                                                                                                                                                                                                                                                                                                                                                                                                                                                                                                                                                                                                                                                                    |
| 33 | limit 32 to (randomized controlled trial or controlled clinical trial)                                                                                                                                                                                                                                                                                                                                                                                                                                                                                                                                                                                                                      |
| 34 | ((((random* or cluster-random* or quasi-random* or control?ed or crossover or cross-over or blind* or mask*) adj4 (trial*1 or study or studies or analy*)) or rct).ti, bt, ab, kf.                                                                                                                                                                                                                                                                                                                                                                                                                                                                                                          |
| 35 | (placebo* or single-blind* or double-blind* or triple-blind*).ti, ab, kf, hw.                                                                                                                                                                                                                                                                                                                                                                                                                                                                                                                                                                                                               |
| 36 | ((single or double or triple) adj2 (blind* or mask*)).ti, ab, kf, hw.                                                                                                                                                                                                                                                                                                                                                                                                                                                                                                                                                                                                                       |
| 37 | ((patient* or person* or participant* or population* or allocate* or assign*) adj3 (random* or blind* or mask*)).ti, ab, kf.                                                                                                                                                                                                                                                                                                                                                                                                                                                                                                                                                                |
| 38 | or/34-37                                                                                                                                                                                                                                                                                                                                                                                                                                                                                                                                                                                                                                                                                    |
| 39 | 32 and 38                                                                                                                                                                                                                                                                                                                                                                                                                                                                                                                                                                                                                                                                                   |
| 40 | 33 or 39                                                                                                                                                                                                                                                                                                                                                                                                                                                                                                                                                                                                                                                                                    |
| 41 | limit 40 to (yr="2017-2020" and (english or danish or norwegian or swedish))                                                                                                                                                                                                                                                                                                                                                                                                                                                                                                                                                                                                                |

## Embase

Database(s): **Embase** 1974 to 2020 July 09

Search Strategy:

| #  | Searches                                                                                                                                                                                                                                                                                                                                                                                                                                                                                                                                                                                                                                                                                                                                                                                                                                                                                                                                                        |
|----|-----------------------------------------------------------------------------------------------------------------------------------------------------------------------------------------------------------------------------------------------------------------------------------------------------------------------------------------------------------------------------------------------------------------------------------------------------------------------------------------------------------------------------------------------------------------------------------------------------------------------------------------------------------------------------------------------------------------------------------------------------------------------------------------------------------------------------------------------------------------------------------------------------------------------------------------------------------------|
| 1  |                                                                                                                                                                                                                                                                                                                                                                                                                                                                                                                                                                                                                                                                                                                                                                                                                                                                                                                                                                 |
| 2  | exp tension headache/                                                                                                                                                                                                                                                                                                                                                                                                                                                                                                                                                                                                                                                                                                                                                                                                                                                                                                                                           |
| 3  | exp chronic daily headache/                                                                                                                                                                                                                                                                                                                                                                                                                                                                                                                                                                                                                                                                                                                                                                                                                                                                                                                                     |
| 4  | primary headache/                                                                                                                                                                                                                                                                                                                                                                                                                                                                                                                                                                                                                                                                                                                                                                                                                                                                                                                                               |
| 5  | stabbing headache/                                                                                                                                                                                                                                                                                                                                                                                                                                                                                                                                                                                                                                                                                                                                                                                                                                                                                                                                              |
| 6  | (headache* or head ache* or migraine*).ti,ab,kw.                                                                                                                                                                                                                                                                                                                                                                                                                                                                                                                                                                                                                                                                                                                                                                                                                                                                                                                |
| 7  | or/1-6                                                                                                                                                                                                                                                                                                                                                                                                                                                                                                                                                                                                                                                                                                                                                                                                                                                                                                                                                          |
| 8  | exp Psychoeducation/                                                                                                                                                                                                                                                                                                                                                                                                                                                                                                                                                                                                                                                                                                                                                                                                                                                                                                                                            |
| 9  | counseling/ or e-counseling/ or motivational interviewing/                                                                                                                                                                                                                                                                                                                                                                                                                                                                                                                                                                                                                                                                                                                                                                                                                                                                                                      |
| 10 | (psychoeducat* or psycho-educat*).ti,ab,kw.                                                                                                                                                                                                                                                                                                                                                                                                                                                                                                                                                                                                                                                                                                                                                                                                                                                                                                                     |
| 11 | exp Psychotherapy/                                                                                                                                                                                                                                                                                                                                                                                                                                                                                                                                                                                                                                                                                                                                                                                                                                                                                                                                              |
| 12 | exp Cognitive Behavioral Therapy/                                                                                                                                                                                                                                                                                                                                                                                                                                                                                                                                                                                                                                                                                                                                                                                                                                                                                                                               |
| 13 | psychological aspect/                                                                                                                                                                                                                                                                                                                                                                                                                                                                                                                                                                                                                                                                                                                                                                                                                                                                                                                                           |
| 14 | social adaptation/                                                                                                                                                                                                                                                                                                                                                                                                                                                                                                                                                                                                                                                                                                                                                                                                                                                                                                                                              |
| 15 | exp biofeedback/                                                                                                                                                                                                                                                                                                                                                                                                                                                                                                                                                                                                                                                                                                                                                                                                                                                                                                                                                |
| 16 | exp relaxation training/                                                                                                                                                                                                                                                                                                                                                                                                                                                                                                                                                                                                                                                                                                                                                                                                                                                                                                                                        |
| 17 | exp mindfulness/                                                                                                                                                                                                                                                                                                                                                                                                                                                                                                                                                                                                                                                                                                                                                                                                                                                                                                                                                |
| 18 | (acceptance adj2 therapy).ti,ab,kw.                                                                                                                                                                                                                                                                                                                                                                                                                                                                                                                                                                                                                                                                                                                                                                                                                                                                                                                             |
| 19 | (cognitive-behavior-therapy or cognitive-behavioral-therapy).ti,ab,kw.                                                                                                                                                                                                                                                                                                                                                                                                                                                                                                                                                                                                                                                                                                                                                                                                                                                                                          |
| 20 | ((cognitive or cognitive-behavior* or individual or group or Schema* or asserti* or network or communit* or family or carer* or parent* or imagery or marital or spous* or Transference* or cognitive or behavior* or mentalization* or visualization or dynamic or crisis or emotion* or psychodynamic* or Interpersonal or Conversational or psychiatric or Aversive or Biofeedback or neurofeedback or Desensitization or Relaxation or Feedback or Gestalt or Hypnosis or Music or Narrative or Psychoanalytic or Psychotherapeutic or Association or Reality or Neurolinguistic Programming or NPL or mindful* or meditation or attention control or stress) adj3 (therap* or treatment* or intervention* or management* or model* or program* or modal* or treat* or interview* or training or rehabilitation or neuro-rehabilitation or neurorehabilitation or support* or counseling or counselling or remediation or session* or technique*).ti,ab,kw. |
| 21 | (psychotherap* or psycho-therap*).ti,ab,kw.                                                                                                                                                                                                                                                                                                                                                                                                                                                                                                                                                                                                                                                                                                                                                                                                                                                                                                                     |

|    |                                                                                                                                                                                                                                                                                                                                                                                                                                       |
|----|---------------------------------------------------------------------------------------------------------------------------------------------------------------------------------------------------------------------------------------------------------------------------------------------------------------------------------------------------------------------------------------------------------------------------------------|
| 22 | ((psychologic* or neuro-psycholog* or neuropsycholog* or psychosocial or psycho-social) adj3 (therap* or treat* or intervention* or program* or plan* or approach* or action* or model* or modal* or multimodal* or multi-modal* or interview* or management or training or rehabilitation or neuro-rehabilitation or neurorehabilitation or support* or counseling or counselling or remediation or session* or coaching)).ti,ab,kw. |
| 23 | ((controlled or paced or therap* or exercise*) adj2 breathing).ti,ab,kw.                                                                                                                                                                                                                                                                                                                                                              |
| 24 | (respirat* adj2 (training or exercise* or therap*)).ti,ab,kw.                                                                                                                                                                                                                                                                                                                                                                         |
| 25 | (guided adj2 (imagery or visuali*)).ti,ab,kw.                                                                                                                                                                                                                                                                                                                                                                                         |
| 26 | (problem solving or coping behavio?r* or social coping or stress management or stress handling or adaptation or adaptive behavio?r*).ti,ab,kw.                                                                                                                                                                                                                                                                                        |
| 27 | (counsel?ing or telecounsel?ing or tele-counsel?ing or internet-counsel?ing or webcounsel?ing or web-counsel?ing or videocounsel?ing or video-counsel?ing or coaching or telecoaching or tele-coaching or internet-coaching or webcoaching or web-coaching or video-coaching or video-coaching).ti,ab,kw.                                                                                                                             |
| 28 | empower*.ti,ab,kw.                                                                                                                                                                                                                                                                                                                                                                                                                    |
| 29 | or/8-28                                                                                                                                                                                                                                                                                                                                                                                                                               |
| 30 | 7 and 29                                                                                                                                                                                                                                                                                                                                                                                                                              |
| 31 | limit 30 to (randomized controlled trial or controlled clinical trial)                                                                                                                                                                                                                                                                                                                                                                |
| 32 | ((random* or cluster-random* or quasi-random* or control?ed or crossover or cross-over or blind* or mask*) adj3 (trial*1 or study or studies or analy*)) or rct).ti,ab,kw.                                                                                                                                                                                                                                                            |
| 33 | (placebo* or single-blind* or double-blind* or triple-blind*).ti,ab,kw.                                                                                                                                                                                                                                                                                                                                                               |
| 34 | ((single or double or triple) adj2 (blind* or mask*)).ti,ab,kw.                                                                                                                                                                                                                                                                                                                                                                       |
| 35 | ((patient* or person* or participant* or population* or allocate* or assign*) adj3 random*).ti,ab,kw.                                                                                                                                                                                                                                                                                                                                 |
| 36 | or/32-35                                                                                                                                                                                                                                                                                                                                                                                                                              |
| 37 | 30 and 36                                                                                                                                                                                                                                                                                                                                                                                                                             |
| 38 | 31 or 37                                                                                                                                                                                                                                                                                                                                                                                                                              |
| 39 | limit 38 to (yr="2017-2020" and (danish or english or norwegian or swedish))                                                                                                                                                                                                                                                                                                                                                          |

## PsycINFO

Database(s): **APA PsycInfo** 1806 to July Week 1 2020

Search Strategy:

| #  | Searches                                                                                                                                                                                                                                                                                                                                                                              |
|----|---------------------------------------------------------------------------------------------------------------------------------------------------------------------------------------------------------------------------------------------------------------------------------------------------------------------------------------------------------------------------------------|
| 1  | exp Headache/                                                                                                                                                                                                                                                                                                                                                                         |
| 2  | (headache* or head ache*).ti,ab,id.                                                                                                                                                                                                                                                                                                                                                   |
| 3  | or/1-2                                                                                                                                                                                                                                                                                                                                                                                |
| 4  | exp Psychoeducation/                                                                                                                                                                                                                                                                                                                                                                  |
| 5  | exp Counseling/                                                                                                                                                                                                                                                                                                                                                                       |
| 6  | (psychoeducat* or psycho-educat*).ti,ab,id.                                                                                                                                                                                                                                                                                                                                           |
| 7  | exp Psychotherapy/                                                                                                                                                                                                                                                                                                                                                                    |
| 8  | exp cognitive therapy/                                                                                                                                                                                                                                                                                                                                                                |
| 9  | exp Cognitive Techniques/                                                                                                                                                                                                                                                                                                                                                             |
| 10 | Therapeutic Camps/                                                                                                                                                                                                                                                                                                                                                                    |
| 11 | Psychological stress/                                                                                                                                                                                                                                                                                                                                                                 |
| 12 | Anxiety Management/                                                                                                                                                                                                                                                                                                                                                                   |
| 13 | exp Behavior Modification/                                                                                                                                                                                                                                                                                                                                                            |
| 14 | "Stress and Coping Measures"/                                                                                                                                                                                                                                                                                                                                                         |
| 15 | Problem Solving/ or Group Problem solving/                                                                                                                                                                                                                                                                                                                                            |
| 16 | psychosocial rehabilitation/                                                                                                                                                                                                                                                                                                                                                          |
| 17 | Biopsychosocial Approach/                                                                                                                                                                                                                                                                                                                                                             |
| 18 | Motivational Interviewing/                                                                                                                                                                                                                                                                                                                                                            |
| 19 | exp Reinforcement/                                                                                                                                                                                                                                                                                                                                                                    |
| 20 | exp Mindfulness/ or mindfulness-based interventions/                                                                                                                                                                                                                                                                                                                                  |
| 21 | exp Meditation/                                                                                                                                                                                                                                                                                                                                                                       |
| 22 | exp Biofeedback/ or feedback/                                                                                                                                                                                                                                                                                                                                                         |
| 23 | Relaxation therapy/ or Muscle relaxation/                                                                                                                                                                                                                                                                                                                                             |
| 24 | exp Imagery/                                                                                                                                                                                                                                                                                                                                                                          |
| 25 | Interdisciplinary Treatment Approach/ or Multimodal Treatment Approach/                                                                                                                                                                                                                                                                                                               |
| 26 | (cbt or act or (acceptance adj2 therapy)).ti,ab,id.                                                                                                                                                                                                                                                                                                                                   |
| 27 | (cognitive-behavior-therapy or cognitive-behavioral-therapy).ti,ab,id.                                                                                                                                                                                                                                                                                                                |
| 28 | ((cognitive or cognitive-behavior* or behavior or individual or group or Schema* or asserti* or network or communit* or family or carer* or parent* or imagery or marital or spous* or Transference* or cognitive or behavior* or mentali#ation* or visuali#ation or dynamic or cris#s or emotion* or psychodynamic* or Interpersonal or Conversational or psychiatric or Aversive or |



|    |                                                                                                                                                                                                                                                                                                                                                                                                                                                                                                                                                                                       |
|----|---------------------------------------------------------------------------------------------------------------------------------------------------------------------------------------------------------------------------------------------------------------------------------------------------------------------------------------------------------------------------------------------------------------------------------------------------------------------------------------------------------------------------------------------------------------------------------------|
|    | Biofeedback or neurofeedback or Desensitization or Relaxation or Feedback or Gestalt or Hypnosis or Music or Narrative or Psychoanalytic or Psychotherapeutic or Association or Reality or Neurolinguistic Programming or NPL or mindful* or meditation or attention control or stress) adj3 (therap* or treatment* or intervention* or management* or model* or program* or modal* or treat* or interview* or training or rehabilitation or neuro-rehabilitation or neurorehabilitation or support* or counseling or counselling or remediation or session* or technique*).ti,ab,id. |
| 29 | (psychotherap* or psycho-therap* or counsel?ing).ti,ab,id.                                                                                                                                                                                                                                                                                                                                                                                                                                                                                                                            |
| 30 | ((psychologic* or neuro-psycholog* or neuropsycholog* or psychosocial or psycho-social) adj3 (therap* or treat* or intervention* or program* or plan* or approach* or action* or model* or modal* or multimodal* or multi-modal* or interview* or management or training or rehabilitation or neuro-rehabilitation or neurorehabilitation or support* or counseling or counselling or remediation or session* or coaching)).ti,ab,id.                                                                                                                                                 |
| 31 | ((controlled or paced or therap* or exercise*) adj2 breathing).ti,ab,id.                                                                                                                                                                                                                                                                                                                                                                                                                                                                                                              |
| 32 | (respirat* adj2 (training or exercise* or therap*)).ti,ab,id.                                                                                                                                                                                                                                                                                                                                                                                                                                                                                                                         |
| 33 | ((guided adj2 (imagery or visuali*)) or mindful eating or mindful walking).ti,ab,id.                                                                                                                                                                                                                                                                                                                                                                                                                                                                                                  |
| 34 | (problem solving or coping behavio?r* or social coping or stress management or stress handling or adaptation or adaptive behavio?r* or motivational interviewing).ti,ab,id.                                                                                                                                                                                                                                                                                                                                                                                                           |
| 35 | (counsel?ing or telecounsel?ing or tele-counsel?ing or internet-counsel?ing or webcounsel?ing or web-counsel?ing or videocounsel?ing or video-counsel?ing or coaching or telecoaching or tele-coaching or internet-coaching or webcoaching or web-coaching or video coaching or video-coaching).ti,ab,id.                                                                                                                                                                                                                                                                             |
| 36 | (empower* or neuro-rehabilitati* or neurorehabilitati* or ((lifestyle or life-style or life style) adj1 (modification* or change*))).ti,ab,id.                                                                                                                                                                                                                                                                                                                                                                                                                                        |
| 37 | or/4-36                                                                                                                                                                                                                                                                                                                                                                                                                                                                                                                                                                               |
| 38 | 3 and 37                                                                                                                                                                                                                                                                                                                                                                                                                                                                                                                                                                              |
| 39 | ((((random* or cluster-random* or quasi-random* or control?ed or crossover or cross-over or blind* or mask*) adj4 (trial*1 or study or studies or analy*)) or rct).ti,ab,id.                                                                                                                                                                                                                                                                                                                                                                                                          |
| 40 | (placebo* or single-blind* or double-blind* or triple-blind* or ((single or double or triple) adj2 (blind* or mask*))).ti,ab,id.                                                                                                                                                                                                                                                                                                                                                                                                                                                      |
| 41 | ((patient* or person* or participant* or population* or allocate* or assign*) adj3 (random* or blind* or mask*)).ti,ab,id.                                                                                                                                                                                                                                                                                                                                                                                                                                                            |
| 42 | or/39-41                                                                                                                                                                                                                                                                                                                                                                                                                                                                                                                                                                              |
| 43 | 38 and 42                                                                                                                                                                                                                                                                                                                                                                                                                                                                                                                                                                             |
| 44 | limit 43 to (yr="2017-2020" and (english or danish or norwegian or swedish))                                                                                                                                                                                                                                                                                                                                                                                                                                                                                                          |

## Cochrane Central

| ID  | Search                                                                                                                                                                                                                                                                                                                                                                                                                                                                                                                                                                                                                                                                                                                                                                                                                                                                                 | Hits |
|-----|----------------------------------------------------------------------------------------------------------------------------------------------------------------------------------------------------------------------------------------------------------------------------------------------------------------------------------------------------------------------------------------------------------------------------------------------------------------------------------------------------------------------------------------------------------------------------------------------------------------------------------------------------------------------------------------------------------------------------------------------------------------------------------------------------------------------------------------------------------------------------------------|------|
| #1  | MeSH descriptor: [Headache] this term only                                                                                                                                                                                                                                                                                                                                                                                                                                                                                                                                                                                                                                                                                                                                                                                                                                             |      |
| #2  | MeSH descriptor: [Headache Disorders] this term only                                                                                                                                                                                                                                                                                                                                                                                                                                                                                                                                                                                                                                                                                                                                                                                                                                   |      |
| #3  | MeSH descriptor: [Headache Disorders, Primary] this term only                                                                                                                                                                                                                                                                                                                                                                                                                                                                                                                                                                                                                                                                                                                                                                                                                          |      |
| #4  |                                                                                                                                                                                                                                                                                                                                                                                                                                                                                                                                                                                                                                                                                                                                                                                                                                                                                        |      |
| #5  | MeSH descriptor: [Tension-Type Headache] explode all trees                                                                                                                                                                                                                                                                                                                                                                                                                                                                                                                                                                                                                                                                                                                                                                                                                             |      |
| #6  | (headache* or head ache*):ti,kw                                                                                                                                                                                                                                                                                                                                                                                                                                                                                                                                                                                                                                                                                                                                                                                                                                                        |      |
| #7  | #1 or #2 or #3 or #4 or #5 or #6                                                                                                                                                                                                                                                                                                                                                                                                                                                                                                                                                                                                                                                                                                                                                                                                                                                       |      |
| #8  | MeSH descriptor: [Counseling] explode all trees                                                                                                                                                                                                                                                                                                                                                                                                                                                                                                                                                                                                                                                                                                                                                                                                                                        |      |
| #9  | (psychoeducat* or psycho-educat*):ti,ab,kw                                                                                                                                                                                                                                                                                                                                                                                                                                                                                                                                                                                                                                                                                                                                                                                                                                             |      |
| #10 | MeSH descriptor: [Psychotherapy] explode all trees                                                                                                                                                                                                                                                                                                                                                                                                                                                                                                                                                                                                                                                                                                                                                                                                                                     |      |
| #11 | MeSH descriptor: [Mindfulness] explode all trees                                                                                                                                                                                                                                                                                                                                                                                                                                                                                                                                                                                                                                                                                                                                                                                                                                       |      |
| #12 | MeSH descriptor: [Cognitive Behavioral Therapy] explode all trees                                                                                                                                                                                                                                                                                                                                                                                                                                                                                                                                                                                                                                                                                                                                                                                                                      |      |
| #13 | MeSH descriptor: [Motivational Interviewing] explode all trees                                                                                                                                                                                                                                                                                                                                                                                                                                                                                                                                                                                                                                                                                                                                                                                                                         |      |
| #14 | MeSH descriptor: [Adaptation, Psychological] explode all trees                                                                                                                                                                                                                                                                                                                                                                                                                                                                                                                                                                                                                                                                                                                                                                                                                         |      |
| #15 | MeSH descriptor: [Breathing Exercises] this term only                                                                                                                                                                                                                                                                                                                                                                                                                                                                                                                                                                                                                                                                                                                                                                                                                                  |      |
| #16 | MeSH descriptor: [Biofeedback, Psychology] explode all trees                                                                                                                                                                                                                                                                                                                                                                                                                                                                                                                                                                                                                                                                                                                                                                                                                           |      |
| #17 | MeSH descriptor: [Relaxation Therapy] explode all trees                                                                                                                                                                                                                                                                                                                                                                                                                                                                                                                                                                                                                                                                                                                                                                                                                                |      |
| #18 | MeSH descriptor: [Imagery, Psychotherapy] this term only                                                                                                                                                                                                                                                                                                                                                                                                                                                                                                                                                                                                                                                                                                                                                                                                                               |      |
| #19 | (cbt or (acceptance NEAR/2 therapy)):ti,ab,kw                                                                                                                                                                                                                                                                                                                                                                                                                                                                                                                                                                                                                                                                                                                                                                                                                                          |      |
| #20 | (cognitive-behavior-therapy or cognitive-behavioral-therapy):ti,ab,kw                                                                                                                                                                                                                                                                                                                                                                                                                                                                                                                                                                                                                                                                                                                                                                                                                  |      |
| #21 | ((cognitive or cognitive-behavior* or cognitive-behavior* individual or Schema* or asserti* or network or communit* or family or imagery or marital or spous* or Transference* or cognitive or behavior* or mentali?ation* or dynamic or crisis or emotion* or problem solving or problem-solving or psychodynamic* or Interpersonal or Conversational or psychiatric or Aversive or Biofeedback or Desensiti?ation or Relaxation or Feedback or Gestalt or Hypnosis or Music or Narrative or Psychoanalytic or Psychotherapeutic or Association or Reality or Neurolinguistic Programming or NPL or mindful* or meditation) NEAR/3 (therap* or treatment* or intervention* or management* or model* or program* or treat* or training or rehabilitation or neuro-rehabilitation or neurorehabilitation or counseling or counselling or remediation or session* or coaching)):ti,ab,kw |      |
| #22 | (psychotherap* or psycho-therap*):ti,ab,kw                                                                                                                                                                                                                                                                                                                                                                                                                                                                                                                                                                                                                                                                                                                                                                                                                                             |      |
| #23 | ((Psychosocial or psycho-social or psychologic* or neuro-psycholog* or neuropsycholog*) NEAR/3 (therap* or treatment* or intervention* or management* or model* or program* or treat* or training or rehabilitation or neuro-rehabilitation or neurorehabilitation or support* or counseling or counselling or remediation or session* or coaching )):ti,ab,kw                                                                                                                                                                                                                                                                                                                                                                                                                                                                                                                         |      |
| #24 | ((controlled or paced or therap* or exercise*) NEAR/2 breathing):ti,ab,kw                                                                                                                                                                                                                                                                                                                                                                                                                                                                                                                                                                                                                                                                                                                                                                                                              |      |
| #25 | (respirat* NEAR/2 (training or exercise* or therap*)):ti,ab,kw                                                                                                                                                                                                                                                                                                                                                                                                                                                                                                                                                                                                                                                                                                                                                                                                                         |      |
| #26 | (guided NEAR/2 (imagery or visuali*)):ti,ab,kw                                                                                                                                                                                                                                                                                                                                                                                                                                                                                                                                                                                                                                                                                                                                                                                                                                         |      |
| #27 | (problem solving or coping behavior* or coping behaviour or social coping or stress management or stress handling or adaptation or adaptive behavior* or adaptive behaviour* or motivational interviewing):ti,ab,kw                                                                                                                                                                                                                                                                                                                                                                                                                                                                                                                                                                                                                                                                    |      |
| #28 | empower*:ti,ab,kw                                                                                                                                                                                                                                                                                                                                                                                                                                                                                                                                                                                                                                                                                                                                                                                                                                                                      |      |

- #29 (counsel?ing or telecounsel?ing or tele-counsel?ing or internet-counsel?ing or webcounsel?ing or web-counsel?ing or videocounsel?ing or video-counsel?ing or coaching or telecoaching or tele-coaching or internet-coaching or webcoaching or web-coaching or videocoaching or video-coaching):ti,ab,kw
- #30 #8 or #9 or #10 or #11 or #12 or #13 or #14 or #15 or #16 or #17 or #18 or #19 or #20 or #21 or #22 or #23 or #24 or #25 or #26 or #27 or #28 or #29
- #31 #7 AND #30 with Publication Year from 2017 to 2020, in Trials

## Cinahl

| #   | Query                                                                                                                                                             | Limiters/Expanders                                                                          |
|-----|-------------------------------------------------------------------------------------------------------------------------------------------------------------------|---------------------------------------------------------------------------------------------|
| S34 | S28 AND S33                                                                                                                                                       | Limiters - Published Date: 20170101-20200731; Language: Danish, English, Norwegian, Swedish |
| S33 | S29 OR S30 OR S31 OR S32                                                                                                                                          |                                                                                             |
| S32 | ((patient* or person* or participant* or population* or allocate* or assign*) N3 (random* or blind* or mask*))                                                    |                                                                                             |
| S31 | (placebo* or single-blind* or double-blind* or triple-blind* or ((single or double or triple) N1 (blind* or mask*))                                               |                                                                                             |
| S30 | ((((random* or cluster-random* or quasi-random* or control#ed or crossover or cross-over or blind* or mask*) N4 (trial* or study or studies or analy*)) or rct)   |                                                                                             |
| S29 | PT Randomized Controlled Trial                                                                                                                                    |                                                                                             |
| S28 | S4 and S27                                                                                                                                                        |                                                                                             |
| S27 | S5 OR S6 OR S7 OR S8 OR S9 OR S10 OR S11 OR S12 OR S13 OR S14 OR S15 OR S16 OR S17 OR S18 OR S19 OR S20 OR S21 OR S22 OR S23 OR S24 OR S25 OR S26                 |                                                                                             |
| S26 | (empower*)                                                                                                                                                        |                                                                                             |
| S25 | (problem solving or coping behavio#r* or social coping or stress management or stress handling or adaptation or adaptive behavio#r* or motivational interviewing) |                                                                                             |
| S24 | (guided N2 (imagery or visuali*))                                                                                                                                 |                                                                                             |
| S23 | (respirat* N2 (training or exercise* or therap*))                                                                                                                 |                                                                                             |
| S22 | ((controlled or paced or therap* or exercise*) N2 breathing)                                                                                                      |                                                                                             |
| S21 | ((psychologic* or neuro-psycholog* or neuropsycholog* or psychosocial or psycho-social) N3 (therap* or treat* or                                                  |                                                                                             |

|     |                                                                                                                                                                                                                                                                                                                                                                                                                                                                                                                                                                                                                                                                                                                                                                                                                                                                                                                                                                  |  |
|-----|------------------------------------------------------------------------------------------------------------------------------------------------------------------------------------------------------------------------------------------------------------------------------------------------------------------------------------------------------------------------------------------------------------------------------------------------------------------------------------------------------------------------------------------------------------------------------------------------------------------------------------------------------------------------------------------------------------------------------------------------------------------------------------------------------------------------------------------------------------------------------------------------------------------------------------------------------------------|--|
|     | intervention* or program* or plan* or approach* or action* or model* or modal* or multimodal* or multi-modal* or interview* or management or training or rehabilitation or neuro-rehabilitation or neurorehabilitation or support* or counseling or counselling or remediation or session* or coaching))                                                                                                                                                                                                                                                                                                                                                                                                                                                                                                                                                                                                                                                         |  |
| S20 | (psychotherap* or psycho-therap* or counsel#ing)                                                                                                                                                                                                                                                                                                                                                                                                                                                                                                                                                                                                                                                                                                                                                                                                                                                                                                                 |  |
| S19 | ((cognitive or cognitive-behavior* or behavior or individual or group or Schema* or asserti* or network or communit* or family or carer* or parent* or imagery or marital or spous* or Transference* or cognitive or behavior* or mentali?ation* or visuali?ation or dynamic or cris?s or emotion* or psychodynamic* or Interpersonal or Conversational or psychiatric or Aversive or Biofeedback or neurofeedback or Desensiti?ation or Relaxation or Feedback or Gestalt or Hypnosis or Music or Narrative or Psychoanalytic or Psychotherapeutic or Association or Reality or Neurolinguistic Programming or NPL or mindful* or meditation or attention control or stress) N3 (therap* or treatment* or intervention* or management* or model* or program* or modal* or treat* or interview* or training or rehabilitation or neuro-rehabilitation or neurorehabilitation or support* or counseling or counselling or remediation or session* or technique*)) |  |
| S18 | (cognitive-behavior-therapy or cognitive-behavioral-therapy)                                                                                                                                                                                                                                                                                                                                                                                                                                                                                                                                                                                                                                                                                                                                                                                                                                                                                                     |  |
| S17 | (cbt or act or (acceptance adj2 therapy))                                                                                                                                                                                                                                                                                                                                                                                                                                                                                                                                                                                                                                                                                                                                                                                                                                                                                                                        |  |
| S16 | (MH "Guided Imagery")                                                                                                                                                                                                                                                                                                                                                                                                                                                                                                                                                                                                                                                                                                                                                                                                                                                                                                                                            |  |
| S15 | (MH "Biofeedback")                                                                                                                                                                                                                                                                                                                                                                                                                                                                                                                                                                                                                                                                                                                                                                                                                                                                                                                                               |  |
| S14 | (MH "Breathing Exercises+")                                                                                                                                                                                                                                                                                                                                                                                                                                                                                                                                                                                                                                                                                                                                                                                                                                                                                                                                      |  |
| S13 | (MH "Adaptation, Psychological+")                                                                                                                                                                                                                                                                                                                                                                                                                                                                                                                                                                                                                                                                                                                                                                                                                                                                                                                                |  |
| S12 | (MH "Cognitive Therapy+")                                                                                                                                                                                                                                                                                                                                                                                                                                                                                                                                                                                                                                                                                                                                                                                                                                                                                                                                        |  |
| S11 | MH Neuropsychology                                                                                                                                                                                                                                                                                                                                                                                                                                                                                                                                                                                                                                                                                                                                                                                                                                                                                                                                               |  |
| S10 | (MH "Support, Psychosocial+") OR (MH "Socioenvironmental Therapy+" or MH "Recreational therapy") or (MH "Rehabilitation, Psychosocial+")                                                                                                                                                                                                                                                                                                                                                                                                                                                                                                                                                                                                                                                                                                                                                                                                                         |  |
| S9  | MH (Psychotherapy+ or Mindfulness+ or Counseling+ or "Relaxation Techniques")                                                                                                                                                                                                                                                                                                                                                                                                                                                                                                                                                                                                                                                                                                                                                                                                                                                                                    |  |
| S8  | (counsel#ing or telecounsel#ing or tele-counsel#ing or internet-counsel#ing or webcounsel#ing or web-counsel#ing or videocounsel#ing or video-counsel#ing or coaching or telecoaching or tele-coaching or internet-coaching or                                                                                                                                                                                                                                                                                                                                                                                                                                                                                                                                                                                                                                                                                                                                   |  |

|    |                                                                                                                 |  |
|----|-----------------------------------------------------------------------------------------------------------------|--|
|    | webcoaching or web-coaching or video coaching or video-coaching)                                                |  |
| S7 | (MH "Psychoeducation")                                                                                          |  |
| S6 | (psychoeducat* or psycho-educat*)                                                                               |  |
| S5 | (MH "Counseling") OR (MH "Anticipatory Guidance") OR (MH "Motivational Interviewing") OR (MH "Peer Counseling") |  |
| S4 | S1 OR S2 OR S3                                                                                                  |  |
| S3 | SU (headache* or head ache*)                                                                                    |  |
| S2 | (headache* or head ache*)                                                                                       |  |
| S1 | MH "Headache" or MH "Headache, Primary"                                                                         |  |

### **PEDRO**

Abstract & Title: headache\*

Method: Clinical trial

Published since: 2017

### **OT Seeker**

Any Field: headache or migraine\*

Method: Randomized Controlled Trial

Year published: 2017-2020

## Should patients with tension-type headache be offered acupuncture?

Search date: 19.05.2020

### Medline

Søgt 13.07.2020

Database(s): **Ovid MEDLINE(R) and Epub Ahead of Print, In-Process & Other Non-Indexed Citations, Daily and Versions(R)** 1946 to July 10, 2020

Search Strategy:

| #  | Searches                                                                                                                                                                      |
|----|-------------------------------------------------------------------------------------------------------------------------------------------------------------------------------|
| 1  | Headache Disorders, Primary/                                                                                                                                                  |
| 2  | exp Tension-Type Headache/                                                                                                                                                    |
| 3  | ((tension* or tension-type) adj2 (headache* or head ache*)).ti,bt,ab,kw,kf.                                                                                                   |
| 4  | or/1-3                                                                                                                                                                        |
| 5  | exp Acupuncture therapy/                                                                                                                                                      |
| 6  | exp Acupuncture/                                                                                                                                                              |
| 7  | (mox#bustion or acupuncture* or acu-puncture* or needle* or needling or electroacupuncture or electro-acupuncture or acupressure).ti,bt,ab,kw,kf.                             |
| 8  | ((Trigger adj2 point*) or (auricul adj2 acupuncture) or (warm adj2 acupuncture) or (dry adj (needle* or needling))).ti,bt,ab,kw,kf.                                           |
| 9  | or/5-8                                                                                                                                                                        |
| 10 | 4 and 9                                                                                                                                                                       |
| 11 | limit 10 to (randomized controlled trial or controlled clinical trial)                                                                                                        |
| 12 | ((random* or cluster-random* or quasi-random* or control?ed or crossover or cross-over or blind* or mask*) adj4 (trial*1 or study or studies or analy*)) or rct).ti,bt,ab,kf. |
| 13 | (placebo* or single-blind* or double-blind* or triple-blind*).ti,bt,ab,kf.                                                                                                    |
| 14 | ((single or double or triple) adj2 (blind* or mask*)).ti,bt,ab,kf.                                                                                                            |
| 15 | ((patient* or person* or participant* or population* or allocate* or assign*) adj3 (random* or blind* or mask*)).tw.                                                          |
| 16 | or/12-15                                                                                                                                                                      |
| 17 | 10 and 16                                                                                                                                                                     |
| 18 | 11 or 17                                                                                                                                                                      |
| 19 | limit 18 to (yr="2016-2020" and (english or danish or norwegian or swedish))                                                                                                  |
| 20 | limit 19 to (systematic review or review or letter)                                                                                                                           |
| 21 | 19 not 20                                                                                                                                                                     |

## Embase

Database(s): **Embase** 1974 to 2020 July 10

Search Strategy:

| #  | Searches                                                                                                                                                                   |
|----|----------------------------------------------------------------------------------------------------------------------------------------------------------------------------|
| 1  | exp tension headache/                                                                                                                                                      |
| 2  | primary headache/                                                                                                                                                          |
| 3  | ((tension* or tension-type) adj2 (headache* or head ache*)).ti,ab,kw.                                                                                                      |
| 4  | or/1-3                                                                                                                                                                     |
| 5  | exp Acupuncture/                                                                                                                                                           |
| 6  | (mox#bustion or acupuncture* or acu-puncture* or needle* or needling or electroacupuncture or electro-acupuncture or acupressure).ti,ab,kw.                                |
| 7  | ((Trigger adj2 point*) or (auricul adj2 acupuncture) or (warm adj2 acupuncture) or (dry adj (needle* or needling))).ti,ab,kw.                                              |
| 8  | or/5-7                                                                                                                                                                     |
| 9  | 4 and 8                                                                                                                                                                    |
| 10 | limit 9 to (randomized controlled trial or controlled clinical trial)                                                                                                      |
| 11 | ((random* or cluster-random* or quasi-random* or control?ed or crossover or cross-over or blind* or mask*) adj4 (trial*1 or study or studies or analy*)) or rct).ti,ab,kw. |
| 12 | (placebo* or single-blind* or double-blind* or triple-blind*).ti,ab,kw.                                                                                                    |
| 13 | ((single or double or triple) adj2 (blind* or mask*)).ti,ab,kw.                                                                                                            |
| 14 | ((patient* or person* or participant* or population* or allocate* or assign*) adj3 (random* or blind* or mask*)).ti,ab,kw.                                                 |
| 15 | or/11-14                                                                                                                                                                   |
| 16 | 9 and 15                                                                                                                                                                   |
| 17 | 10 or 16                                                                                                                                                                   |
| 18 | limit 17 to (yr="2016-2020" and (danish or english or norwegian or swedish))                                                                                               |
| 19 | limit 18 to ("systematic review" or review or letter or note)                                                                                                              |
| 20 | 18 not 19                                                                                                                                                                  |

## Cochrane Central

| ID  | Search                                                                                                                            | Hits              |
|-----|-----------------------------------------------------------------------------------------------------------------------------------|-------------------|
| #1  | MeSH descriptor: [Headache Disorders, Primary]                                                                                    | this term only    |
| #2  | MeSH descriptor: [Tension-Type Headache]                                                                                          | explode all trees |
| #3  | ((tension* or tension-type) NEAR/2 (headache* or head ache*))                                                                     | ti,ab,kw          |
| #4  | #1 or #2 or #3                                                                                                                    |                   |
| #5  | MeSH descriptor: [Acupuncture Therapy]                                                                                            | explode all trees |
| #6  | MeSH descriptor: [Acupuncture]                                                                                                    | explode all trees |
| #7  | (mox*bustion or acupuncture* or acu-puncture* or needle* or needling or electroacupuncture or electro-acupuncture or acupressure) | ti,ab,kw          |
| #8  | ((Trigger NEAR/2 point*) or (auricul NEAR/2 acupuncture) or (warm NEAR/2 acupuncture) or (dry NEAR/1 (needle* or needling)))      |                   |
| #9  | #5 or #6 or #7 or #8                                                                                                              |                   |
| #10 | #4 AND #9 with Publication Year from 2016 to 2020, in Trials                                                                      |                   |

## Cinahl

| #   | Query                                                                                                                                                           | Limiters/Expanders                                                                          |
|-----|-----------------------------------------------------------------------------------------------------------------------------------------------------------------|---------------------------------------------------------------------------------------------|
| S17 | S11 AND S16                                                                                                                                                     | Limiters - Published Date: 20160101-20200731; Language: Danish, English, Norwegian, Swedish |
| S16 | S12 OR S13 OR S14 OR S15                                                                                                                                        |                                                                                             |
| S15 | ((patient* or person* or participant* or population* or allocat* or assign*) N3 (random* or blind* or mask*))                                                   |                                                                                             |
| S14 | (placebo* or single-blind* or double-blind* or triple-blind* or ((single or double or triple) N1 (blind* or mask*))                                             |                                                                                             |
| S13 | ((((random* or cluster-random* or quasi-random* or control#ed or crossover or cross-over or blind* or mask*) N4 (trial* or study or studies or analy*)) or rct) |                                                                                             |
| S12 | PT Randomized Controlled Trial                                                                                                                                  |                                                                                             |
| S11 | S4 AND S10                                                                                                                                                      |                                                                                             |
| S10 | S5 OR S6 OR S7 OR S8 OR S9                                                                                                                                      |                                                                                             |
| S9  | ((Trigger N2 point*) or (auricul N2 acupuncture) or (warm N2 acupuncture) or (dry N1 (needle* or needling)))                                                    |                                                                                             |
| S8  | (mox?bustion or acupuncture* or acu-puncture* or needle* or needling or electroacupuncture or electro-acupuncture or acupressure)                               |                                                                                             |



|    |                                                            |  |
|----|------------------------------------------------------------|--|
| S7 | MH "Dry needling"                                          |  |
| S6 | MH Acupressure                                             |  |
| S5 | MH "Acupuncture+"                                          |  |
| S4 | S1 OR S2 OR S3                                             |  |
| S3 | SU (tension* or tension-type) N2 (headache* or head ache*) |  |
| S2 | (tension* or tension-type) N2 (headache* or head ache*)    |  |
| S1 | MH "Headache, Primary" or MH "Tension headache"            |  |

---

## PEDRO

Abstract & Title: tension-type headache\* or tension headache\*

Therapy: Acupuncture

Method: Clinical trial

Published since: 2016

---

## Should patients with tension-type headache be offered patient education besides usual treatment?

Search date: 14.07.2020

### Medline

Database(s): **Ovid MEDLINE(R) and Epub Ahead of Print, In-Process & Other Non-Indexed Citations, Daily and Versions(R)** 1946 to July 10, 2020

Search Strategy:

| #  | Searches                                                                                                                                                                                                                                                                                                                                                                                                                                                                                                                                                                                                                                                                                                                                                                                                                                                                                                                    |
|----|-----------------------------------------------------------------------------------------------------------------------------------------------------------------------------------------------------------------------------------------------------------------------------------------------------------------------------------------------------------------------------------------------------------------------------------------------------------------------------------------------------------------------------------------------------------------------------------------------------------------------------------------------------------------------------------------------------------------------------------------------------------------------------------------------------------------------------------------------------------------------------------------------------------------------------|
| 1  | Headache/                                                                                                                                                                                                                                                                                                                                                                                                                                                                                                                                                                                                                                                                                                                                                                                                                                                                                                                   |
| 2  | Headache disorders/                                                                                                                                                                                                                                                                                                                                                                                                                                                                                                                                                                                                                                                                                                                                                                                                                                                                                                         |
| 3  | Headache Disorders, Primary/                                                                                                                                                                                                                                                                                                                                                                                                                                                                                                                                                                                                                                                                                                                                                                                                                                                                                                |
| 4  |                                                                                                                                                                                                                                                                                                                                                                                                                                                                                                                                                                                                                                                                                                                                                                                                                                                                                                                             |
| 5  | exp Tension-Type Headache/                                                                                                                                                                                                                                                                                                                                                                                                                                                                                                                                                                                                                                                                                                                                                                                                                                                                                                  |
| 6  | (headache* or head ache*).ti,bt,ab,kw,kf.                                                                                                                                                                                                                                                                                                                                                                                                                                                                                                                                                                                                                                                                                                                                                                                                                                                                                   |
| 7  | or/1-6                                                                                                                                                                                                                                                                                                                                                                                                                                                                                                                                                                                                                                                                                                                                                                                                                                                                                                                      |
| 8  | Health education/                                                                                                                                                                                                                                                                                                                                                                                                                                                                                                                                                                                                                                                                                                                                                                                                                                                                                                           |
| 9  | exp Patient Education as Topic/                                                                                                                                                                                                                                                                                                                                                                                                                                                                                                                                                                                                                                                                                                                                                                                                                                                                                             |
| 10 | exp Programmed Instruction as Topic/                                                                                                                                                                                                                                                                                                                                                                                                                                                                                                                                                                                                                                                                                                                                                                                                                                                                                        |
| 11 | Hotlines/                                                                                                                                                                                                                                                                                                                                                                                                                                                                                                                                                                                                                                                                                                                                                                                                                                                                                                                   |
| 12 | exp Counseling/                                                                                                                                                                                                                                                                                                                                                                                                                                                                                                                                                                                                                                                                                                                                                                                                                                                                                                             |
| 13 | (psychoeducat* or psycho-educat*).ti,bt,ab,kw,kf.                                                                                                                                                                                                                                                                                                                                                                                                                                                                                                                                                                                                                                                                                                                                                                                                                                                                           |
| 14 | ((information* or educat* or guid* or counsel?ing or school* or Course* or Coach* or instruction or class* or advic* or advis* or handout* or hand-out* or pamphlet* or leaflet* or booklet* or brochure* or website) adj3 (health or headache og migraine or treatment* or therapy or intervention or management or patient* or tailor* or individual* or Patient-centred or Patient-centered or Patient-oriented or Patient-focused or Patient-based or Patient-tailored or client-cent* or client cent* or client-focus* or client focus* or Client-oriented or Client-based or Client-tailored or person-centered or person-centred or person centered or person centred or person-focus* or person focus* or Person-oriented or Person-based or Person-tailored or Individual-centred or Individual-centered or Individual-focused or Individual-oriented or Individual-based or Individual-tailored)).ti,bt,ab,kw,kf. |
| 15 | (self-management or self-instruction* or selfmanagement or selfinstruction* or self management or self instruction* or self-guid* or self guid* or selfguid* or self care or self-care or selfcare or guidance).ti,bt,ab,kw,kf.                                                                                                                                                                                                                                                                                                                                                                                                                                                                                                                                                                                                                                                                                             |

|    |                                                                                                                                                                                                                                                                                                                                                                                                                                                                                                                                                                                                                                                                                                                                                                                                                                                                                                                                                                                                                                                                                                                               |
|----|-------------------------------------------------------------------------------------------------------------------------------------------------------------------------------------------------------------------------------------------------------------------------------------------------------------------------------------------------------------------------------------------------------------------------------------------------------------------------------------------------------------------------------------------------------------------------------------------------------------------------------------------------------------------------------------------------------------------------------------------------------------------------------------------------------------------------------------------------------------------------------------------------------------------------------------------------------------------------------------------------------------------------------------------------------------------------------------------------------------------------------|
| 16 | ((information* or instruction* or educat*) adj3 (material or advic* or advis* or handout* or hand-out* or pamphlet* or leaflet* or booklet* or brochure* or guid* or resource* or e-book*)).ti,bt,ab,kw,kf.                                                                                                                                                                                                                                                                                                                                                                                                                                                                                                                                                                                                                                                                                                                                                                                                                                                                                                                   |
| 17 | ((education* or learn* or training or teach*) adj2 (program* or patient* or consumer* or material* or resource* or aid*)).ti,bt,ab,kw,kf.                                                                                                                                                                                                                                                                                                                                                                                                                                                                                                                                                                                                                                                                                                                                                                                                                                                                                                                                                                                     |
| 18 | (patient adj (information or knowledge or website*)).ti,bt,ab,kw,kf.                                                                                                                                                                                                                                                                                                                                                                                                                                                                                                                                                                                                                                                                                                                                                                                                                                                                                                                                                                                                                                                          |
| 19 | (workshop* or seminar* or ((discussion or support) adj group*)).ti,bt,ab,kw,kf.                                                                                                                                                                                                                                                                                                                                                                                                                                                                                                                                                                                                                                                                                                                                                                                                                                                                                                                                                                                                                                               |
| 20 | (factsheet* or advice line* or advice-line* or hotline or help line* or help-line* or helpline*).ti,bt,ab,kw,kf.                                                                                                                                                                                                                                                                                                                                                                                                                                                                                                                                                                                                                                                                                                                                                                                                                                                                                                                                                                                                              |
| 21 | ((tele* or tele-based or tele-support* or telehealth or tele-health or telemedicine or tele-medicine or internet* or internet-based or internetbased or internet-delivered or internet-support* or internet-assisted or web or webbased or web-based or web based or web-support* or web-assisted or WWW or email* or e-mail or telephone or phone or computer* or computer-based or computerbased or computer-support* or computer-assisted or PC or PCs or PC-based or pc-support* or pc-assisted or skype or skype-based or skype-delivered or skype-assisted or app*1 or app-based or app based or app-assisted or smartphone* or ipad* or tablet* or IOS or android* or online* or on-line or mobile or ehealth or e-health or e-therap* or distance or remote or video-conferenc* or videoconference* or chatroom* or electronic or digital* or technology or technology-based or technology-delivered or technology-supported or technology-assisted or distance) adj3 (counsel* or support* or guide* or guidance or education or school* or course* or coach* or teach* or session* or information)).ti,bt,ab,kw,kf. |
| 22 | (tele-counsel?ing or tele-education or tele-instruction or tele-session* or tele-class* or tele-course* or tele-guid* or tele-coaching or internet-counsel?ing or internet-education or internet-instruction or internet-session* or internet-class* or internet-course* or internet-coaching or internet-guid* or web-counsel?ing or web-education or web-instruction or web-session* or web-class* or web-course* or web-coaching or web-guid* or e-counsel?ing).ti,bt,ab,kw,kf.                                                                                                                                                                                                                                                                                                                                                                                                                                                                                                                                                                                                                                            |
| 23 | or/8-22                                                                                                                                                                                                                                                                                                                                                                                                                                                                                                                                                                                                                                                                                                                                                                                                                                                                                                                                                                                                                                                                                                                       |
| 24 | 7 and 23                                                                                                                                                                                                                                                                                                                                                                                                                                                                                                                                                                                                                                                                                                                                                                                                                                                                                                                                                                                                                                                                                                                      |
| 25 | limit 24 to (randomized controlled trial or controlled clinical trial)                                                                                                                                                                                                                                                                                                                                                                                                                                                                                                                                                                                                                                                                                                                                                                                                                                                                                                                                                                                                                                                        |
| 26 | ((random* or cluster-random* or quasi-random* or control?ed or crossover or cross-over or blind* or mask*) adj4 (trial*1 or study or studies or analy*)) or rct).ti,bt,ab,kf.                                                                                                                                                                                                                                                                                                                                                                                                                                                                                                                                                                                                                                                                                                                                                                                                                                                                                                                                                 |
| 27 | (placebo* or single-blind* or double-blind* or triple-blind*).ti,ab,kf,hw.                                                                                                                                                                                                                                                                                                                                                                                                                                                                                                                                                                                                                                                                                                                                                                                                                                                                                                                                                                                                                                                    |
| 28 | ((single or double or triple) adj2 (blind* or mask*)).ti,ab,kf,hw.                                                                                                                                                                                                                                                                                                                                                                                                                                                                                                                                                                                                                                                                                                                                                                                                                                                                                                                                                                                                                                                            |
| 29 | ((patient* or person* or participant* or population* or allocate* or assign*) adj3 (random* or blind* or mask*)).ti,ab,kf.                                                                                                                                                                                                                                                                                                                                                                                                                                                                                                                                                                                                                                                                                                                                                                                                                                                                                                                                                                                                    |
| 30 | or/26-29                                                                                                                                                                                                                                                                                                                                                                                                                                                                                                                                                                                                                                                                                                                                                                                                                                                                                                                                                                                                                                                                                                                      |
| 31 | 24 and 30                                                                                                                                                                                                                                                                                                                                                                                                                                                                                                                                                                                                                                                                                                                                                                                                                                                                                                                                                                                                                                                                                                                     |

|    |                                                                              |
|----|------------------------------------------------------------------------------|
| 32 | 25 or 31                                                                     |
| 33 | limit 32 to (yr="2004-2020" and (english or danish or norwegian or swedish)) |

## Embase

Database(s): **Embase** 1974 to 2020 July 13

Search Strategy:

| #  | Searches                                                                                                                                                                                                                                                                                                                                                                                                                                                                                                                                                                                                                                                                                                                                                                                                                                                                                                              |
|----|-----------------------------------------------------------------------------------------------------------------------------------------------------------------------------------------------------------------------------------------------------------------------------------------------------------------------------------------------------------------------------------------------------------------------------------------------------------------------------------------------------------------------------------------------------------------------------------------------------------------------------------------------------------------------------------------------------------------------------------------------------------------------------------------------------------------------------------------------------------------------------------------------------------------------|
| 1  | Headache/                                                                                                                                                                                                                                                                                                                                                                                                                                                                                                                                                                                                                                                                                                                                                                                                                                                                                                             |
| 2  | "headache and facial pain"/                                                                                                                                                                                                                                                                                                                                                                                                                                                                                                                                                                                                                                                                                                                                                                                                                                                                                           |
| 3  |                                                                                                                                                                                                                                                                                                                                                                                                                                                                                                                                                                                                                                                                                                                                                                                                                                                                                                                       |
| 4  | exp tension headache/                                                                                                                                                                                                                                                                                                                                                                                                                                                                                                                                                                                                                                                                                                                                                                                                                                                                                                 |
| 5  | exp chronic daily headache/                                                                                                                                                                                                                                                                                                                                                                                                                                                                                                                                                                                                                                                                                                                                                                                                                                                                                           |
| 6  | primary headache/                                                                                                                                                                                                                                                                                                                                                                                                                                                                                                                                                                                                                                                                                                                                                                                                                                                                                                     |
| 7  | stabbing headache/                                                                                                                                                                                                                                                                                                                                                                                                                                                                                                                                                                                                                                                                                                                                                                                                                                                                                                    |
| 8  | (headache* or head ache*).ti,ab,kw.                                                                                                                                                                                                                                                                                                                                                                                                                                                                                                                                                                                                                                                                                                                                                                                                                                                                                   |
| 9  | or/1-8                                                                                                                                                                                                                                                                                                                                                                                                                                                                                                                                                                                                                                                                                                                                                                                                                                                                                                                |
| 10 | Health education/                                                                                                                                                                                                                                                                                                                                                                                                                                                                                                                                                                                                                                                                                                                                                                                                                                                                                                     |
| 11 | exp Patient Education/                                                                                                                                                                                                                                                                                                                                                                                                                                                                                                                                                                                                                                                                                                                                                                                                                                                                                                |
| 12 | exp Psychoeducation/                                                                                                                                                                                                                                                                                                                                                                                                                                                                                                                                                                                                                                                                                                                                                                                                                                                                                                  |
| 13 | hotline/                                                                                                                                                                                                                                                                                                                                                                                                                                                                                                                                                                                                                                                                                                                                                                                                                                                                                                              |
| 14 | counseling/ or anticipatory guidance/ or directive counseling/ or e-counseling/ or patient counseling/ or patient guidance/                                                                                                                                                                                                                                                                                                                                                                                                                                                                                                                                                                                                                                                                                                                                                                                           |
| 15 | (psychoeducat* or psycho-educat*).ti,ab,kw.                                                                                                                                                                                                                                                                                                                                                                                                                                                                                                                                                                                                                                                                                                                                                                                                                                                                           |
| 16 | ((information* or educat* or guid* or counsel?ing or school* or Course* or Coach* or instruction or class* or advic* or advis* or handout* or hand-out* or pamphlet* or leaflet* or booklet* or brochure* or website) adj3 (health or headache og migraine or treatment* or therapy or intervention or management or patient* or tailor* or individual* or Patient-centred or Patient-centered or Patient-oriented or Patient-focused or Patient-based or Patient-tailored or client-cent* or client cent* or client-focus* or client focus* or Client-oriented or Client-based or Client-tailored or person-centered or person-centred or person centered or person centred or person-focus* or person focus* or Person-oriented or Person-based or Person-tailored or Individual-centred or Individual-centered or Individual-focused or Individual-oriented or Individual-based or Individual-tailored)).ti,ab,kw. |
| 17 | (self-management or self-instruction* or selfmanagement or selfinstruction* or self management or self instruction* or self-guid* or self guid* or selfguid* or self care or self-care or selfcare).ti,ab,kw.                                                                                                                                                                                                                                                                                                                                                                                                                                                                                                                                                                                                                                                                                                         |

|    |                                                                                                                                                                                                                                                                                                                                                                                                                                                                                                                                                                                                                                                                                                                                                                                                                                                                                                                                                                                                                                                                                                                         |
|----|-------------------------------------------------------------------------------------------------------------------------------------------------------------------------------------------------------------------------------------------------------------------------------------------------------------------------------------------------------------------------------------------------------------------------------------------------------------------------------------------------------------------------------------------------------------------------------------------------------------------------------------------------------------------------------------------------------------------------------------------------------------------------------------------------------------------------------------------------------------------------------------------------------------------------------------------------------------------------------------------------------------------------------------------------------------------------------------------------------------------------|
| 18 | ((information* or instruction* or educat*) adj3 (material or advic* or advis* or handout* or hand-out* or pamphlet* or leaflet* or booklet* or brochure* or guid* or resource* or e-book*)).ti,ab,kw.                                                                                                                                                                                                                                                                                                                                                                                                                                                                                                                                                                                                                                                                                                                                                                                                                                                                                                                   |
| 19 | ((education* or learn* or training or teach*) adj2 (program* or patient* or consumer* or material* or resource* or aid or aids)).ti,ab,kw.                                                                                                                                                                                                                                                                                                                                                                                                                                                                                                                                                                                                                                                                                                                                                                                                                                                                                                                                                                              |
| 20 | (patient adj (information or knowledge or website*)).ti,ab,kw.                                                                                                                                                                                                                                                                                                                                                                                                                                                                                                                                                                                                                                                                                                                                                                                                                                                                                                                                                                                                                                                          |
| 21 | (workshop* or seminar* or ((discussion or support) adj group*)).ti,ab,kw.                                                                                                                                                                                                                                                                                                                                                                                                                                                                                                                                                                                                                                                                                                                                                                                                                                                                                                                                                                                                                                               |
| 22 | (factsheet* or advice line* or advice-line* or hotline or help line* or help-line* or helpline*).ti,ab,kw.                                                                                                                                                                                                                                                                                                                                                                                                                                                                                                                                                                                                                                                                                                                                                                                                                                                                                                                                                                                                              |
| 23 | ((tele* or tele-based or tele-support* or telehealth or tele-health or telemedicine or tele-medicine or internet* or internet-based or internetbased or internet-delivered or internet-support* or internet-assisted or web or webbased or web-based or web based or web-support* or web-assisted or WWW or email* or e-mail or telephone or phone or computer* or computer-based or computerbased or computer-support* or computer-assisted or PC or PCs or PC-based or pc-support* or pc-assisted or skype or skype-based or skype-delivered or skype-assisted or app*1 or app-based or app based or app-assisted or smartphone* or ipad* or tablet* or IOS or android* or online* or on-line or mobile or ehealth or e-health or e-therap* or distance or remote or video-conferenc* or videoconference* or chatroom* or electronic or digital* or technology or technology-based or technology-delivered or technology-supported or technology-assisted or distance) adj3 (counsel* or support* or guide* or guidance or education or school* or course* or coach* or teach* or session* or information)).ti,ab,kw. |
| 24 | (counsel?ing or tele-counsel?ing or tele-education or tele-instruction or tele-session* or tele-class* or tele-course* or tele-guid* or tele-coaching or internet-counsel?ing or internet-education or internet-instruction or internet-session* or internet-class* or internet-course* or internet-coaching or internet-guid* or web-counsel?ing or web-education or web-instruction or web-session* or web-class* or web-course* or web-coaching or web-guid* or e-counsel?ing).ti,ab,kw.                                                                                                                                                                                                                                                                                                                                                                                                                                                                                                                                                                                                                             |
| 25 | or/10-24                                                                                                                                                                                                                                                                                                                                                                                                                                                                                                                                                                                                                                                                                                                                                                                                                                                                                                                                                                                                                                                                                                                |
| 26 | 9 and 25                                                                                                                                                                                                                                                                                                                                                                                                                                                                                                                                                                                                                                                                                                                                                                                                                                                                                                                                                                                                                                                                                                                |
| 27 | limit 26 to (randomized controlled trial or controlled clinical trial)                                                                                                                                                                                                                                                                                                                                                                                                                                                                                                                                                                                                                                                                                                                                                                                                                                                                                                                                                                                                                                                  |
| 28 | ((random* or cluster-random* or quasi-random* or control?ed or crossover or cross-over or blind* or mask*) adj3 (trial*1 or study or studies or analy*)) or rct).ti,ab,kw.                                                                                                                                                                                                                                                                                                                                                                                                                                                                                                                                                                                                                                                                                                                                                                                                                                                                                                                                              |
| 29 | (placebo* or single-blind* or double-blind* or triple-blind*).ti,ab,kw.                                                                                                                                                                                                                                                                                                                                                                                                                                                                                                                                                                                                                                                                                                                                                                                                                                                                                                                                                                                                                                                 |
| 30 | ((single or double or triple) adj2 (blind* or mask*)).ti,ab,kw.                                                                                                                                                                                                                                                                                                                                                                                                                                                                                                                                                                                                                                                                                                                                                                                                                                                                                                                                                                                                                                                         |
| 31 | ((patient* or person* or participant* or population* or allocat* or assign*) adj3 random*).ti,ab,kw.                                                                                                                                                                                                                                                                                                                                                                                                                                                                                                                                                                                                                                                                                                                                                                                                                                                                                                                                                                                                                    |
| 32 | or/28-31                                                                                                                                                                                                                                                                                                                                                                                                                                                                                                                                                                                                                                                                                                                                                                                                                                                                                                                                                                                                                                                                                                                |
| 33 | 26 and 32                                                                                                                                                                                                                                                                                                                                                                                                                                                                                                                                                                                                                                                                                                                                                                                                                                                                                                                                                                                                                                                                                                               |
| 34 | 27 or 33                                                                                                                                                                                                                                                                                                                                                                                                                                                                                                                                                                                                                                                                                                                                                                                                                                                                                                                                                                                                                                                                                                                |
| 35 | limit 34 to (yr="2004-2020" and (danish or english or norwegian or swedish))                                                                                                                                                                                                                                                                                                                                                                                                                                                                                                                                                                                                                                                                                                                                                                                                                                                                                                                                                                                                                                            |

## PsycINFO

Database(s): **APA PsycInfo** 1806 to July Week 1 2020

Search Strategy:

| #  | Searches                                                                                                                                                                                                                                                                                                                                                                                                                                                                                                                                                                                                                                                                                                                                                                                                                                                                                                              |
|----|-----------------------------------------------------------------------------------------------------------------------------------------------------------------------------------------------------------------------------------------------------------------------------------------------------------------------------------------------------------------------------------------------------------------------------------------------------------------------------------------------------------------------------------------------------------------------------------------------------------------------------------------------------------------------------------------------------------------------------------------------------------------------------------------------------------------------------------------------------------------------------------------------------------------------|
| 1  | exp Headache/                                                                                                                                                                                                                                                                                                                                                                                                                                                                                                                                                                                                                                                                                                                                                                                                                                                                                                         |
| 2  | (headache* or head ache*).ti,ab,id.                                                                                                                                                                                                                                                                                                                                                                                                                                                                                                                                                                                                                                                                                                                                                                                                                                                                                   |
| 3  | or/1-2                                                                                                                                                                                                                                                                                                                                                                                                                                                                                                                                                                                                                                                                                                                                                                                                                                                                                                                |
| 4  | Health education/                                                                                                                                                                                                                                                                                                                                                                                                                                                                                                                                                                                                                                                                                                                                                                                                                                                                                                     |
| 5  | exp Client Education/                                                                                                                                                                                                                                                                                                                                                                                                                                                                                                                                                                                                                                                                                                                                                                                                                                                                                                 |
| 6  | exp Psychoeducation/                                                                                                                                                                                                                                                                                                                                                                                                                                                                                                                                                                                                                                                                                                                                                                                                                                                                                                  |
| 7  | Programmed Instruction/                                                                                                                                                                                                                                                                                                                                                                                                                                                                                                                                                                                                                                                                                                                                                                                                                                                                                               |
| 8  | Computer Assisted Instruction/                                                                                                                                                                                                                                                                                                                                                                                                                                                                                                                                                                                                                                                                                                                                                                                                                                                                                        |
| 9  | Individualized Instruction/                                                                                                                                                                                                                                                                                                                                                                                                                                                                                                                                                                                                                                                                                                                                                                                                                                                                                           |
| 10 | Distance Education/                                                                                                                                                                                                                                                                                                                                                                                                                                                                                                                                                                                                                                                                                                                                                                                                                                                                                                   |
| 11 | exp Educational Programs/                                                                                                                                                                                                                                                                                                                                                                                                                                                                                                                                                                                                                                                                                                                                                                                                                                                                                             |
| 12 | Hot Line Services/                                                                                                                                                                                                                                                                                                                                                                                                                                                                                                                                                                                                                                                                                                                                                                                                                                                                                                    |
| 13 | exp Counseling/                                                                                                                                                                                                                                                                                                                                                                                                                                                                                                                                                                                                                                                                                                                                                                                                                                                                                                       |
| 14 | exp Self-Help Techniques/                                                                                                                                                                                                                                                                                                                                                                                                                                                                                                                                                                                                                                                                                                                                                                                                                                                                                             |
| 15 | (psychoeducat* or psycho-educat*).ti,ab,id.                                                                                                                                                                                                                                                                                                                                                                                                                                                                                                                                                                                                                                                                                                                                                                                                                                                                           |
| 16 | ((information* or educat* or guid* or counsel?ing or school* or Course* or Coach* or instruction or class* or advic* or advis* or handout* or hand-out* or pamphlet* or leaflet* or booklet* or brochure* or website) adj3 (health or headache og migraine or treatment* or therapy or intervention or management or patient* or tailor* or individual* or Patient-centred or Patient-centered or Patient-oriented or Patient-focused or Patient-based or Patient-tailored or client-cent* or client cent* or client-focus* or client focus* or Client-oriented or Client-based or Client-tailored or person-centered or person-centred or person centered or person centred or person-focus* or person focus* or Person-oriented or Person-based or Person-tailored or Individual-centred or Individual-centered or Individual-focused or Individual-oriented or Individual-based or Individual-tailored)).ti,ab,id. |
| 17 | (self-management or self-instruction* or selfmanagement or selfinstruction* or self management or self instruction* or self-guid* or self guid* or selfguid* or self care or self-care or selfcare or guidance).ti,ab,id.                                                                                                                                                                                                                                                                                                                                                                                                                                                                                                                                                                                                                                                                                             |
| 18 | ((information* or instruction* or educat*) adj3 (material or advic* or advis* or handout* or hand-out* or pamphlet* or leaflet* or booklet* or brochure* or guid* or resource*)).ti,ab,id.                                                                                                                                                                                                                                                                                                                                                                                                                                                                                                                                                                                                                                                                                                                            |
| 19 | ((education* or learn* or training or teach*) adj2 (program* or patient* or consumer* or material* or resource* or aid*)).ti,ab,id.                                                                                                                                                                                                                                                                                                                                                                                                                                                                                                                                                                                                                                                                                                                                                                                   |

|    |                                                                                                                                                                                                                                                                                                                                                                                                                                                                                                                                                                                                                                                                                                                                                                                                                                                                                                                                                                                                                                                                                                                         |
|----|-------------------------------------------------------------------------------------------------------------------------------------------------------------------------------------------------------------------------------------------------------------------------------------------------------------------------------------------------------------------------------------------------------------------------------------------------------------------------------------------------------------------------------------------------------------------------------------------------------------------------------------------------------------------------------------------------------------------------------------------------------------------------------------------------------------------------------------------------------------------------------------------------------------------------------------------------------------------------------------------------------------------------------------------------------------------------------------------------------------------------|
| 20 | (patient adj (information or knowledge or website*)).ti,ab,id.                                                                                                                                                                                                                                                                                                                                                                                                                                                                                                                                                                                                                                                                                                                                                                                                                                                                                                                                                                                                                                                          |
| 21 | (workshop* or seminar* or ((discussion or support) adj group*)).ti,ab,id.                                                                                                                                                                                                                                                                                                                                                                                                                                                                                                                                                                                                                                                                                                                                                                                                                                                                                                                                                                                                                                               |
| 22 | (factsheet* or advice line* or advice-line* or hotline or help line* or help-line* or helpline*).ti,ab,id.                                                                                                                                                                                                                                                                                                                                                                                                                                                                                                                                                                                                                                                                                                                                                                                                                                                                                                                                                                                                              |
| 23 | ((tele* or tele-based or tele-support* or telehealth or tele-health or telemedicine or tele-medicine or internet* or internet-based or internetbased or internet-delivered or internet-support* or internet-assisted or web or webbased or web-based or web based or web-support* or web-assisted or WWW or email* or e-mail or telephone or phone or computer* or computer-based or computerbased or computer-support* or computer-assisted or PC or PCs or PC-based or pc-support* or pc-assisted or skype or skype-based or skype-delivered or skype-assisted or app*1 or app-based or app based or app-assisted or smartphone* or ipad* or tablet* or IOS or android* or online* or on-line or mobile or ehealth or e-health or e-therap* or distance or remote or video-conferenc* or videoconference* or chatroom* or electronic or digital* or technology or technology-based or technology-delivered or technology-supported or technology-assisted or distance) adj3 (counsel* or support* or guide* or guidance or education or school* or course* or coach* or teach* or session* or information)).ti,ab,id. |
| 24 | (tele-counsel?ing or tele-education or tele-instruction or tele-session* or tele-class* or tele-course* or tele-guid* or tele-coaching or internet-counsel?ing or internet-education or internet-instruction or internet-session* or internet-class* or internet-course* or internet-coaching or internet-guid* or web-counsel?ing or web-education or web-instruction or web-session* or web-class* or web-course* or web-coaching or web-guid* or e-counsel?ing).ti,ab,id.                                                                                                                                                                                                                                                                                                                                                                                                                                                                                                                                                                                                                                            |
| 25 | or/4-24                                                                                                                                                                                                                                                                                                                                                                                                                                                                                                                                                                                                                                                                                                                                                                                                                                                                                                                                                                                                                                                                                                                 |
| 26 | 3 and 25                                                                                                                                                                                                                                                                                                                                                                                                                                                                                                                                                                                                                                                                                                                                                                                                                                                                                                                                                                                                                                                                                                                |
| 27 | ((random* or cluster-random* or quasi-random* or control?ed or crossover or cross-over or blind* or mask*) adj4 (trial*1 or study or studies or analy*)) or rct).ti,ab,id.                                                                                                                                                                                                                                                                                                                                                                                                                                                                                                                                                                                                                                                                                                                                                                                                                                                                                                                                              |
| 28 | (placebo* or single-blind* or double-blind* or triple-blind* or ((single or double or triple) adj2 (blind* or mask*))).ti,ab,id.                                                                                                                                                                                                                                                                                                                                                                                                                                                                                                                                                                                                                                                                                                                                                                                                                                                                                                                                                                                        |
| 29 | ((patient* or person* or participant* or population* or allocate* or assign*) adj3 (random* or blind* or mask*)).ti,ab,id.                                                                                                                                                                                                                                                                                                                                                                                                                                                                                                                                                                                                                                                                                                                                                                                                                                                                                                                                                                                              |
| 30 | or/27-29                                                                                                                                                                                                                                                                                                                                                                                                                                                                                                                                                                                                                                                                                                                                                                                                                                                                                                                                                                                                                                                                                                                |
| 31 | 26 and 30                                                                                                                                                                                                                                                                                                                                                                                                                                                                                                                                                                                                                                                                                                                                                                                                                                                                                                                                                                                                                                                                                                               |
| 32 | limit 31 to (yr="2004-2020" and (english or danish or norwegian or swedish))                                                                                                                                                                                                                                                                                                                                                                                                                                                                                                                                                                                                                                                                                                                                                                                                                                                                                                                                                                                                                                            |

## Cochrane Central

| ID  | Search                                                                                                                                                                                                                                                                                                                                                                                                                                                                                                                                                                                                                                                                                                                                                                                                                                                                                                                                                                                                                                                                                                                      | Hits              |
|-----|-----------------------------------------------------------------------------------------------------------------------------------------------------------------------------------------------------------------------------------------------------------------------------------------------------------------------------------------------------------------------------------------------------------------------------------------------------------------------------------------------------------------------------------------------------------------------------------------------------------------------------------------------------------------------------------------------------------------------------------------------------------------------------------------------------------------------------------------------------------------------------------------------------------------------------------------------------------------------------------------------------------------------------------------------------------------------------------------------------------------------------|-------------------|
| #1  | MeSH descriptor: [Headache Disorders, Primary]                                                                                                                                                                                                                                                                                                                                                                                                                                                                                                                                                                                                                                                                                                                                                                                                                                                                                                                                                                                                                                                                              | this term only    |
| #2  | MeSH descriptor: [Headache]                                                                                                                                                                                                                                                                                                                                                                                                                                                                                                                                                                                                                                                                                                                                                                                                                                                                                                                                                                                                                                                                                                 | this term only    |
| #3  | MeSH descriptor: [Headache Disorders]                                                                                                                                                                                                                                                                                                                                                                                                                                                                                                                                                                                                                                                                                                                                                                                                                                                                                                                                                                                                                                                                                       | this term only    |
| #4  |                                                                                                                                                                                                                                                                                                                                                                                                                                                                                                                                                                                                                                                                                                                                                                                                                                                                                                                                                                                                                                                                                                                             |                   |
| #5  | MeSH descriptor: [Tension-Type Headache]                                                                                                                                                                                                                                                                                                                                                                                                                                                                                                                                                                                                                                                                                                                                                                                                                                                                                                                                                                                                                                                                                    | explode all trees |
| #6  | (headache* or head ache*):ti,kw                                                                                                                                                                                                                                                                                                                                                                                                                                                                                                                                                                                                                                                                                                                                                                                                                                                                                                                                                                                                                                                                                             |                   |
| #7  | #1 or #2 or #3 or #4 or #5 or #6                                                                                                                                                                                                                                                                                                                                                                                                                                                                                                                                                                                                                                                                                                                                                                                                                                                                                                                                                                                                                                                                                            |                   |
| #8  | MeSH descriptor: [Health Education]                                                                                                                                                                                                                                                                                                                                                                                                                                                                                                                                                                                                                                                                                                                                                                                                                                                                                                                                                                                                                                                                                         | this term only    |
| #9  | MeSH descriptor: [Patient Education as Topic]                                                                                                                                                                                                                                                                                                                                                                                                                                                                                                                                                                                                                                                                                                                                                                                                                                                                                                                                                                                                                                                                               | explode all trees |
| #10 | MeSH descriptor: [Programmed Instructions as Topic]                                                                                                                                                                                                                                                                                                                                                                                                                                                                                                                                                                                                                                                                                                                                                                                                                                                                                                                                                                                                                                                                         | explode all trees |
| #11 | MeSH descriptor: [Hotlines]                                                                                                                                                                                                                                                                                                                                                                                                                                                                                                                                                                                                                                                                                                                                                                                                                                                                                                                                                                                                                                                                                                 | explode all trees |
| #12 | MeSH descriptor: [Counseling]                                                                                                                                                                                                                                                                                                                                                                                                                                                                                                                                                                                                                                                                                                                                                                                                                                                                                                                                                                                                                                                                                               | explode all trees |
| #13 | (psychoeducat* or psycho-educat*):ti,ab,kw                                                                                                                                                                                                                                                                                                                                                                                                                                                                                                                                                                                                                                                                                                                                                                                                                                                                                                                                                                                                                                                                                  |                   |
| #14 | ((information* or educat* or guid* or counsel?ing or school* or Course* or Coach* or instruction or class* or advic* or advis* or handout* or hand-out* or pamphlet* or leaflet* or booklet* or brochure* or website) NEAR/3 (health or headache og migraine or treatment* or therapy or intervention or management or patient* or tailor* or individual* or Patient-centred or Patient-centered or Patient-oriented or Patient-focused or Patient-based or Patient-tailored or client-cent* or client cent* or client-focus* or client focus* or Client-oriented or Client-based or Client-tailored or person-centered or person-centred or person centered or person centred or person-focus* or person focus* or Person-oriented or Person-based or Person-tailored or Individual-centred or Individual-centered or Individual-focused or Individual-oriented or Individual-based or Individual-tailored)):ti,ab,kw                                                                                                                                                                                                      |                   |
| #15 | (self-management or self-instruction* or selfmanagement or selfinstruction* or self management or self instruction* or self-guid* or self guid* or selfguid*):ti,kw                                                                                                                                                                                                                                                                                                                                                                                                                                                                                                                                                                                                                                                                                                                                                                                                                                                                                                                                                         |                   |
| #16 | ((information* or instruction* or educat*) NEAR/3 (material or advic* or advis* or handout* or hand-out* or pamphlet* or leaflet* or booklet* or brochure* or guid* or resource* or e-book*)):ti,ab,kw                                                                                                                                                                                                                                                                                                                                                                                                                                                                                                                                                                                                                                                                                                                                                                                                                                                                                                                      |                   |
| #17 | ((education* or learn* or training or teach*) NEAR/2 (program* or patient* or consumer* or material* or resource* or aid*)):ti,ab,kw                                                                                                                                                                                                                                                                                                                                                                                                                                                                                                                                                                                                                                                                                                                                                                                                                                                                                                                                                                                        |                   |
| #18 | (patient NEAR/1 (information or knowledge or website*)):ti,ab,kw                                                                                                                                                                                                                                                                                                                                                                                                                                                                                                                                                                                                                                                                                                                                                                                                                                                                                                                                                                                                                                                            |                   |
| #19 | (workshop* or seminar* or ((discussion or support) NEAR/1 group*)):ti,ab,kw                                                                                                                                                                                                                                                                                                                                                                                                                                                                                                                                                                                                                                                                                                                                                                                                                                                                                                                                                                                                                                                 |                   |
| #20 | (factsheet* or fact sheet* or fact-sheet* or advice line* or advice-line* or hotline or help line* or help-line* or helpline*):ti,ab,kw                                                                                                                                                                                                                                                                                                                                                                                                                                                                                                                                                                                                                                                                                                                                                                                                                                                                                                                                                                                     |                   |
| #21 | ((tele* or tele-based or tele-support* or telehealth or tele-health or telemedicine or tele-medicine or internet* or internet-based or internetbased or internet-delivered or internet-support* or internet-assisted or web or webbased or web-based or web based or web-support* or web-assisted or WWW or email* or e-mail or telephone or phone or computer* or computer-based or computerbased or computer-support* or computer-assisted or PC or PCs or PC-based or pc-support* or pc-assisted or skype or skype-based or skype-delivered or skype-assisted or app or apps or app-based or app based or app-assisted or smartphone* or ipad* or tablet* or IOS or android* or online* or on-line or mobile or ehealth or e-health or e-therap* or distance or remote or video-conferenc* or videoconference* or chatroom* or electronic or digital* or technology or technology-based or technology-delivered or technology-supported or technology-assisted or distance) NEAR/3 (counsel* or support* or guide* or guidance or education or school* or course* or coach* or teach* or session* or information)):ti,kw |                   |
| #22 | (counsel*ing or tele-counsel*ing or tele-education or tele-instruction or tele-session* or tele-class* or tele-course* or tele-guid* or tele-coaching or internet-counsel*ing or internet-                                                                                                                                                                                                                                                                                                                                                                                                                                                                                                                                                                                                                                                                                                                                                                                                                                                                                                                                  |                   |



education or internet-instruction or internet-session\* or internet-class\* or internet-course\* or internet-coaching or internet-guid\* or web-counsel\*ing or web-education or web-instruction or web-session\* or web-class\* or web-course\* or web-coaching or web-guid\* or e-counsel\*ing):ti,kw

#23 #8 or #9 or #10 or #11 or #12 or #13 or #14 or #15 or #16 or #17 or #18 or #19 or #20 or #21 or #22

#24 #7 AND #23 with Publication Year from 2004 to 2020, in Trials

## Cinahl

| #   | Query                                                                                                                                                                                                                                                                                                                                                                                                                                                              | Limiters/Expanders                                                                          |
|-----|--------------------------------------------------------------------------------------------------------------------------------------------------------------------------------------------------------------------------------------------------------------------------------------------------------------------------------------------------------------------------------------------------------------------------------------------------------------------|---------------------------------------------------------------------------------------------|
| S27 | S21 AND S26                                                                                                                                                                                                                                                                                                                                                                                                                                                        | Limiters - Published Date: 20040101-20201231; Language: Danish, English, Norwegian, Swedish |
| S26 | S22 OR S23 OR S24 OR S25                                                                                                                                                                                                                                                                                                                                                                                                                                           |                                                                                             |
| S25 | ((patient* or person* or participant* or population* or allocate* or assign*) N3 (random* or blind* or mask*))                                                                                                                                                                                                                                                                                                                                                     |                                                                                             |
| S24 | (placebo* or single-blind* or double-blind* or triple-blind* or ((single or double or triple) N1 (blind* or mask*))                                                                                                                                                                                                                                                                                                                                                |                                                                                             |
| S23 | ((((random* or cluster-random* or quasi-random* or control#ed or crossover or cross-over or blind* or mask*) N4 (trial* or study or studies or analy*)) or rct)                                                                                                                                                                                                                                                                                                    |                                                                                             |
| S22 | PT Randomized Controlled Trial OR MH "Ranndomized Controlled Trials+"                                                                                                                                                                                                                                                                                                                                                                                              |                                                                                             |
| S21 | S4 and S20                                                                                                                                                                                                                                                                                                                                                                                                                                                         |                                                                                             |
| S20 | S5 OR S6 OR S7 OR S8 OR S9 OR S10 OR S11 OR S12 OR S13 OR S14 OR S15 OR S16 OR S17 OR S18 OR S19                                                                                                                                                                                                                                                                                                                                                                   |                                                                                             |
| S19 | (tele-counsel#ing or tele-education or tele-instruction or tele-session* or tele-class* or tele-course* or tele-guid* or tele-coaching or internet-counsel#ing or internet-education or internet-instruction or internet-session* or internet-class* or internet-course* or internet-coaching or internet-guid* or web-counsel#ing or web-education or web-instruction or web-session* or web-class* or web-course* or web-coaching or web-guid* or e-counsel#ing) |                                                                                             |
| S18 | ((tele* or tele-based or tele-support* or telehealth or tele-health or telemedicine or tele-medicine or internet* or internet-based or internetbased or internet-delivered or internet-support* or internet-assisted or web or webbased or web-based or web based or web-support* or web-assisted or WWW or email* or e-mail or telephone or phone                                                                                                                 |                                                                                             |

|     |                                                                                                                                                                                                                                                                                                                                                                                                                                                                                                                                                                                                                                                                                                                                                                                                                                                                                                           |  |
|-----|-----------------------------------------------------------------------------------------------------------------------------------------------------------------------------------------------------------------------------------------------------------------------------------------------------------------------------------------------------------------------------------------------------------------------------------------------------------------------------------------------------------------------------------------------------------------------------------------------------------------------------------------------------------------------------------------------------------------------------------------------------------------------------------------------------------------------------------------------------------------------------------------------------------|--|
|     | or computer* or computer-based or computerbased or computer-support* or computer-assisted or PC or PCs or PC-based or pc-support* or pc-assisted or skype or skype-based or skype-delivered or skype-assisted or apps or app-based or app based or app-assisted or smartphone* or ipad* or tablet* or IOS or android* or online* or on-line or mobile or ehealth or e-health or e-therap* or distance or remote or video-conferenc* or videoconference* or chatroom* or electronic or digital* or technology or technology-based or technology-delivered or technology-supported or technology-assisted or distance) N3 (counsel* or support* or guide* or guidance or education or school* or course* or coach* or teach* or session* or information))                                                                                                                                                   |  |
| S17 | (factsheet* or fact sheet* or advice line* or advice-line* or hotline or help line* or help-line* or helpline*)                                                                                                                                                                                                                                                                                                                                                                                                                                                                                                                                                                                                                                                                                                                                                                                           |  |
| S16 | (workshop* or seminar* or ((discussion or support) N1 group*))                                                                                                                                                                                                                                                                                                                                                                                                                                                                                                                                                                                                                                                                                                                                                                                                                                            |  |
| S15 | (patient N1 (information or knowledge or website*))                                                                                                                                                                                                                                                                                                                                                                                                                                                                                                                                                                                                                                                                                                                                                                                                                                                       |  |
| S14 | ((education* or learn* or training or teach*) N2 (program* or patient* or consumer* or material* or resource* or aid*))                                                                                                                                                                                                                                                                                                                                                                                                                                                                                                                                                                                                                                                                                                                                                                                   |  |
| S13 | ((information* or instruction* or educat*) N3 (material or advic* or advis* or handout* or hand-out* or pamphlet* or leaflet* or booklet* or brochure* or guid* or resource*))                                                                                                                                                                                                                                                                                                                                                                                                                                                                                                                                                                                                                                                                                                                            |  |
| S12 | (self-management or self-instruction* or selfmanagement or selfinstruction* or self management or self instruction* or self-guid* or self guid* or selfguid* or self care or self-care or selfcare or guidance)                                                                                                                                                                                                                                                                                                                                                                                                                                                                                                                                                                                                                                                                                           |  |
| S11 | ((information* or educat* or guid* or counsel#ing or school* or Course* or Coach* or instruction or class* or advic* or advis* or handout* or hand-out* or pamphlet* or leaflet* or booklet* or brochure* or website) N3 (health or headache og migraine or treatment* or therapy or intervention or management or patient* or tailor* or individual* or Patient-centred or Patient-centered or Patient-oriented or Patient-focused or Patient-based or Patient-tailored or client-cent* or client cent* or client-focus* or client focus* or Client-oriented or Client-based or Client-tailored or person-centered or person-centred or person centered or person centred or person-focus* or person focus* or Person-oriented or Person-based or Person-tailored or Individual-centred or Individual-centered or Individual-focused or Individual-oriented or Individual-based or Individual-tailored)) |  |
| S10 | (MH "Psychoeducation")                                                                                                                                                                                                                                                                                                                                                                                                                                                                                                                                                                                                                                                                                                                                                                                                                                                                                    |  |
| S9  | (psychoeducat* or psycho-educat*)                                                                                                                                                                                                                                                                                                                                                                                                                                                                                                                                                                                                                                                                                                                                                                                                                                                                         |  |

|    |                                                                                                                 |  |
|----|-----------------------------------------------------------------------------------------------------------------|--|
| S8 | (MH "Counseling") OR (MH "Anticipatory Guidance") OR (MH "Motivational Interviewing") OR (MH "Peer Counseling") |  |
| S7 | (MH "Telephone Information Services")                                                                           |  |
| S6 | (MH "Programmed Instruction+")                                                                                  |  |
| S5 | MH ("Health education" or "Patient Education" or "Patient Discharge Education" or "Psychoeducation")            |  |
| S4 | S1 OR S2 OR S3                                                                                                  |  |
| S3 | SU (headache* or head ache*)                                                                                    |  |
| S2 | (headache* or head ache*)                                                                                       |  |
| S1 | MH "Headache" or MH "Headache, Primary" or MH "Tension headache"                                                |  |

## PEDRO

Abstract & Title: headache\*

Therapy: Education

Method: Clinical trial

Published since: 2004-20

## OT Seeker

Title/Abstract: headache\* or migraine\*

Method: Randomised Controlled Trial

Year published: 2004-2020
